# Supplementary material for: Influence of Complexation of Thiosemicarbazone Derivatives with Cu (II) Ions on Their Antitumor Activity against Melanoma Cells
Source: PubMed Central journal article supplement (PMC8002893; doi:10.3390/ijms22063104), 2021-03-18

## Supplementary material for publication on line

# Influence of complexation of thiosemicarbazone derivatives with Cu (II) ions on their antitumor activity against melanoma cells

Monika Pitucha <sup>1,\*</sup>, Agnieszka Korga-Plewko<sup>2</sup>, Agnieszka Czyłkowska<sup>3</sup>, Bartłomiej Rogalewicz<sup>3</sup>, Monika Drozd<sup>1</sup> Magdalena Iwan <sup>4</sup>, Joanna Kubik<sup>2</sup>, Ewelina Humeniuk<sup>2</sup>, Grzegorz Adamczuk<sup>2</sup>, Zbigniew Karczmarczyk<sup>5</sup>, Emilia Fornal<sup>6</sup>, Waldemar Wysocki<sup>5</sup>, Paulina Bartnik<sup>5</sup>

<sup>1</sup> Independent Radiopharmacy Unit, Faculty of Pharmacy, Medical University of Lublin, PL-20093 Lublin, Poland

<sup>2</sup> Independent Medical Biology Unit, Faculty of Pharmacy, Medical University of Lublin, PL-20093 Lublin, Poland; agnieszkakorga@umlub.pl

<sup>3</sup> Institute of General and Ecological Chemistry, Faculty of Chemistry, Lodz University of Technology, Zeromskiego 116, 90-924 Lodz, Poland; 211150@edu.p.lodz.pl

<sup>4</sup> Chair and Department of Toxicology, Faculty of Pharmacy, Medical University of Lublin, PL-20093 Lublin, Poland; magda.iwan@umlub.pl

<sup>5</sup> Faculty of Science, Siedlce University of Natural Sciences and Humanities, 3 Maja 54, 08-110 Siedlce, Poland

<sup>6</sup> Chair and Department of Pathophysiology, Faculty of Medicine, Medical University of Lublin, PL-20090 Lublin

\* Correspondence: monika.pitucha@umlub.pl; Tel.: 48-81-448-72-40 (MP)

## *X-ray structure determination*

### **CIF for T2**

data\_shelx

```
_audit_creation_method      'SHELXL-2014/7'  
_shelx_SHELXL_version_number '2014/7'  
_chemical_name_systematic   ?  
_chemical_name_common       ?  
_chemical_melting_point     ?  
_chemical_formula_moiety    'C9 H10 Br N3 S'  
_chemical_formula_sum       'C9 H10 Br N3 S'  
_chemical_formula_weight    272.17
```

loop\_

```
_atom_type_symbol  
_atom_type_description  
_atom_type_scatter_dispersion_real  
_atom_type_scatter_dispersion_imag  
_atom_type_scatter_source  
'C' 'C' 0.0033 0.0016  
'International Tables Vol C Tables 4.2.6.8 and 6.1.1.4'  
'H' 'H' 0.0000 0.0000
```

International Tables Vol C Tables 4.2.6.8 and 6.1.1.4'  
'N' 'N' 0.0061 0.0033  
International Tables Vol C Tables 4.2.6.8 and 6.1.1.4'  
'S' 'S' 0.1246 0.1234  
International Tables Vol C Tables 4.2.6.8 and 6.1.1.4'  
'Br' 'Br' -0.2901 2.4595  
International Tables Vol C Tables 4.2.6.8 and 6.1.1.4'

\_space\_group\_crystal\_system orthorhombic  
\_space\_group\_IT\_number 61  
\_space\_group\_name\_H-M\_alt 'P b c a'  
\_space\_group\_name\_Hall '-P 2ac 2ab'

\_shelx\_space\_group\_comment

;

The symmetry employed for this shelxl refinement is uniquely defined by the following loop, which should always be used as a source of symmetry information in preference to the above space-group names. They are only intended as comments.

;

loop\_

\_space\_group\_symop\_operation\_xyz  
'x, y, z'  
'-x+1/2, -y, z+1/2'  
'-x, y+1/2, -z+1/2'  
'x+1/2, -y+1/2, -z'  
'-x, -y, -z'  
'x-1/2, y, -z-1/2'  
'x, -y-1/2, z-1/2'  
'-x-1/2, y-1/2, z'

\_cell\_length\_a 13.5800(15)  
\_cell\_length\_b 8.5494(8)  
\_cell\_length\_c 19.0926(18)  
\_cell\_angle\_alpha 90  
\_cell\_angle\_beta 90  
\_cell\_angle\_gamma 90  
\_cell\_volume 2216.7(4)  
\_cell\_formula\_units\_Z 8  
\_cell\_measurement\_temperature 296(2)  
\_cell\_measurement\_reflns\_used 2646  
\_cell\_measurement\_theta\_min 2.6100  
\_cell\_measurement\_theta\_max 26.1330

\_exptl\_crystal\_description plate  
\_exptl\_crystal\_colour colourless  
\_exptl\_crystal\_density\_meas ?  
\_exptl\_crystal\_density\_method ?  
\_exptl\_crystal\_density\_diffn 1.631  
\_exptl\_crystal\_F\_000 1088  
\_exptl\_transmission\_factor\_min ?  
\_exptl\_transmission\_factor\_max ?  
\_exptl\_crystal\_size\_max 0.5  
\_exptl\_crystal\_size\_mid 0.5  
\_exptl\_crystal\_size\_min 0.1  
\_exptl\_absorpt\_coefficient\_mu 3.862

```

_shelx_estimated_absorpt_T_min  ?
_shelx_estimated_absorpt_T_max  ?
_exptl_absorpt_correction_T_min  0.00545
_exptl_absorpt_correction_T_max  1.00000
_exptl_absorpt_correction_type   multi-scan
_exptl_absorpt_process_details
;
CrysAlisPro 1.171.39.46 (Rigaku Oxford Diffraction, 2018)
Empirical absorption correction using spherical harmonics,
implemented in SCALE3 ABSPACK scaling algorithm.
;
_exptl_absorpt_special_details  ?
_diffrn_ambient_temperature     296(2)
_diffrn_radiation_wavelength    0.71073
_diffrn_radiation_type          MoK\alpha
_diffrn_source                   ?
_diffrn_measurement_device_type  'KM4 CCD four-circle diffractometer'
_diffrn_measurement_method      ?
_diffrn_detector_area_resol_mean ?
_diffrn_reflns_number           12588
_diffrn_reflns_av_unetI/netI    0.0550
_diffrn_reflns_av_R_equivalents 0.0649
_diffrn_reflns_limit_h_min      -17
_diffrn_reflns_limit_h_max      17
_diffrn_reflns_limit_k_min      -10
_diffrn_reflns_limit_k_max      10
_diffrn_reflns_limit_l_min      -19
_diffrn_reflns_limit_l_max      23
_diffrn_reflns_theta_min        2.133
_diffrn_reflns_theta_max        28.098
_diffrn_reflns_theta_full       25.242
_diffrn_measured_fraction_theta_max 0.900
_diffrn_measured_fraction_theta_full 1.000
_diffrn_reflns_Laue_measured_fraction_max 0.900
_diffrn_reflns_Laue_measured_fraction_full 1.000
_diffrn_reflns_point_group_measured_fraction_max 0.900
_diffrn_reflns_point_group_measured_fraction_full 1.000
_reflns_number_total            2431
_reflns_number_gt               1713
_reflns_threshold_expression     'I > 2\sigma(I)'
_reflns_Friedel_coverage        0.000
_reflns_Friedel_fraction_max    .
_reflns_Friedel_fraction_full   .

_reflns_special_details
;
Reflections were merged by SHELXL according to the crystal
class for the calculation of statistics and refinement.

_reflns_Friedel_fraction is defined as the number of unique
Friedel pairs measured divided by the number that would be
possible theoretically, ignoring centric projections and
systematic absences.
;

_computing_data_collection
;

```

```

CrysAlisPro, Agilent Technologies,
Version 1.171.37.35h (release 09-02-2015 CrysAlis171 .NET)
(compiled Feb  9 2015,16:26:32)
;
_computing_cell_refinement
;
CrysAlisPro, Agilent Technologies,
Version 1.171.37.35h (release 09-02-2015 CrysAlis171 .NET)
(compiled Feb  9 2015,16:26:32)
;
_computing_data_reduction
;
CrysAlisPro, Agilent Technologies,
Version 1.171.37.35h (release 09-02-2015 CrysAlis171 .NET)
(compiled Feb  9 2015,16:26:32)
;
_computing_structure_solution 'SHELXS-2013/1 (Sheldrick, 2013)'
_computing_structure_refinement 'SHELXL-2014/7 (Sheldrick, 2014)'
_computing_molecular_graphics ?
_computing_publication_material ?
_refine_special_details ?
_refine_ls_structure_factor_coef Fsqd
_refine_ls_matrix_type full
_refine_ls_weighting_scheme calc
_refine_ls_weighting_details
'w=1/[s^2*(Fo^2)+(0.0805P)^2] where P=(Fo^2+2Fc^2)/3'
_atom_sites_solution_primary refxyz
_atom_sites_solution_secondary ?
_atom_sites_solution_hydrogens mixed
_refine_ls_hydrogen_treatment mixed
_refine_ls_extinction_method 'SHELXL-2014/7 (Sheldrick 2014)'
_refine_ls_extinction_coef 0.0020(6)
_refine_ls_extinction_expression
'Fc*^=kFc[1+0.001xFc^2^l^3/sin(2\q)]^-1/4^'
_refine_ls_number_reflns 2431
_refine_ls_number_parameters 135
_refine_ls_number_restraints 0
_refine_ls_R_factor_all 0.0759
_refine_ls_R_factor_gt 0.0489
_refine_ls_wR_factor_ref 0.1477
_refine_ls_wR_factor_gt 0.1286
_refine_ls_goodness_of_fit_ref 1.009
_refine_ls_restrained_S_all 1.009
_refine_ls_shift/su_max 0.001
_refine_ls_shift/su_mean 0.000

loop_
_atom_site_label
_atom_site_type_symbol
_atom_site_fract_x
_atom_site_fract_y
_atom_site_fract_z
_atom_site_U_iso_or_equiv
_atom_site_adp_type
_atom_site_occupancy
_atom_site_site_symmetry_order
_atom_site_calc_flag

```

```

_atom_site_refinement_flags_posn
_atom_site_refinement_flags_adp
_atom_site_refinement_flags_occupancy
_atom_site_disorder_assembly
_atom_site_disorder_group
C2 C 0.6286(2) 0.1361(4) 0.5668(2) 0.0355(8) Uani 1 1 d . . . . .
C6 C 0.5734(3) 0.3942(4) 0.4322(2) 0.0445(9) Uani 1 1 d . . . . .
H6 H 0.5320 0.3270 0.4077 0.067 Uiso 1 1 calc R U . . .
C7 C 0.7393(4) 0.1713(5) 0.6660(2) 0.0650(13) Uani 1 1 d . . . . .
H7A H 0.6908 0.1313 0.6979 0.097 Uiso 1 1 calc R U . . .
H7B H 0.7727 0.2582 0.6872 0.097 Uiso 1 1 calc R U . . .
H7C H 0.7861 0.0906 0.6553 0.097 Uiso 1 1 calc R U . . .
C21 C 0.5917(3) 0.5502(4) 0.4042(2) 0.0380(9) Uani 1 1 d . . . . .
C22 C 0.6431(2) 0.6627(4) 0.4409(2) 0.0420(9) Uani 1 1 d . . . . .
H22 H 0.6670 0.6396 0.4853 0.063 Uiso 1 1 calc R U . . .
C23 C 0.6597(3) 0.8085(4) 0.4128(2) 0.0433(9) Uani 1 1 d . . . . .
H23 H 0.6946 0.8835 0.4379 0.065 Uiso 1 1 calc R U . . .
C24 C 0.6240(2) 0.8416(4) 0.3471(2) 0.0404(9) Uani 1 1 d . . . . .
C25 C 0.5725(3) 0.7340(5) 0.3093(2) 0.0535(11) Uani 1 1 d . . . . .
H25 H 0.5490 0.7583 0.2649 0.080 Uiso 1 1 calc R U . . .
C26 C 0.5559(3) 0.5885(5) 0.3382(2) 0.0514(10) Uani 1 1 d . . . . .
H26 H 0.5202 0.5147 0.3130 0.077 Uiso 1 1 calc R U . . .
N1 N 0.6915(3) 0.2222(4) 0.60225(18) 0.0472(8) Uani 1 1 d . . . . .
H1 H 0.703(4) 0.304(6) 0.586(3) 0.071 Uiso 1 1 d . U . . .
N4 N 0.5902(2) 0.1965(3) 0.50833(18) 0.0435(8) Uani 1 1 d . . . . .
H4 H 0.546(3) 0.150(5) 0.490(2) 0.065 Uiso 1 1 d . U . . .
N5 N 0.6121(2) 0.3472(3) 0.48877(17) 0.0386(7) Uani 1 1 d . . . . .
S3 S 0.59704(7) -0.04697(10) 0.59064(6) 0.0465(3) Uani 1 1 d . . . . .
Br27 Br 0.64839(3) 1.04319(5) 0.30901(2) 0.0548(2) Uani 1 1 d . . . . .

```

loop\_

```

_atom_site_aniso_label
_atom_site_aniso_U_11
_atom_site_aniso_U_22
_atom_site_aniso_U_33
_atom_site_aniso_U_23
_atom_site_aniso_U_13
_atom_site_aniso_U_12
C2 0.0300(16) 0.0337(19) 0.043(2) -0.0003(15) -0.0009(16) 0.0040(14)
C6 0.0403(19) 0.036(2) 0.058(3) 0.0004(18) -0.0064(18) -0.0028(15)
C7 0.084(3) 0.058(3) 0.053(3) 0.009(2) -0.021(3) -0.021(2)
C21 0.0338(18) 0.036(2) 0.044(2) 0.0017(15) -0.0036(17) 0.0000(14)
C22 0.044(2) 0.041(2) 0.041(2) 0.0001(17) -0.0047(17) 0.0002(15)
C23 0.045(2) 0.0322(19) 0.052(3) -0.0025(17) -0.0034(17) -0.0040(15)
C24 0.0344(17) 0.0375(19) 0.049(2) 0.0065(17) 0.0033(18) -0.0012(14)
C25 0.061(3) 0.051(2) 0.048(3) 0.0087(19) -0.015(2) -0.005(2)
C26 0.057(2) 0.049(2) 0.048(2) 0.001(2) -0.019(2) -0.0117(18)
N1 0.055(2) 0.0360(17) 0.050(2) 0.0054(15) -0.0085(17) -0.0097(15)
N4 0.0383(16) 0.0337(16) 0.059(2) 0.0055(15) -0.0096(15) -0.0071(12)
N5 0.0383(15) 0.0313(15) 0.0464(19) 0.0046(13) -0.0020(15) -0.0025(12)
S3 0.0461(6) 0.0321(5) 0.0613(7) 0.0075(4) -0.0076(5) -0.0041(4)
Br27 0.0630(4) 0.0426(3) 0.0589(4) 0.01154(18) 0.0052(2) -0.00537(17)

```

\_geom\_special\_details

;

All esds (except the esd in the dihedral angle between two l.s. planes) are estimated using the full covariance matrix. The cell esds are taken

into account individually in the estimation of esds in distances, angles and torsion angles; correlations between esds in cell parameters are only used when they are defined by crystal symmetry. An approximate (isotropic) treatment of cell esds is used for estimating esds involving l.s. planes.

;

```
loop_  
_geom_bond_atom_site_label_1  
_geom_bond_atom_site_label_2  
_geom_bond_distance  
_geom_bond_site_symmetry_2  
_geom_bond_publ_flag  
C2 N1 1.316(5) . ?  
C2 N4 1.335(5) . ?  
C2 S3 1.686(4) . ?  
C6 N5 1.266(5) . ?  
C6 C21 1.458(5) . ?  
C6 H6 0.9300 . ?  
C7 N1 1.446(5) . ?  
C7 H7A 0.9600 . ?  
C7 H7B 0.9600 . ?  
C7 H7C 0.9600 . ?  
C21 C22 1.379(5) . ?  
C21 C26 1.391(5) . ?  
C22 C23 1.375(6) . ?  
C22 H22 0.9300 . ?  
C23 C24 1.374(5) . ?  
C23 H23 0.9300 . ?  
C24 C25 1.362(5) . ?  
C24 Br27 1.900(3) . ?  
C25 C26 1.379(6) . ?  
C25 H25 0.9300 . ?  
C26 H26 0.9300 . ?  
N1 H1 0.78(5) . ?  
N4 N5 1.373(4) . ?  
N4 H4 0.80(4) . ?
```

```
loop_  
_geom_angle_atom_site_label_1  
_geom_angle_atom_site_label_2  
_geom_angle_atom_site_label_3  
_geom_angle  
_geom_angle_site_symmetry_1  
_geom_angle_site_symmetry_3  
_geom_angle_publ_flag  
N1 C2 N4 117.9(3) . . ?  
N1 C2 S3 123.0(3) . . ?  
N4 C2 S3 119.1(3) . . ?  
N5 C6 C21 122.2(3) . . ?  
N5 C6 H6 118.9 . . ?  
C21 C6 H6 118.9 . . ?  
N1 C7 H7A 109.5 . . ?  
N1 C7 H7B 109.5 . . ?  
H7A C7 H7B 109.5 . . ?  
N1 C7 H7C 109.5 . . ?  
H7A C7 H7C 109.5 . . ?  
H7B C7 H7C 109.5 . . ?
```

C22 C21 C26 118.2(3) . . ?  
C22 C21 C6 122.6(4) . . ?  
C26 C21 C6 119.3(3) . . ?  
C23 C22 C21 121.2(4) . . ?  
C23 C22 H22 119.4 . . ?  
C21 C22 H22 119.4 . . ?  
C24 C23 C22 118.9(3) . . ?  
C24 C23 H23 120.5 . . ?  
C22 C23 H23 120.5 . . ?  
C25 C24 C23 121.8(3) . . ?  
C25 C24 Br27 119.9(3) . . ?  
C23 C24 Br27 118.3(3) . . ?  
C24 C25 C26 118.7(4) . . ?  
C24 C25 H25 120.6 . . ?  
C26 C25 H25 120.6 . . ?  
C25 C26 C21 121.2(4) . . ?  
C25 C26 H26 119.4 . . ?  
C21 C26 H26 119.4 . . ?  
C2 N1 C7 123.8(3) . . ?  
C2 N1 H1 116(4) . . ?  
C7 N1 H1 120(4) . . ?  
C2 N4 N5 120.4(3) . . ?  
C2 N4 H4 118(3) . . ?  
N5 N4 H4 120(3) . . ?  
C6 N5 N4 116.1(3) . . ?

loop\_

\_geom\_torsion\_atom\_site\_label\_1  
\_geom\_torsion\_atom\_site\_label\_2  
\_geom\_torsion\_atom\_site\_label\_3  
\_geom\_torsion\_atom\_site\_label\_4  
\_geom\_torsion  
\_geom\_torsion\_site\_symmetry\_1  
\_geom\_torsion\_site\_symmetry\_2  
\_geom\_torsion\_site\_symmetry\_3  
\_geom\_torsion\_site\_symmetry\_4  
\_geom\_torsion\_publ\_flag  
N5 C6 C21 C22 -7.3(6) . . . . ?  
N5 C6 C21 C26 172.9(4) . . . . ?  
C26 C21 C22 C23 -0.6(6) . . . . ?  
C6 C21 C22 C23 179.6(3) . . . . ?  
C21 C22 C23 C24 0.1(5) . . . . ?  
C22 C23 C24 C25 0.2(6) . . . . ?  
C22 C23 C24 Br27 -179.6(3) . . . . ?  
C23 C24 C25 C26 0.2(6) . . . . ?  
Br27 C24 C25 C26 179.9(3) . . . . ?  
C24 C25 C26 C21 -0.7(7) . . . . ?  
C22 C21 C26 C25 1.0(6) . . . . ?  
C6 C21 C26 C25 -179.2(4) . . . . ?  
N4 C2 N1 C7 -179.5(4) . . . . ?  
S3 C2 N1 C7 -1.1(6) . . . . ?  
N1 C2 N4 N5 -3.7(5) . . . . ?  
S3 C2 N4 N5 177.9(3) . . . . ?  
C21 C6 N5 N4 -178.7(3) . . . . ?  
C2 N4 N5 C6 179.2(3) . . . . ?

\_refine\_diff\_density\_max 0.675

\_refine\_diff\_density\_min -0.457  
\_refine\_diff\_density\_rms 0.107

\_shelx\_res\_file  
;

shelx.res created by SHELXL-2014/7

TITL T2\_20191007\_03 in Pbca  
CELL 0.71073 13.5800 8.5494 19.0926 90.000 90.000 90.000  
ZERR 8.00 0.0015 0.0008 0.0018 0.000 0.000 0.000  
LATT 1  
SYMM 1/2 - X, - Y, 1/2 + Z  
SYMM - X, 1/2 + Y, 1/2 - Z  
SYMM 1/2 + X, 1/2 - Y, - Z  
SFAC C H N S BR  
UNIT 72 80 24 8 8  
MERG 2  
FMAP 2  
PLAN -30  
ACTA  
BOND \$H  
CONF  
L.S. 30  
WGHT 0.080500  
EXTI 0.001960  
FVAR 2.47847  
MOLE 1  
C2 1 0.628599 0.136142 0.566764 11.00000 0.03004 0.03371 =  
0.04288 -0.00034 -0.00089 0.00396  
C6 1 0.573400 0.394177 0.432235 11.00000 0.04033 0.03561 =  
0.05770 0.00042 -0.00637 -0.00281  
AFIX 43  
H6 2 0.531971 0.327005 0.407748 11.00000 -1.50000  
AFIX 0  
C7 1 0.739275 0.171311 0.665992 11.00000 0.08381 0.05812 =  
0.05304 0.00926 -0.02125 -0.02098  
AFIX 137  
H7A 2 0.690776 0.131273 0.697879 11.00000 -1.50000  
H7B 2 0.772686 0.258247 0.687160 11.00000 -1.50000  
H7C 2 0.786069 0.090630 0.655257 11.00000 -1.50000  
AFIX 0  
C21 1 0.591673 0.550154 0.404239 11.00000 0.03380 0.03596 =  
0.04431 0.00171 -0.00362 0.00003  
C22 1 0.643125 0.662699 0.440858 11.00000 0.04368 0.04113 =  
0.04129 0.00013 -0.00471 0.00020  
AFIX 43  
H22 2 0.667025 0.639558 0.485313 11.00000 -1.50000  
AFIX 0  
C23 1 0.659718 0.808515 0.412813 11.00000 0.04542 0.03219 =  
0.05233 -0.00254 -0.00341 -0.00401  
AFIX 43  
H23 2 0.694576 0.883537 0.437901 11.00000 -1.50000  
AFIX 0  
C24 1 0.623969 0.841576 0.347133 11.00000 0.03444 0.03752 =  
0.04933 0.00652 0.00332 -0.00125



C25 1 0.572496 0.734044 0.309309 11.00000 0.06066 0.05145 =  
 0.04846 0.00874 -0.01545 -0.00540  
 AFIX 43  
 H25 2 0.548972 0.758294 0.264871 11.00000 -1.50000  
 AFIX 0  
 C26 1 0.555921 0.588490 0.338169 11.00000 0.05670 0.04922 =  
 0.04818 0.00135 -0.01900 -0.01165  
 AFIX 43  
 H26 2 0.520195 0.514657 0.312992 11.00000 -1.50000  
 AFIX 0  
 N1 3 0.691525 0.222195 0.602253 11.00000 0.05524 0.03596 =  
 0.05031 0.00542 -0.00846 -0.00966  
 H1 2 0.703428 0.304255 0.586235 11.00000 -1.50000  
 N4 3 0.590234 0.196545 0.508332 11.00000 0.03826 0.03370 =  
 0.05856 0.00552 -0.00962 -0.00714  
 H4 2 0.545851 0.150487 0.489752 11.00000 -1.50000  
 N5 3 0.612054 0.347160 0.488766 11.00000 0.03826 0.03127 =  
 0.04640 0.00456 -0.00202 -0.00253  
 S3 4 0.597036 -0.046970 0.590640 11.00000 0.04613 0.03205 =  
 0.06130 0.00747 -0.00762 -0.00415  
 BR27 5 0.648392 1.043191 0.309010 11.00000 0.06302 0.04261 =  
 0.05891 0.01154 0.00523 -0.00537  
 HKLF 4

REM T2\_20191007\_03 in Pbcu  
 REM R1 = 0.0489 for 1713 Fo > 4sig(Fo) and 0.0759 for all 2431 data  
 REM 135 parameters refined using 0 restraints

END

WGHT 0.0806 0.0000

REM Highest difference peak 0.675, deepest hole -0.457, 1-sigma level 0.107

Q1 1 0.7393 1.0172 0.3084 11.00000 0.05 0.67  
 Q2 1 0.6866 1.0520 0.3563 11.00000 0.05 0.51  
 Q3 1 0.5556 1.0251 0.3087 11.00000 0.05 0.51  
 Q4 1 0.6481 0.8915 0.3087 11.00000 0.05 0.47  
 Q5 1 0.7321 0.9108 0.3058 11.00000 0.05 0.41  
 Q6 1 0.7632 1.1983 0.3082 11.00000 0.05 0.39  
 Q7 1 0.6503 1.1956 0.3104 11.00000 0.05 0.38  
 Q8 1 0.6022 1.0703 0.3587 11.00000 0.05 0.38  
 Q9 1 0.5229 -0.0122 0.5885 11.00000 0.05 0.38  
 Q10 1 0.6944 1.0479 0.2581 11.00000 0.05 0.37  
 Q11 1 0.6588 0.7615 0.3090 11.00000 0.05 0.36  
 Q12 1 0.6988 -0.0535 0.5932 11.00000 0.05 0.35  
 Q13 1 0.6437 -0.0471 0.6403 11.00000 0.05 0.35  
 Q14 1 0.5615 0.9315 0.3067 11.00000 0.05 0.35  
 Q15 1 0.6023 1.0274 0.2580 11.00000 0.05 0.31  
 Q16 1 0.4765 0.5989 0.4016 11.00000 0.05 0.30  
 Q17 1 0.7105 0.8007 0.3010 11.00000 0.05 0.30  
 Q18 1 0.4563 0.5559 0.3193 11.00000 0.05 0.29  
 Q19 1 0.5565 0.7469 0.1882 11.00000 0.05 0.28  
 Q20 1 0.7359 0.0590 0.6829 11.00000 0.05 0.28  
 Q21 1 0.5843 1.2311 0.3045 11.00000 0.05 0.27  
 Q22 1 0.6666 1.3203 0.3094 11.00000 0.05 0.27  
 Q23 1 0.7618 0.3288 0.5913 11.00000 0.05 0.27  
 Q24 1 0.6815 1.2592 0.3004 11.00000 0.05 0.26

Q25 1 0.4334 0.7941 0.3078 11.00000 0.05 0.25  
 Q26 1 0.4826 0.0672 0.5842 11.00000 0.05 0.25  
 Q27 1 0.7406 0.2973 0.5732 11.00000 0.05 0.25  
 Q28 1 0.4815 0.4325 0.3137 11.00000 0.05 0.25  
 Q29 1 0.6620 0.9586 0.2489 11.00000 0.05 0.24  
 Q30 1 0.5563 -0.0359 0.6415 11.00000 0.05 0.24  
 ;

### CIF for T3

data\_shelx

\_audit\_creation\_method 'SHELXL-2014/7'  
 \_shelx\_SHELXL\_version\_number '2014/7'  
 \_chemical\_name\_systematic ?  
 \_chemical\_name\_common ?  
 \_chemical\_melting\_point ?  
 \_chemical\_formula\_moiety 'C11 H15 N3 O2 S'  
 \_chemical\_formula\_sum 'C11 H15 N3 O2 S'  
 \_chemical\_formula\_weight 253.32

loop\_

\_atom\_type\_symbol  
 \_atom\_type\_description  
 \_atom\_type\_scatter\_dispersion\_real  
 \_atom\_type\_scatter\_dispersion\_imag  
 \_atom\_type\_scatter\_source  
 'C' 'C' 0.0033 0.0016  
 'International Tables Vol C Tables 4.2.6.8 and 6.1.1.4'  
 'H' 'H' 0.0000 0.0000  
 'International Tables Vol C Tables 4.2.6.8 and 6.1.1.4'  
 'N' 'N' 0.0061 0.0033  
 'International Tables Vol C Tables 4.2.6.8 and 6.1.1.4'  
 'O' 'O' 0.0106 0.0060  
 'International Tables Vol C Tables 4.2.6.8 and 6.1.1.4'  
 'S' 'S' 0.1246 0.1234  
 'International Tables Vol C Tables 4.2.6.8 and 6.1.1.4'

\_space\_group\_crystal\_system monoclinic  
 \_space\_group\_IT\_number 14  
 \_space\_group\_name\_H-M\_alt 'P 21/c'  
 \_space\_group\_name\_Hall '-P 2ybc'

\_shelx\_space\_group\_comment

;  
 The symmetry employed for this shelxl refinement is uniquely defined  
 by the following loop, which should always be used as a source of  
 symmetry information in preference to the above space-group names.  
 They are only intended as comments.

;

loop\_

\_space\_group\_symop\_operation\_xyz  
 'x, y, z'  
 '-x, y+1/2, -z+1/2'  
 '-x, -y, -z'

'x, -y-1/2, z-1/2'

\_cell\_length\_a 8.5409(7)  
\_cell\_length\_b 8.1329(5)  
\_cell\_length\_c 18.8922(12)  
\_cell\_angle\_alpha 90  
\_cell\_angle\_beta 102.099(7)  
\_cell\_angle\_gamma 90  
\_cell\_volume 1283.15(16)  
\_cell\_formula\_units\_Z 4  
\_cell\_measurement\_temperature 296(2)  
\_cell\_measurement\_reflns\_used 4130  
\_cell\_measurement\_theta\_min 2.2510  
\_cell\_measurement\_theta\_max 27.8070

\_exptl\_crystal\_description block  
\_exptl\_crystal\_colour colourless  
\_exptl\_crystal\_density\_meas ?  
\_exptl\_crystal\_density\_method ?  
\_exptl\_crystal\_density\_diffn 1.311  
\_exptl\_crystal\_F\_000 536  
\_exptl\_transmission\_factor\_min ?  
\_exptl\_transmission\_factor\_max ?  
\_exptl\_crystal\_size\_max 0.5  
\_exptl\_crystal\_size\_mid 0.5  
\_exptl\_crystal\_size\_min 0.3  
\_exptl\_absorpt\_coefficient\_mu 0.247  
\_shelx\_estimated\_absorpt\_T\_min ?  
\_shelx\_estimated\_absorpt\_T\_max ?  
\_exptl\_absorpt\_correction\_T\_min 0.75249  
\_exptl\_absorpt\_correction\_T\_max 1.00000  
\_exptl\_absorpt\_correction\_type multi-scan  
\_exptl\_absorpt\_process\_details

;

CrysAlisPro, Agilent Technologies,  
Version 1.171.37.35h (release 09-02-2015 CrysAlis171 .NET)  
(compiled Feb 9 2015,16:26:32)

Empirical absorption correction using spherical harmonics,  
implemented in SCALE3 ABSPACK scaling algorithm.

;

\_exptl\_absorpt\_special\_details ?  
\_diffn\_ambient\_temperature 296(2)  
\_diffn\_radiation\_wavelength 0.71073  
\_diffn\_radiation\_type MoK\alpha  
\_diffn\_source ?  
\_diffn\_measurement\_device\_type 'KM4 CCD four-circle diffractometer'  
\_diffn\_measurement\_method ?  
\_diffn\_detector\_area\_resol\_mean ?  
\_diffn\_reflns\_number 8182  
\_diffn\_reflns\_av\_unetI/netI 0.0156  
\_diffn\_reflns\_av\_R\_equivalents 0.0177  
\_diffn\_reflns\_limit\_h\_min -10  
\_diffn\_reflns\_limit\_h\_max 10  
\_diffn\_reflns\_limit\_k\_min -9  
\_diffn\_reflns\_limit\_k\_max 6  
\_diffn\_reflns\_limit\_l\_min -22  
\_diffn\_reflns\_limit\_l\_max 22

```

_diffn_reflns_theta_min      2.205
_diffn_reflns_theta_max     27.778
_diffn_reflns_theta_full    25.242
_diffn_measured_fraction_theta_max 0.879
_diffn_measured_fraction_theta_full 1.000
_diffn_reflns_Laue_measured_fraction_max 0.879
_diffn_reflns_Laue_measured_fraction_full 1.000
_diffn_reflns_point_group_measured_fraction_max 0.879
_diffn_reflns_point_group_measured_fraction_full 1.000
_reflns_number_total        2666
_reflns_number_gt          2366
_reflns_threshold_expression 'I > 2\sigma(I)'
_reflns_Friedel_coverage    0.000
_reflns_Friedel_fraction_max .
_reflns_Friedel_fraction_full .

_reflns_special_details
;
Reflections were merged by SHELXL according to the crystal
class for the calculation of statistics and refinement.

_reflns_Friedel_fraction is defined as the number of unique
Friedel pairs measured divided by the number that would be
possible theoretically, ignoring centric projections and
systematic absences.
;

_computing_data_collection
;
CrysAlisPro, Agilent Technologies,
Version 1.171.37.35h (release 09-02-2015 CrysAlis171 .NET)
(compiled Feb 9 2015,16:26:32)
;
_computing_cell_refinement
;
CrysAlisPro, Agilent Technologies,
Version 1.171.37.35h (release 09-02-2015 CrysAlis171 .NET)
(compiled Feb 9 2015,16:26:32)
;
_computing_data_reduction
;
CrysAlisPro, Agilent Technologies,
Version 1.171.37.35h (release 09-02-2015 CrysAlis171 .NET)
(compiled Feb 9 2015,16:26:32)
;
_computing_structure_solution 'SHELXS-2013/1 (Sheldrick, 2013)'
_computing_structure_refinement 'SHELXL-2014/7 (Sheldrick, 2014)'
_computing_molecular_graphics ?
_computing_publication_material ?
_refine_special_details ?
_refine_ls_structure_factor_coef Fsqd
_refine_ls_matrix_type full
_refine_ls_weighting_scheme calc
_refine_ls_weighting_details
'w=1/[\sigma^2(Fo^2)+(0.0426P)^2+0.3621P] where P=(Fo^2+2Fc^2)/3'
_atom_sites_solution_primary refxyz
_atom_sites_solution_secondary ?

```

```

_atom_sites_solution_hydrogens mixed
_refine_ls_hydrogen_treatment mixed
_refine_ls_extinction_method 'SHELXL-2014/7 (Sheldrick 2014)'
_refine_ls_extinction_coef 0.0142(17)
_refine_ls_extinction_expression
Fc^*^=kFc[1+0.001xFc^2^l^3^/sin(2\q)]^-1/4^
_refine_ls_number_reflns 2666
_refine_ls_number_parameters 164
_refine_ls_number_restraints 0
_refine_ls_R_factor_all 0.0362
_refine_ls_R_factor_gt 0.0313
_refine_ls_wR_factor_ref 0.0881
_refine_ls_wR_factor_gt 0.0846
_refine_ls_goodness_of_fit_ref 1.045
_refine_ls_restrained_S_all 1.045
_refine_ls_shift/su_max 0.000
_refine_ls_shift/su_mean 0.000

```

loop\_

```

_atom_site_label
_atom_site_type_symbol
_atom_site_fract_x
_atom_site_fract_y
_atom_site_fract_z
_atom_site_U_iso_or_equiv
_atom_site_adp_type
_atom_site_occupancy
_atom_site_site_symmetry_order
_atom_site_calc_flag
_atom_site_refinement_flags_posn
_atom_site_refinement_flags_adp
_atom_site_refinement_flags_occupancy
_atom_site_disorder_assembly
_atom_site_disorder_group
C2 C 0.99910(15) -0.12039(15) 0.11931(7) 0.0311(3) Uani 1 1 d . . . . .
C6 C 0.64184(15) 0.10073(18) 0.07411(7) 0.0376(3) Uani 1 1 d . . . . .
H6 H 0.6523 0.1226 0.0270 0.056 Uiso 1 1 calc R U . . .
C7 C 1.1177(2) -0.2616(2) 0.23209(8) 0.0546(4) Uani 1 1 d . . . . .
H7A H 1.1537 -0.3494 0.2056 0.082 Uiso 1 1 calc R U . . .
H7B H 1.0787 -0.3061 0.2722 0.082 Uiso 1 1 calc R U . . .
H7C H 1.2051 -0.1881 0.2498 0.082 Uiso 1 1 calc R U . . .
C21 C 0.50276(16) 0.16718(16) 0.09795(7) 0.0352(3) Uani 1 1 d . . . . .
C22 C 0.47854(15) 0.14654(16) 0.16873(7) 0.0332(3) Uani 1 1 d . . . . .
H22 H 0.5534 0.0895 0.2028 0.050 Uiso 1 1 calc R U . . .
C23 C 0.34378(15) 0.21090(16) 0.18766(7) 0.0336(3) Uani 1 1 d . . . . .
C24 C 0.22811(16) 0.29395(17) 0.13577(7) 0.0361(3) Uani 1 1 d . . . . .
C25 C 0.25324(18) 0.3157(2) 0.06673(8) 0.0461(4) Uani 1 1 d . . . . .
H25 H 0.1784 0.3723 0.0325 0.069 Uiso 1 1 calc R U . . .
C26 C 0.39027(18) 0.2532(2) 0.04822(8) 0.0459(4) Uani 1 1 d . . . . .
H26 H 0.4069 0.2693 0.0016 0.069 Uiso 1 1 calc R U . . .
C28 C 0.4277(2) 0.1368(3) 0.31217(8) 0.0589(5) Uani 1 1 d . . . . .
H28A H 0.4518 0.0253 0.3016 0.088 Uiso 1 1 calc R U . . .
H28B H 0.3893 0.1400 0.3564 0.088 Uiso 1 1 calc R U . . .
H28C H 0.5228 0.2025 0.3173 0.088 Uiso 1 1 calc R U . . .
C29 C -0.03031(18) 0.4177(2) 0.10612(9) 0.0511(4) Uani 1 1 d . . . . .
H29A H 0.0074 0.5164 0.0873 0.077 Uiso 1 1 calc R U . . .
H29B H -0.1190 0.4435 0.1281 0.077 Uiso 1 1 calc R U . . .

```

H29C H -0.0642 0.3408 0.0674 0.077 Uiso 1 1 calc R U . . .  
 N1 N 0.99009(15) -0.17262(15) 0.18497(6) 0.0397(3) Uani 1 1 d . . . . .  
 H1 H 0.910(2) -0.151(2) 0.1999(11) 0.060 Uiso 1 1 d . U . . .  
 N4 N 0.87451(13) -0.03239(15) 0.08246(6) 0.0384(3) Uani 1 1 d . . . . .  
 H4 H 0.875(2) 0.003(2) 0.0399(10) 0.058 Uiso 1 1 d . U . . .  
 N5 N 0.74994(12) 0.01429(14) 0.11432(6) 0.0343(3) Uani 1 1 d . . . . .  
 O27 O 0.30829(12) 0.19967(15) 0.25478(5) 0.0484(3) Uani 1 1 d . . . . .  
 O28 O 0.09617(12) 0.34676(13) 0.15915(6) 0.0470(3) Uani 1 1 d . . . . .  
 S3 S 1.15525(4) -0.16089(5) 0.07998(2) 0.04145(14) Uani 1 1 d . . . . .

loop\_

\_atom\_site\_aniso\_label  
 \_atom\_site\_aniso\_U\_11  
 \_atom\_site\_aniso\_U\_22  
 \_atom\_site\_aniso\_U\_33  
 \_atom\_site\_aniso\_U\_23  
 \_atom\_site\_aniso\_U\_13  
 \_atom\_site\_aniso\_U\_12  
 C2 0.0310(6) 0.0328(6) 0.0308(6) -0.0020(5) 0.0095(5) -0.0009(5)  
 C6 0.0331(7) 0.0505(8) 0.0315(7) -0.0005(6) 0.0118(5) 0.0045(6)  
 C7 0.0624(10) 0.0661(10) 0.0351(8) 0.0077(7) 0.0096(7) 0.0237(8)  
 C21 0.0305(6) 0.0428(7) 0.0335(7) -0.0023(5) 0.0096(5) 0.0028(5)  
 C22 0.0282(6) 0.0394(7) 0.0320(7) -0.0015(5) 0.0061(5) 0.0022(5)  
 C23 0.0320(6) 0.0388(7) 0.0314(6) -0.0038(5) 0.0099(5) 0.0003(5)  
 C24 0.0309(6) 0.0381(7) 0.0408(7) -0.0033(6) 0.0109(6) 0.0054(5)  
 C25 0.0408(8) 0.0585(9) 0.0392(8) 0.0082(6) 0.0090(6) 0.0170(7)  
 C26 0.0433(8) 0.0626(10) 0.0343(7) 0.0063(6) 0.0134(6) 0.0122(7)  
 C28 0.0537(10) 0.0899(13) 0.0341(8) 0.0095(8) 0.0118(7) 0.0140(9)  
 C29 0.0365(8) 0.0547(9) 0.0623(10) 0.0063(8) 0.0109(7) 0.0139(7)  
 N1 0.0397(7) 0.0502(7) 0.0322(6) 0.0050(5) 0.0145(5) 0.0101(5)  
 N4 0.0339(6) 0.0546(7) 0.0302(6) 0.0059(5) 0.0146(5) 0.0108(5)  
 N5 0.0299(5) 0.0434(6) 0.0321(6) -0.0029(5) 0.0124(4) 0.0034(5)  
 O27 0.0401(6) 0.0754(7) 0.0326(5) 0.0034(5) 0.0142(4) 0.0150(5)  
 O28 0.0379(5) 0.0587(6) 0.0478(6) 0.0048(5) 0.0164(5) 0.0182(5)  
 S3 0.0340(2) 0.0526(2) 0.0424(2) 0.00832(15) 0.01854(15) 0.00904(14)

\_geom\_special\_details

;  
 All esds (except the esd in the dihedral angle between two l.s. planes)  
 are estimated using the full covariance matrix. The cell esds are taken  
 into account individually in the estimation of esds in distances, angles  
 and torsion angles; correlations between esds in cell parameters are only  
 used when they are defined by crystal symmetry. An approximate (isotropic)  
 treatment of cell esds is used for estimating esds involving l.s. planes.  
 ;

loop\_

\_geom\_bond\_atom\_site\_label\_1  
 \_geom\_bond\_atom\_site\_label\_2  
 \_geom\_bond\_distance  
 \_geom\_bond\_site\_symmetry\_2  
 \_geom\_bond\_publ\_flag  
 C2 N1 1.3285(17) . ?  
 C2 N4 1.3487(17) . ?  
 C2 S3 1.6896(13) . ?  
 C6 N5 1.2766(17) . ?  
 C6 C21 1.4595(18) . ?

C6 H6 0.9300 . ?  
C7 N1 1.4479(18) . ?  
C7 H7A 0.9600 . ?  
C7 H7B 0.9600 . ?  
C7 H7C 0.9600 . ?  
C21 C26 1.3846(19) . ?  
C21 C22 1.4053(18) . ?  
C22 C23 1.3781(18) . ?  
C22 H22 0.9300 . ?  
C23 O27 1.3671(16) . ?  
C23 C24 1.4098(19) . ?  
C24 O28 1.3631(16) . ?  
C24 C25 1.377(2) . ?  
C25 C26 1.386(2) . ?  
C25 H25 0.9300 . ?  
C26 H26 0.9300 . ?  
C28 O27 1.4192(18) . ?  
C28 H28A 0.9600 . ?  
C28 H28B 0.9600 . ?  
C28 H28C 0.9600 . ?  
C29 O28 1.4317(18) . ?  
C29 H29A 0.9600 . ?  
C29 H29B 0.9600 . ?  
C29 H29C 0.9600 . ?  
N1 H1 0.813(19) . ?  
N4 N5 1.3809(14) . ?  
N4 H4 0.854(19) . ?

loop\_

\_geom\_angle\_atom\_site\_label\_1  
\_geom\_angle\_atom\_site\_label\_2  
\_geom\_angle\_atom\_site\_label\_3  
\_geom\_angle  
\_geom\_angle\_site\_symmetry\_1  
\_geom\_angle\_site\_symmetry\_3  
\_geom\_angle\_publ\_flag  
N1 C2 N4 117.25(11) . . ?  
N1 C2 S3 123.63(10) . . ?  
N4 C2 S3 119.11(9) . . ?  
N5 C6 C21 123.66(12) . . ?  
N5 C6 H6 118.2 . . ?  
C21 C6 H6 118.2 . . ?  
N1 C7 H7A 109.5 . . ?  
N1 C7 H7B 109.5 . . ?  
H7A C7 H7B 109.5 . . ?  
N1 C7 H7C 109.5 . . ?  
H7A C7 H7C 109.5 . . ?  
H7B C7 H7C 109.5 . . ?  
C26 C21 C22 119.10(12) . . ?  
C26 C21 C6 118.14(12) . . ?  
C22 C21 C6 122.75(12) . . ?  
C23 C22 C21 119.94(12) . . ?  
C23 C22 H22 120.0 . . ?  
C21 C22 H22 120.0 . . ?  
O27 C23 C22 125.10(12) . . ?  
O27 C23 C24 114.69(11) . . ?  
C22 C23 C24 120.21(12) . . ?

O28 C24 C25 124.75(12) . . ?  
 O28 C24 C23 115.60(12) . . ?  
 C25 C24 C23 119.65(12) . . ?  
 C24 C25 C26 119.94(13) . . ?  
 C24 C25 H25 120.0 . . ?  
 C26 C25 H25 120.0 . . ?  
 C21 C26 C25 121.11(13) . . ?  
 C21 C26 H26 119.4 . . ?  
 C25 C26 H26 119.4 . . ?  
 O27 C28 H28A 109.5 . . ?  
 O27 C28 H28B 109.5 . . ?  
 H28A C28 H28B 109.5 . . ?  
 O27 C28 H28C 109.5 . . ?  
 H28A C28 H28C 109.5 . . ?  
 H28B C28 H28C 109.5 . . ?  
 O28 C29 H29A 109.5 . . ?  
 O28 C29 H29B 109.5 . . ?  
 H29A C29 H29B 109.5 . . ?  
 O28 C29 H29C 109.5 . . ?  
 H29A C29 H29C 109.5 . . ?  
 H29B C29 H29C 109.5 . . ?  
 C2 N1 C7 123.39(12) . . ?  
 C2 N1 H1 118.2(14) . . ?  
 C7 N1 H1 118.3(14) . . ?  
 C2 N4 N5 121.16(11) . . ?  
 C2 N4 H4 120.0(12) . . ?  
 N5 N4 H4 118.6(12) . . ?  
 C6 N5 N4 114.79(11) . . ?  
 C23 O27 C28 117.97(11) . . ?  
 C24 O28 C29 117.00(12) . . ?

loop\_

\_geom\_torsion\_atom\_site\_label\_1  
 \_geom\_torsion\_atom\_site\_label\_2  
 \_geom\_torsion\_atom\_site\_label\_3  
 \_geom\_torsion\_atom\_site\_label\_4  
 \_geom\_torsion  
 \_geom\_torsion\_site\_symmetry\_1  
 \_geom\_torsion\_site\_symmetry\_2  
 \_geom\_torsion\_site\_symmetry\_3  
 \_geom\_torsion\_site\_symmetry\_4  
 \_geom\_torsion\_publ\_flag  
 N5 C6 C21 C26 -177.27(14) . . . . ?  
 N5 C6 C21 C22 2.4(2) . . . . ?  
 C26 C21 C22 C23 0.3(2) . . . . ?  
 C6 C21 C22 C23 -179.32(13) . . . . ?  
 C21 C22 C23 O27 -179.46(13) . . . . ?  
 C21 C22 C23 C24 1.6(2) . . . . ?  
 O27 C23 C24 O28 -1.78(18) . . . . ?  
 C22 C23 C24 O28 177.31(12) . . . . ?  
 O27 C23 C24 C25 178.55(13) . . . . ?  
 C22 C23 C24 C25 -2.4(2) . . . . ?  
 O28 C24 C25 C26 -178.37(14) . . . . ?  
 C23 C24 C25 C26 1.3(2) . . . . ?  
 C22 C21 C26 C25 -1.4(2) . . . . ?  
 C6 C21 C26 C25 178.24(14) . . . . ?  
 C24 C25 C26 C21 0.6(2) . . . . ?



N4 C2 N1 C7 -177.01(14) . . . ?  
S3 C2 N1 C7 4.0(2) . . . ?  
N1 C2 N4 N5 5.86(19) . . . ?  
S3 C2 N4 N5 -175.08(10) . . . ?  
C21 C6 N5 N4 -177.95(12) . . . ?  
C2 N4 N5 C6 178.25(13) . . . ?  
C22 C23 O27 C28 8.9(2) . . . ?  
C24 C23 O27 C28 -172.08(14) . . . ?  
C25 C24 O28 C29 5.4(2) . . . ?  
C23 C24 O28 C29 -174.28(12) . . . ?

\_refine\_diff\_density\_max 0.219  
\_refine\_diff\_density\_min -0.159  
\_refine\_diff\_density\_rms 0.034

\_shelx\_res\_file

;

shelx.res created by SHELXL-2014/7

TITL T3\_20191008 in P2(1)/c  
CELL 0.71073 8.5409 8.1329 18.8922 90.000 102.099 90.000  
ZERR 4.00 0.0007 0.0005 0.0012 0.000 0.007 0.000  
LATT 1  
SYMM - X, 1/2 + Y, 1/2 - Z  
SFAC C H N O S  
UNIT 44 60 12 8 4  
MERG 2  
FMAP 2  
PLAN 20  
ACTA  
BOND \$H  
CONF  
L.S. 40  
WGHT 0.042600 0.362100  
EXTI 0.014162  
FVAR 6.08435  
MOLE 1  
C2 1 0.999099 -0.120394 0.119315 11.00000 0.03104 0.03278 =  
0.03078 -0.00204 0.00947 -0.00088  
C6 1 0.641836 0.100731 0.074110 11.00000 0.03307 0.05051 =  
0.03152 -0.00047 0.01182 0.00452  
AFIX 43  
H6 2 0.652287 0.122583 0.027002 11.00000 -1.50000  
AFIX 0  
C7 1 1.117663 -0.261567 0.232090 11.00000 0.06237 0.06610 =  
0.03506 0.00772 0.00955 0.02366  
AFIX 137  
H7A 2 1.153710 -0.349450 0.205557 11.00000 -1.50000  
H7B 2 1.078739 -0.306097 0.272203 11.00000 -1.50000  
H7C 2 1.205127 -0.188129 0.249751 11.00000 -1.50000  
AFIX 0  
C21 1 0.502762 0.167179 0.097949 11.00000 0.03046 0.04284 =  
0.03352 -0.00231 0.00959 0.00281  
C22 1 0.478541 0.146542 0.168727 11.00000 0.02816 0.03938 =  
0.03201 -0.00153 0.00609 0.00216

```

AFIX 43
H22 2 0.553388 0.089506 0.202759 11.00000 -1.50000
AFIX 0
C23 1 0.343779 0.210897 0.187661 11.00000 0.03196 0.03879 =
0.03138 -0.00380 0.00986 0.00028
C24 1 0.228111 0.293953 0.135767 11.00000 0.03090 0.03811 =
0.04075 -0.00332 0.01085 0.00539
C25 1 0.253236 0.315732 0.066726 11.00000 0.04082 0.05854 =
0.03919 0.00820 0.00895 0.01700
AFIX 43
H25 2 0.178350 0.372329 0.032541 11.00000 -1.50000
AFIX 0
C26 1 0.390267 0.253214 0.048219 11.00000 0.04326 0.06255 =
0.03431 0.00635 0.01338 0.01216
AFIX 43
H26 2 0.406905 0.269337 0.001619 11.00000 -1.50000
AFIX 0
C28 1 0.427714 0.136765 0.312169 11.00000 0.05374 0.08994 =
0.03410 0.00954 0.01182 0.01398
AFIX 137
H28A 2 0.451836 0.025259 0.301640 11.00000 -1.50000
H28B 2 0.389313 0.139969 0.356406 11.00000 -1.50000
H28C 2 0.522775 0.202516 0.317283 11.00000 -1.50000
AFIX 0
C29 1 -0.030307 0.417699 0.106122 11.00000 0.03646 0.05474 =
0.06234 0.00635 0.01086 0.01389
AFIX 137
H29A 2 0.007395 0.516352 0.087317 11.00000 -1.50000
H29B 2 -0.118956 0.443527 0.128101 11.00000 -1.50000
H29C 2 -0.064168 0.340787 0.067392 11.00000 -1.50000
AFIX 0
N1 3 0.990085 -0.172617 0.184969 11.00000 0.03968 0.05023 =
0.03222 0.00497 0.01451 0.01014
H1 2 0.909968 -0.150916 0.199939 11.00000 -1.50000
N4 3 0.874511 -0.032386 0.082455 11.00000 0.03394 0.05458 =
0.03015 0.00595 0.01462 0.01075
H4 2 0.875478 0.002624 0.039936 11.00000 -1.50000
N5 3 0.749940 0.014286 0.114316 11.00000 0.02994 0.04337 =
0.03210 -0.00287 0.01236 0.00341
O27 4 0.308287 0.199673 0.254777 11.00000 0.04009 0.07540 =
0.03262 0.00340 0.01422 0.01500
O28 4 0.096170 0.346761 0.159149 11.00000 0.03788 0.05868 =
0.04783 0.00484 0.01639 0.01818
S3 5 1.155254 -0.160892 0.079984 11.00000 0.03397 0.05264 =
0.04238 0.00832 0.01854 0.00904
HKL F 4

REM T3_20191008 in P2(1)/c
REM R1 = 0.0313 for 2366 Fo > 4sig(Fo) and 0.0362 for all 2666 data
REM 164 parameters refined using 0 restraints

END

WGHT 0.0424 0.3629

REM Highest difference peak 0.219, deepest hole -0.159, 1-sigma level 0.034
Q1 1 0.4927 0.1595 0.1325 11.00000 0.05 0.22

```

Q2 1 1.0874 -0.1043 0.1085 11.00000 0.05 0.20  
 Q3 1 0.5510 0.1229 0.0843 11.00000 0.05 0.19  
 Q4 1 0.4294 0.1742 0.0695 11.00000 0.05 0.18  
 Q5 1 0.3886 0.1550 0.1742 11.00000 0.05 0.18  
 Q6 1 0.2311 0.2859 0.1019 11.00000 0.05 0.17  
 Q7 1 0.3100 0.2990 0.1685 11.00000 0.05 0.17  
 Q8 1 0.2589 0.3260 0.1092 11.00000 0.05 0.16  
 Q9 1 0.4690 0.2316 0.0827 11.00000 0.05 0.16  
 Q10 1 0.4187 0.2131 0.1838 11.00000 0.05 0.16  
 Q11 1 0.3236 0.2715 0.0606 11.00000 0.05 0.15  
 Q12 1 0.3435 0.3116 0.0683 11.00000 0.05 0.14  
 Q13 1 0.6600 0.1877 0.0228 11.00000 0.05 0.14  
 Q14 1 0.9991 -0.1430 0.1495 11.00000 0.05 0.14  
 Q15 1 1.2655 -0.1819 0.1230 11.00000 0.05 0.14  
 Q16 1 1.2364 -0.2546 0.1108 11.00000 0.05 0.14  
 Q17 1 0.3341 0.1989 0.2100 11.00000 0.05 0.13  
 Q18 1 0.3390 0.2816 0.2475 11.00000 0.05 0.13  
 Q19 1 1.0569 -0.1689 0.0389 11.00000 0.05 0.13  
 Q20 1 0.4457 0.3191 0.0009 11.00000 0.05 0.13  
 ;

## CIF for T5

data\_shelx

\_audit\_creation\_method 'SHELXL-2014/7'  
 \_shelx\_SHELXL\_version\_number '2014/7'  
 \_chemical\_name\_systematic ?  
 \_chemical\_name\_common ?  
 \_chemical\_melting\_point ?  
 \_chemical\_formula\_moiety 'C9 H9 Cl2 N3 S'  
 \_chemical\_formula\_sum 'C9 H9 Cl2 N3 S'  
 \_chemical\_formula\_weight 262.15  
  
 loop\_  
 \_atom\_type\_symbol  
 \_atom\_type\_description  
 \_atom\_type\_scatter\_dispersion\_real  
 \_atom\_type\_scatter\_dispersion\_imag  
 \_atom\_type\_scatter\_source  
 'C' 'C' 0.0033 0.0016  
 'International Tables Vol C Tables 4.2.6.8 and 6.1.1.4'  
 'H' 'H' 0.0000 0.0000  
 'International Tables Vol C Tables 4.2.6.8 and 6.1.1.4'  
 'N' 'N' 0.0061 0.0033  
 'International Tables Vol C Tables 4.2.6.8 and 6.1.1.4'  
 'S' 'S' 0.1246 0.1234  
 'International Tables Vol C Tables 4.2.6.8 and 6.1.1.4'  
 'Cl' 'Cl' 0.1484 0.1585  
 'International Tables Vol C Tables 4.2.6.8 and 6.1.1.4'  
  
 \_space\_group\_crystal\_system monoclinic  
 \_space\_group\_IT\_number 15  
 \_space\_group\_name\_H-M\_alt 'C 2/c'  
 \_space\_group\_name\_Hall '-C 2yc'

```
_shelx_space_group_comment
;
```

The symmetry employed for this shelxl refinement is uniquely defined by the following loop, which should always be used as a source of symmetry information in preference to the above space-group names. They are only intended as comments.

```
;
```

```
loop_
_space_group_symop_operation_xyz
'x, y, z'
'-x, y, -z+1/2'
'x+1/2, y+1/2, z'
'-x+1/2, y+1/2, -z+1/2'
'-x, -y, -z'
'x, -y, z-1/2'
'-x+1/2, -y+1/2, -z'
'x+1/2, -y+1/2, z-1/2'
```

```
_cell_length_a      12.8992(10)
_cell_length_b      10.0640(8)
_cell_length_c      18.4826(13)
_cell_angle_alpha   90
_cell_angle_beta    96.754(7)
_cell_angle_gamma   90
_cell_volume         2382.7(3)
_cell_formula_units_Z  8
_cell_measurement_temperature  296(2)
_cell_measurement_reflns_used  754
_cell_measurement_theta_min    3.1440
_cell_measurement_theta_max    27.3160
```

```
_exptl_crystal_description  block
_exptl_crystal_colour       colourless
_exptl_crystal_density_meas  ?
_exptl_crystal_density_method  ?
_exptl_crystal_density_diffn  1.462
_exptl_crystal_F_000        1072
_exptl_transmission_factor_min  ?
_exptl_transmission_factor_max  ?
_exptl_crystal_size_max      0.5
_exptl_crystal_size_mid      0.4
_exptl_crystal_size_min      0.3
_exptl_absorpt_coefficient_mu  0.690
_shelx_estimated_absorpt_T_min  ?
_shelx_estimated_absorpt_T_max  ?
_exptl_absorpt_correction_T_min  0.24257
_exptl_absorpt_correction_T_max  1.00000
_exptl_absorpt_correction_type  multi-scan
_exptl_absorpt_process_details
```

```
;
```

CrysAlisPro 1.171.40.53 (Rigaku Oxford Diffraction, 2019)  
Empirical absorption correction using spherical harmonics,  
implemented in SCALE3 ABSPACK scaling algorithm.

```
;
```

```
_exptl_absorpt_special_details  ?
```

```

_diffrn_ambient_temperature    296(2)
_diffrn_radiation_wavelength    0.71073
_diffrn_radiation_type          MoK\alpha
_diffrn_source                  ?
_diffrn_measurement_device_type 'KM4 CCD four-circle diffractometer'
_diffrn_measurement_method      ?
_diffrn_detector_area_resol_mean ?
_diffrn_reflns_number           6897
_diffrn_reflns_av_unetI/netI    0.0204
_diffrn_reflns_av_R_equivalents 0.0187
_diffrn_reflns_limit_h_min      -15
_diffrn_reflns_limit_h_max      15
_diffrn_reflns_limit_k_min      -8
_diffrn_reflns_limit_k_max      12
_diffrn_reflns_limit_l_min      -18
_diffrn_reflns_limit_l_max      22
_diffrn_reflns_theta_min        2.219
_diffrn_reflns_theta_max        28.065
_diffrn_reflns_theta_full       25.242
_diffrn_measured_fraction_theta_max 0.860
_diffrn_measured_fraction_theta_full 1.000
_diffrn_reflns_Laue_measured_fraction_max 0.860
_diffrn_reflns_Laue_measured_fraction_full 1.000
_diffrn_reflns_point_group_measured_fraction_max 0.860
_diffrn_reflns_point_group_measured_fraction_full 1.000
_reflns_number_total            2493
_reflns_number_gt               1981
_reflns_threshold_expression     'I > 2\sigma(I)'
_reflns_Friedel_coverage        0.000
_reflns_Friedel_fraction_max    .
_reflns_Friedel_fraction_full   .

```

\_reflns\_special\_details

;

Reflections were merged by SHELXL according to the crystal class for the calculation of statistics and refinement.

\_reflns\_Friedel\_fraction is defined as the number of unique Friedel pairs measured divided by the number that would be possible theoretically, ignoring centric projections and systematic absences.

;

\_computing\_data\_collection

;

CrysAlisPro, Agilent Technologies,  
Version 1.171.37.35h (release 09-02-2015 CrysAlis171 .NET)  
(compiled Feb 9 2015,16:26:32)

;

\_computing\_cell\_refinement

;

CrysAlisPro, Agilent Technologies,  
Version 1.171.37.35h (release 09-02-2015 CrysAlis171 .NET)  
(compiled Feb 9 2015,16:26:32)

;

\_computing\_data\_reduction

;

CrysAlisPro, Agilent Technologies,  
Version 1.171.37.35h (release 09-02-2015 CrysAlis171 .NET)  
(compiled Feb 9 2015,16:26:32)

```
;  
_computing_structure_solution 'SHELXS-2013/1 (Sheldrick, 2013)  
_computing_structure_refinement 'SHELXL-2014/7 (Sheldrick, 2014)  
_computing_molecular_graphics ?  
_computing_publication_material ?  
_refine_special_details ?  
_refine_ls_structure_factor_coef Fsqd  
_refine_ls_matrix_type full  
_refine_ls_weighting_scheme calc  
_refine_ls_weighting_details  
'w=1/[s^2*(Fo^2)+(0.0665P)^2+2.3540P] where P=(Fo^2+2Fc^2)/3'  
_atom_sites_solution_primary refxyz  
_atom_sites_solution_secondary ?  
_atom_sites_solution_hydrogens mixed  
_refine_ls_hydrogen_treatment mixed  
_refine_ls_extinction_method none  
_refine_ls_extinction_coef .  
_refine_ls_number_reflns 2493  
_refine_ls_number_parameters 143  
_refine_ls_number_restraints 0  
_refine_ls_R_factor_all 0.0568  
_refine_ls_R_factor_gt 0.0439  
_refine_ls_wR_factor_ref 0.1379  
_refine_ls_wR_factor_gt 0.1266  
_refine_ls_goodness_of_fit_ref 1.066  
_refine_ls_restrained_S_all 1.066  
_refine_ls_shift/su_max 0.001  
_refine_ls_shift/su_mean 0.000
```

```
loop_  
_atom_site_label  
_atom_site_type_symbol  
_atom_site_fract_x  
_atom_site_fract_y  
_atom_site_fract_z  
_atom_site_U_iso_or_equiv  
_atom_site_adp_type  
_atom_site_occupancy  
_atom_site_site_symmetry_order  
_atom_site_calc_flag  
_atom_site_refinement_flags_posn  
_atom_site_refinement_flags_adp  
_atom_site_refinement_flags_occupancy  
_atom_site_disorder_assembly  
_atom_site_disorder_group  
C2 C 0.16570(19) 0.9349(3) 0.74732(13) 0.0479(6) Uani 1 1 d . . . . .  
C6 C 0.07636(19) 0.8279(3) 0.90895(13) 0.0500(6) Uani 1 1 d . . . . .  
H6 H 0.0247 0.8922 0.9098 0.075 Uiso 1 1 calc R U . . . . .  
C7 C 0.3129(3) 0.8474(4) 0.68877(18) 0.0766(9) Uani 1 1 d . . . . .  
H7A H 0.2744 0.8420 0.6411 0.115 Uiso 1 1 calc R U . . . . .  
H7B H 0.3593 0.7729 0.6962 0.115 Uiso 1 1 calc R U . . . . .  
H7C H 0.3526 0.9283 0.6928 0.115 Uiso 1 1 calc R U . . . . .  
C21 C 0.09089(18) 0.7301(2) 0.96791(13) 0.0456(5) Uani 1 1 d . . . . .  
C22 C 0.16299(19) 0.6274(3) 0.96739(13) 0.0474(6) Uani 1 1 d . . . . .
```

H22 H 0.2045 0.6206 0.9296 0.071 Uiso 1 1 calc R U . . .  
 C23 C 0.1726(2) 0.5352(3) 1.02344(14) 0.0514(6) Uani 1 1 d . . . . .  
 C24 C 0.1105(2) 0.5437(3) 1.07997(14) 0.0550(7) Uani 1 1 d . . . . .  
 C25 C 0.0411(2) 0.6462(4) 1.08106(15) 0.0660(8) Uani 1 1 d . . . . .  
 H25 H 0.0007 0.6537 1.1194 0.099 Uiso 1 1 calc R U . . .  
 C26 C 0.0306(2) 0.7386(3) 1.02553(15) 0.0615(7) Uani 1 1 d . . . . .  
 H26 H -0.0173 0.8074 1.0266 0.092 Uiso 1 1 calc R U . . .  
 N1 N 0.24033(19) 0.8462(2) 0.74377(13) 0.0563(6) Uani 1 1 d . . . . .  
 H1 H 0.252(3) 0.793(4) 0.7728(19) 0.085 Uiso 1 1 d . U . . .  
 N4 N 0.11103(18) 0.9260(2) 0.80540(13) 0.0534(6) Uani 1 1 d . . . . .  
 H4 H 0.064(3) 0.974(4) 0.809(2) 0.080 Uiso 1 1 d . U . . .  
 N5 N 0.13225(15) 0.8277(2) 0.85666(11) 0.0477(5) Uani 1 1 d . . . . .  
 S3 S 0.13423(6) 1.05573(7) 0.68487(4) 0.0590(2) Uani 1 1 d . . . . .  
 Cl23 Cl 0.26246(8) 0.40935(8) 1.02152(5) 0.0844(3) Uani 1 1 d . . . . .  
 Cl24 Cl 0.11927(8) 0.42480(9) 1.14854(4) 0.0825(3) Uani 1 1 d . . . . .

loop\_

\_atom\_site\_aniso\_label  
 \_atom\_site\_aniso\_U\_11  
 \_atom\_site\_aniso\_U\_22  
 \_atom\_site\_aniso\_U\_33  
 \_atom\_site\_aniso\_U\_23  
 \_atom\_site\_aniso\_U\_13  
 \_atom\_site\_aniso\_U\_12  
 C2 0.0512(13) 0.0475(14) 0.0443(13) 0.0008(10) 0.0036(10) -0.0135(11)  
 C6 0.0466(13) 0.0515(15) 0.0521(14) 0.0039(11) 0.0065(11) 0.0035(11)  
 C7 0.087(2) 0.080(2) 0.0699(19) 0.0020(17) 0.0361(17) 0.0058(18)  
 C21 0.0420(12) 0.0499(14) 0.0443(12) 0.0019(10) 0.0031(9) -0.0032(10)  
 C22 0.0509(13) 0.0480(14) 0.0435(13) -0.0031(11) 0.0062(10) -0.0035(11)  
 C23 0.0576(14) 0.0426(13) 0.0513(14) -0.0045(11) -0.0041(11) -0.0020(11)  
 C24 0.0588(15) 0.0628(17) 0.0414(14) 0.0043(12) -0.0031(11) -0.0187(13)  
 C25 0.0596(16) 0.093(2) 0.0473(15) 0.0061(15) 0.0160(12) -0.0056(16)  
 C26 0.0516(15) 0.074(2) 0.0603(17) 0.0052(14) 0.0135(12) 0.0072(13)  
 N1 0.0652(14) 0.0538(14) 0.0520(13) 0.0053(10) 0.0149(11) -0.0013(11)  
 N4 0.0517(12) 0.0561(14) 0.0529(13) 0.0126(10) 0.0078(10) 0.0051(10)  
 N5 0.0469(11) 0.0482(12) 0.0473(11) 0.0070(9) 0.0029(9) -0.0017(9)  
 S3 0.0660(4) 0.0533(4) 0.0566(4) 0.0129(3) 0.0023(3) -0.0137(3)  
 Cl23 0.1153(7) 0.0582(5) 0.0789(6) 0.0015(4) 0.0077(5) 0.0310(4)  
 Cl24 0.1014(6) 0.0856(6) 0.0561(5) 0.0224(4) -0.0099(4) -0.0293(5)

\_geom\_special\_details

;  
 All esds (except the esd in the dihedral angle between two l.s. planes)  
 are estimated using the full covariance matrix. The cell esds are taken  
 into account individually in the estimation of esds in distances, angles  
 and torsion angles; correlations between esds in cell parameters are only  
 used when they are defined by crystal symmetry. An approximate (isotropic)  
 treatment of cell esds is used for estimating esds involving l.s. planes.  
 ;

loop\_

\_geom\_bond\_atom\_site\_label\_1  
 \_geom\_bond\_atom\_site\_label\_2  
 \_geom\_bond\_distance  
 \_geom\_bond\_site\_symmetry\_2  
 \_geom\_bond\_publ\_flag  
 C2 N1 1.320(4) . ?

C2 N4 1.355(3) . ?  
C2 S3 1.693(3) . ?  
C6 N5 1.272(3) . ?  
C6 C21 1.464(3) . ?  
C6 H6 0.9300 . ?  
C7 N1 1.461(4) . ?  
C7 H7A 0.9600 . ?  
C7 H7B 0.9600 . ?  
C7 H7C 0.9600 . ?  
C21 C22 1.391(4) . ?  
C21 C26 1.393(4) . ?  
C22 C23 1.385(4) . ?  
C22 H22 0.9300 . ?  
C23 C24 1.392(4) . ?  
C23 Cl23 1.720(3) . ?  
C24 C25 1.368(4) . ?  
C24 Cl24 1.737(3) . ?  
C25 C26 1.379(4) . ?  
C25 H25 0.9300 . ?  
C26 H26 0.9300 . ?  
N1 H1 0.76(4) . ?  
N4 N5 1.375(3) . ?  
N4 H4 0.79(4) . ?

loop\_

\_geom\_angle\_atom\_site\_label\_1  
\_geom\_angle\_atom\_site\_label\_2  
\_geom\_angle\_atom\_site\_label\_3  
\_geom\_angle  
\_geom\_angle\_site\_symmetry\_1  
\_geom\_angle\_site\_symmetry\_3  
\_geom\_angle\_publ\_flag  
N1 C2 N4 116.5(2) . . ?  
N1 C2 S3 124.7(2) . . ?  
N4 C2 S3 118.8(2) . . ?  
N5 C6 C21 122.0(2) . . ?  
N5 C6 H6 119.0 . . ?  
C21 C6 H6 119.0 . . ?  
N1 C7 H7A 109.5 . . ?  
N1 C7 H7B 109.5 . . ?  
H7A C7 H7B 109.5 . . ?  
N1 C7 H7C 109.5 . . ?  
H7A C7 H7C 109.5 . . ?  
H7B C7 H7C 109.5 . . ?  
C22 C21 C26 119.0(2) . . ?  
C22 C21 C6 121.4(2) . . ?  
C26 C21 C6 119.6(2) . . ?  
C23 C22 C21 119.6(2) . . ?  
C23 C22 H22 120.2 . . ?  
C21 C22 H22 120.2 . . ?  
C22 C23 C24 120.7(2) . . ?  
C22 C23 Cl23 118.6(2) . . ?  
C24 C23 Cl23 120.6(2) . . ?  
C25 C24 C23 119.6(2) . . ?  
C25 C24 Cl24 119.7(2) . . ?  
C23 C24 Cl24 120.8(2) . . ?  
C24 C25 C26 120.2(3) . . ?



C24 C25 H25 119.9 . . ?  
C26 C25 H25 119.9 . . ?  
C25 C26 C21 120.9(3) . . ?  
C25 C26 H26 119.6 . . ?  
C21 C26 H26 119.6 . . ?  
C2 N1 C7 124.0(3) . . ?  
C2 N1 H1 121(3) . . ?  
C7 N1 H1 114(3) . . ?  
C2 N4 N5 120.9(2) . . ?  
C2 N4 H4 120(3) . . ?  
N5 N4 H4 119(3) . . ?  
C6 N5 N4 116.0(2) . . ?

loop\_

\_geom\_torsion\_atom\_site\_label\_1  
\_geom\_torsion\_atom\_site\_label\_2  
\_geom\_torsion\_atom\_site\_label\_3  
\_geom\_torsion\_atom\_site\_label\_4  
\_geom\_torsion  
\_geom\_torsion\_site\_symmetry\_1  
\_geom\_torsion\_site\_symmetry\_2  
\_geom\_torsion\_site\_symmetry\_3  
\_geom\_torsion\_site\_symmetry\_4  
\_geom\_torsion\_publ\_flag  
N5 C6 C21 C22 -3.6(4) . . . . ?  
N5 C6 C21 C26 177.1(3) . . . . ?  
C26 C21 C22 C23 0.7(4) . . . . ?  
C6 C21 C22 C23 -178.6(2) . . . . ?  
C21 C22 C23 C24 0.4(4) . . . . ?  
C21 C22 C23 C123 -179.92(19) . . . . ?  
C22 C23 C24 C25 -1.6(4) . . . . ?  
C123 C23 C24 C25 178.7(2) . . . . ?  
C22 C23 C24 C124 177.68(19) . . . . ?  
C123 C23 C24 C124 -2.0(3) . . . . ?  
C23 C24 C25 C26 1.7(4) . . . . ?  
C124 C24 C25 C26 -177.6(2) . . . . ?  
C24 C25 C26 C21 -0.6(4) . . . . ?  
C22 C21 C26 C25 -0.6(4) . . . . ?  
C6 C21 C26 C25 178.6(3) . . . . ?  
N4 C2 N1 C7 -174.5(3) . . . . ?  
S3 C2 N1 C7 5.9(4) . . . . ?  
N1 C2 N4 N5 -1.1(4) . . . . ?  
S3 C2 N4 N5 178.55(18) . . . . ?  
C21 C6 N5 N4 -179.3(2) . . . . ?  
C2 N4 N5 C6 -179.8(2) . . . . ?

\_refine\_diff\_density\_max 0.559  
\_refine\_diff\_density\_min -0.344  
\_refine\_diff\_density\_rms 0.048

\_shelx\_res\_file

;

shelx.res created by SHELXL-2014/7

TITL T5\_20191015 in C2/c

CELL 0.71073 12.8992 10.0640 18.4826 90.000 96.754 90.000  
 ZERR 8.00 0.0010 0.0008 0.0013 0.000 0.007 0.000  
 LATT 7  
 SYMM - X, Y, 1/2 - Z  
 SFAC C H N S CL  
 UNIT 72 72 24 8 16  
 MERG 2  
 FMAP 2  
 PLAN -10  
 ACTA  
 BOND \$H  
 CONF  
 L.S. 30  
 WGHT 0.066500 2.354000  
 FVAR 2.52979  
 MOLE 1  
 C2 1 0.165703 0.934857 0.747320 11.00000 0.05125 0.04754 =  
     0.04427 0.00079 0.00358 -0.01352  
 C6 1 0.076356 0.827928 0.908951 11.00000 0.04660 0.05149 =  
     0.05210 0.00386 0.00645 0.00346  
 AFIX 43  
 H6 2 0.024689 0.892181 0.909764 11.00000 -1.50000  
 AFIX 0  
 C7 1 0.312882 0.847437 0.688771 11.00000 0.08681 0.07955 =  
     0.06986 0.00203 0.03614 0.00584  
 AFIX 137  
 H7A 2 0.274412 0.841998 0.641137 11.00000 -1.50000  
 H7B 2 0.359308 0.772853 0.696217 11.00000 -1.50000  
 H7C 2 0.352618 0.928302 0.692811 11.00000 -1.50000  
 AFIX 0  
 C21 1 0.090886 0.730084 0.967914 11.00000 0.04203 0.04995 =  
     0.04426 0.00188 0.00311 -0.00316  
 C22 1 0.162991 0.627359 0.967388 11.00000 0.05085 0.04797 =  
     0.04348 -0.00307 0.00621 -0.00346  
 AFIX 43  
 H22 2 0.204452 0.620620 0.929649 11.00000 -1.50000  
 AFIX 0  
 C23 1 0.172617 0.535202 1.023439 11.00000 0.05765 0.04263 =  
     0.05133 -0.00454 -0.00407 -0.00198  
 C24 1 0.110514 0.543726 1.079967 11.00000 0.05875 0.06278 =  
     0.04145 0.00433 -0.00306 -0.01872  
 C25 1 0.041052 0.646234 1.081056 11.00000 0.05964 0.09346 =  
     0.04731 0.00607 0.01597 -0.00564  
 AFIX 43  
 H25 2 0.000706 0.653685 1.119379 11.00000 -1.50000  
 AFIX 0  
 C26 1 0.030639 0.738559 1.025534 11.00000 0.05156 0.07427 =  
     0.06035 0.00520 0.01354 0.00725  
 AFIX 43  
 H26 2 -0.017255 0.807403 1.026580 11.00000 -1.50000  
 AFIX 0  
 N1 3 0.240326 0.846156 0.743769 11.00000 0.06521 0.05378 =  
     0.05196 0.00532 0.01486 -0.00133  
 H1 2 0.251674 0.792910 0.772806 11.00000 -1.50000  
 N4 3 0.111026 0.926031 0.805404 11.00000 0.05172 0.05610 =  
     0.05291 0.01258 0.00781 0.00511  
 H4 2 0.063833 0.974032 0.808952 11.00000 -1.50000

N5 3 0.132246 0.827714 0.856657 11.00000 0.04695 0.04824 =  
0.04733 0.00698 0.00292 -0.00167  
S3 4 0.134225 1.055731 0.684875 11.00000 0.06602 0.05328 =  
0.05664 0.01286 0.00232 -0.01371  
CL23 5 0.262456 0.409351 1.021518 11.00000 0.11529 0.05822 =  
0.07886 0.00149 0.00765 0.03099  
CL24 5 0.119271 0.424798 1.148541 11.00000 0.10141 0.08560 =  
0.05606 0.02240 -0.00990 -0.02930  
HKL 4

REM T5\_20191015 in C2/c  
REM R1 = 0.0439 for 1981 Fo > 4sig(Fo) and 0.0568 for all 2493 data  
REM 143 parameters refined using 0 restraints

END

WGHT 0.0653 2.4399

REM Highest difference peak 0.559, deepest hole -0.344, 1-sigma level 0.048

Q1 1 0.0130 0.5889 1.1483 11.00000 0.05 0.56  
Q2 1 0.1869 0.3654 1.1163 11.00000 0.05 0.53  
Q3 1 0.0606 0.5799 1.0632 11.00000 0.05 0.21  
Q4 1 0.0958 1.0978 0.7081 11.00000 0.05 0.21  
Q5 1 0.1240 0.6857 0.9687 11.00000 0.05 0.19  
Q6 1 0.0841 0.7772 0.9407 11.00000 0.05 0.19  
Q7 1 0.0612 0.4755 1.1436 11.00000 0.05 0.19  
Q8 1 0.1447 0.5058 1.0579 11.00000 0.05 0.16  
Q9 1 0.1017 0.5188 1.0972 11.00000 0.05 0.15  
Q10 1 0.2041 0.4886 1.0169 11.00000 0.05 0.15

;

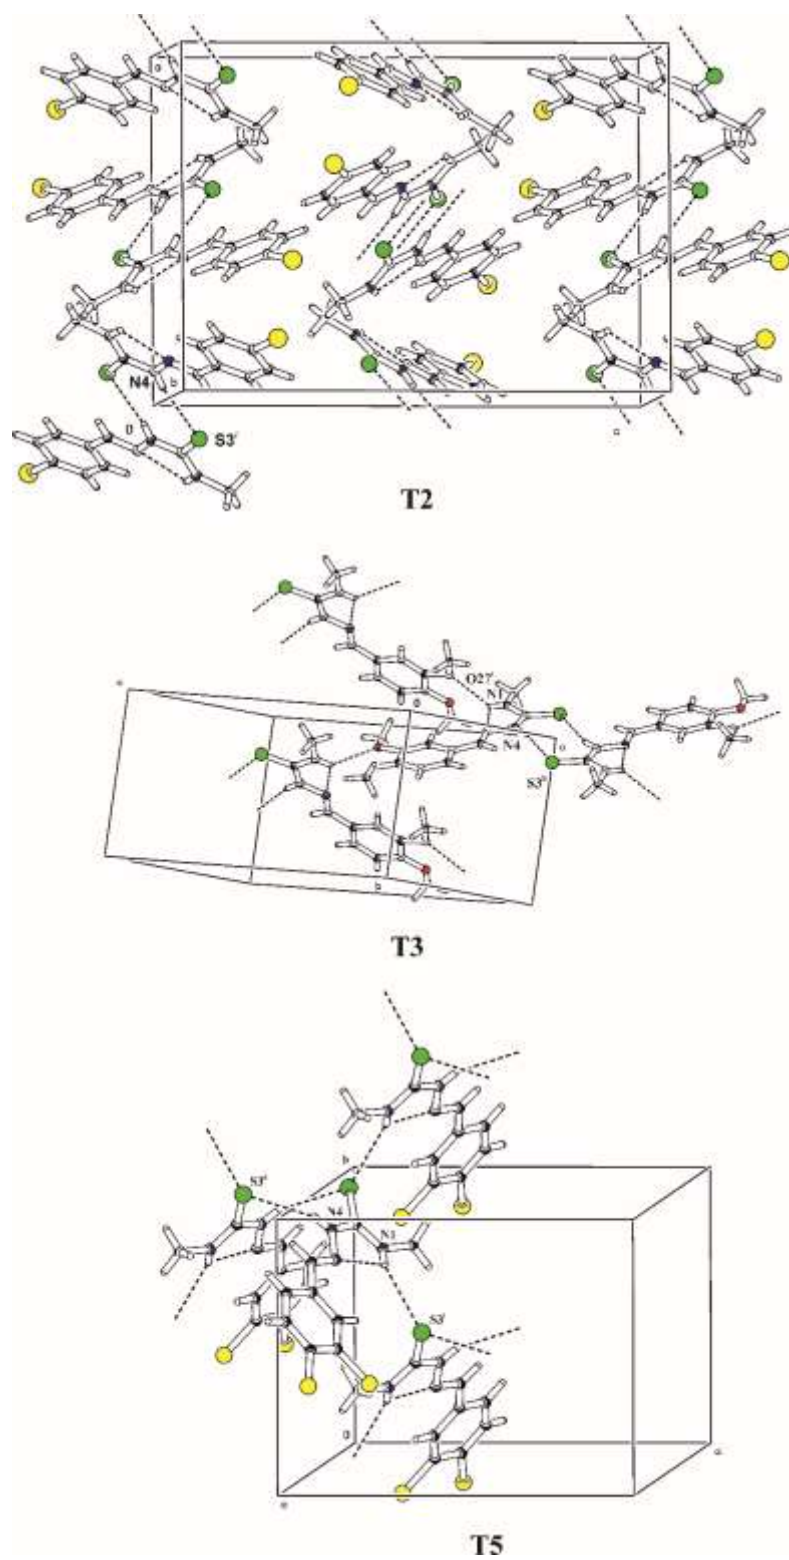

**Figure 1S.** The molecular packing of **T2**, **T3** and **T5**. Dashed lines indicate intermolecular hydrogen bonds; **T2**  $i = 1-x, -y, 1-z$ ; **T3**:  $i = 1-x, -1/2+y, 1/2-z$ ;  $ii = 2-x, -y, -z$ ; **T5**:  $i = 1/2-x, -1/2+y, 3/2-z$ ;  $ii = -x, y, 2-z$ .

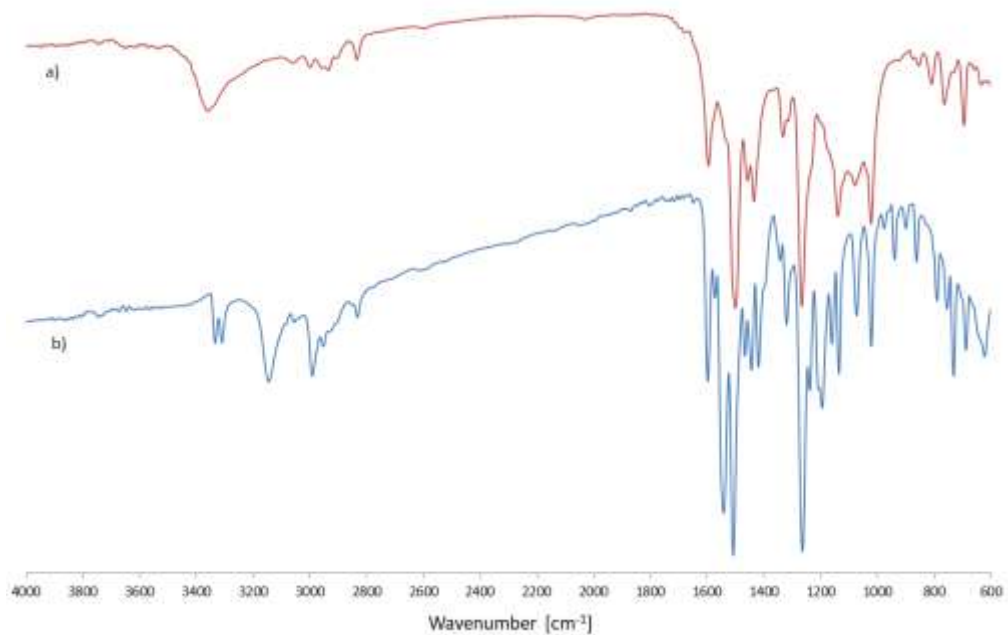

**Figure 2S.** Infrared spectra of a) Cu(T1)Cl<sub>2</sub> and b) T1

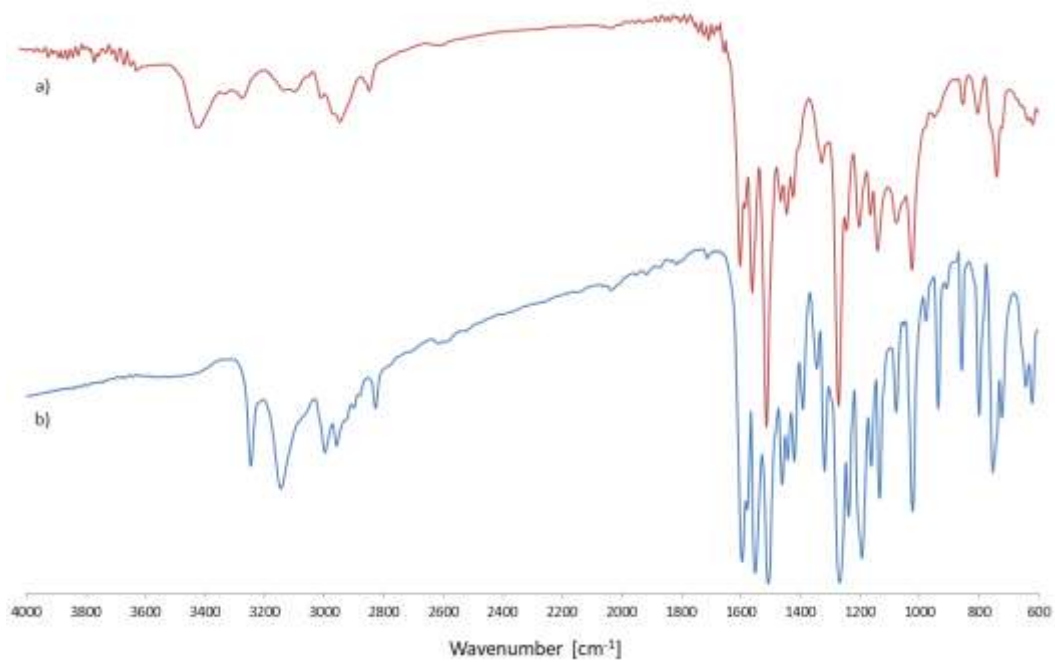

**Figure 3S.** Infrared spectra of a) Cu(T10)<sub>2</sub>Cl<sub>2</sub> and b) T10

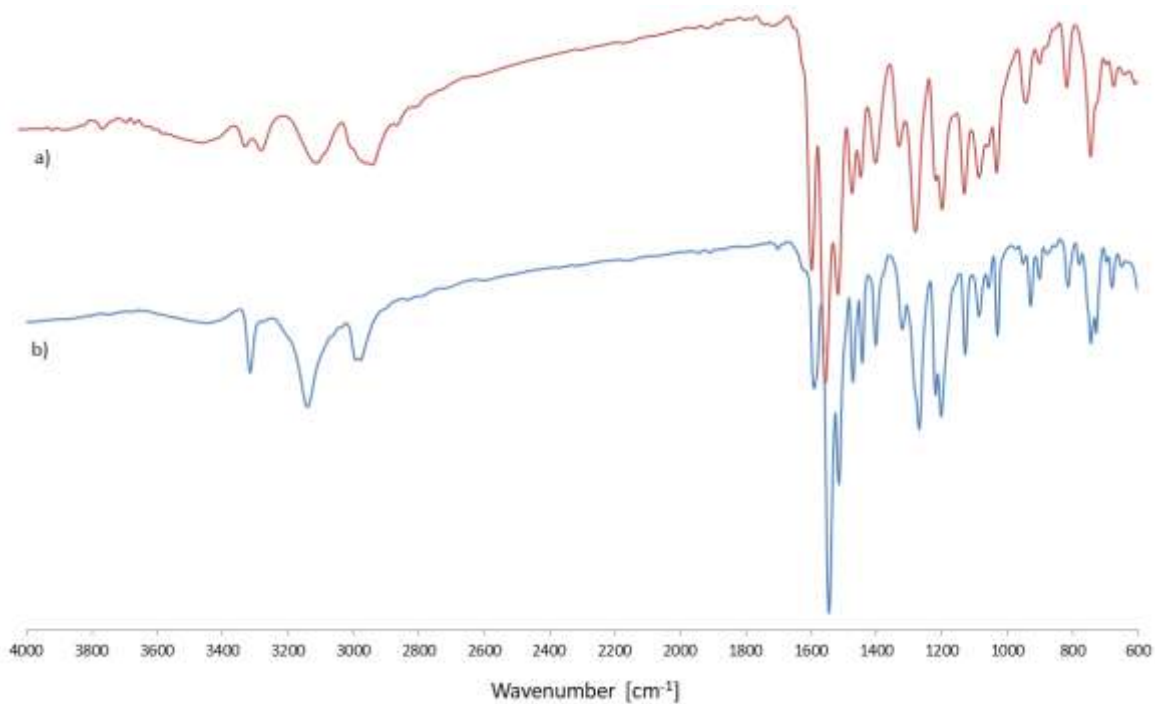

**Figure 4S.** Infrared spectra of a)  $\text{Cu}(\text{T12})_2\text{Cl}_2$  and b) T12

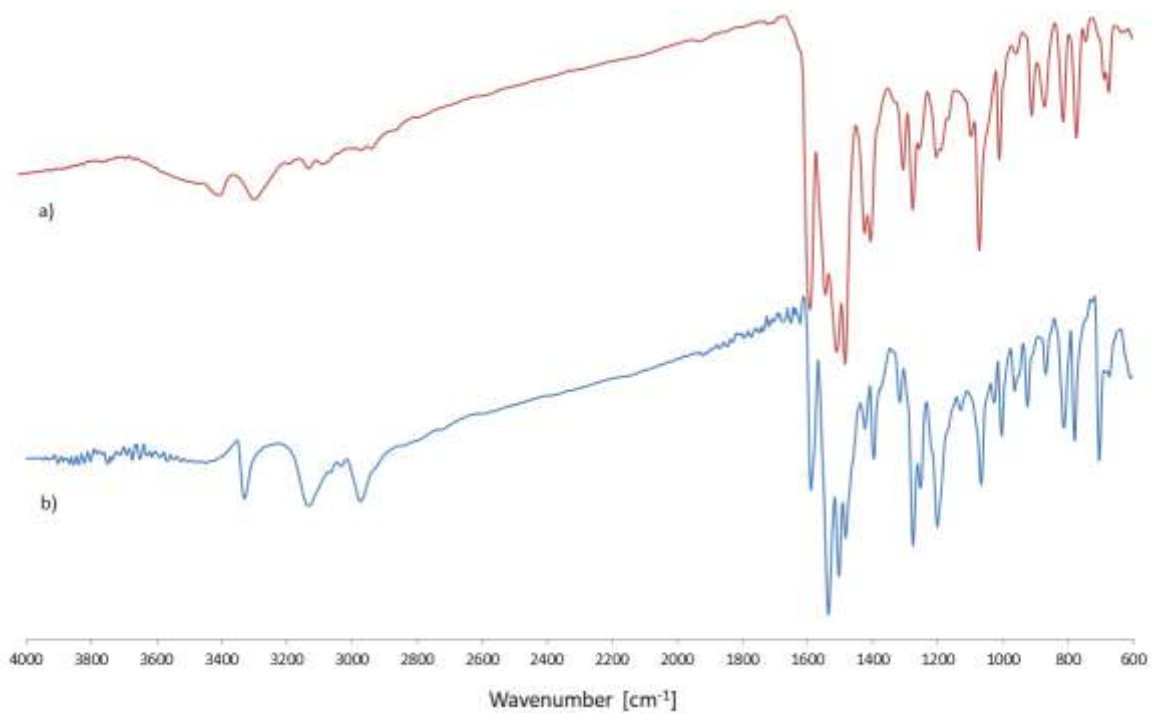

**Figure 5S.** Infrared spectra of a)  $\text{Cu}(\text{T13})\text{Cl}_2$  and b) T13

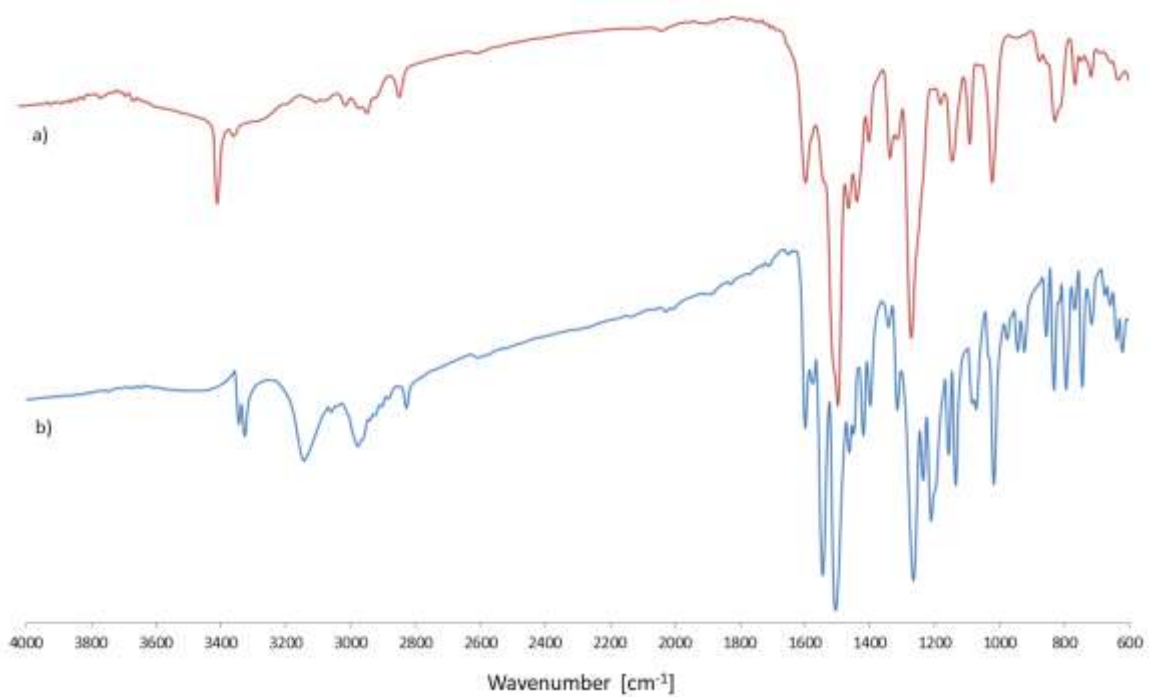

**Figure 6S.** Infrared spectra of a)  $\text{Cu(T16)Cl}_2$  and b) T16

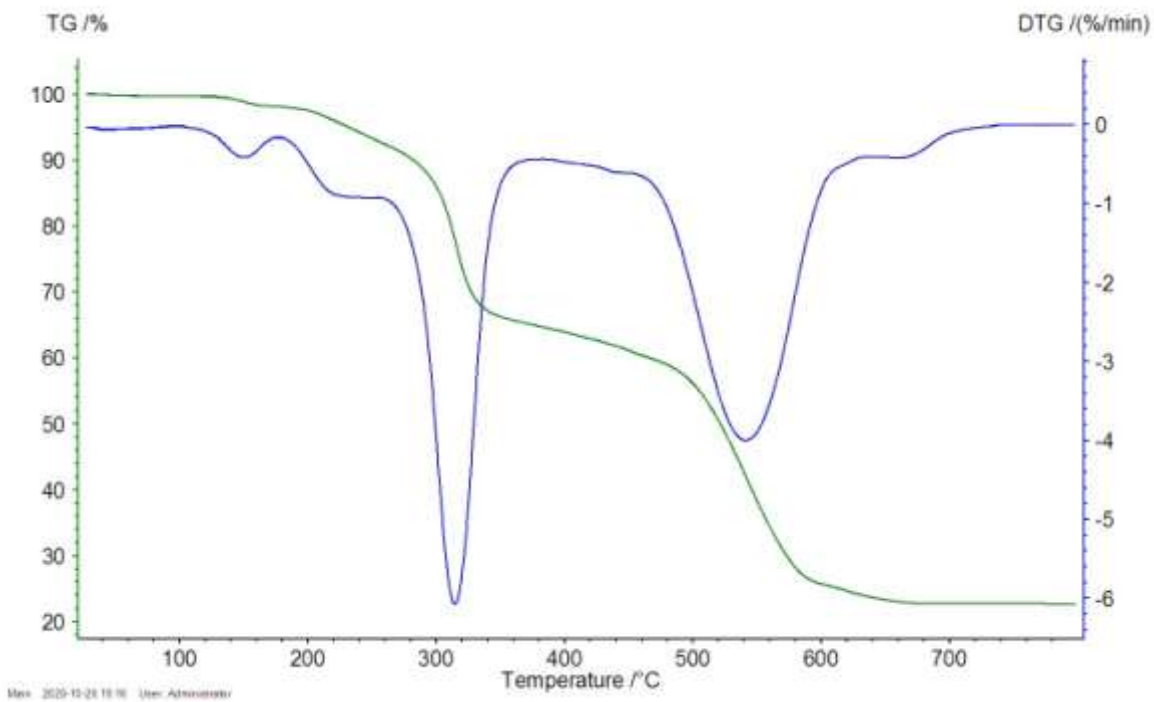

**Figure 7S.** TG and DTG curves of  $\text{Cu(T1)Cl}_2$  in air atmosphere

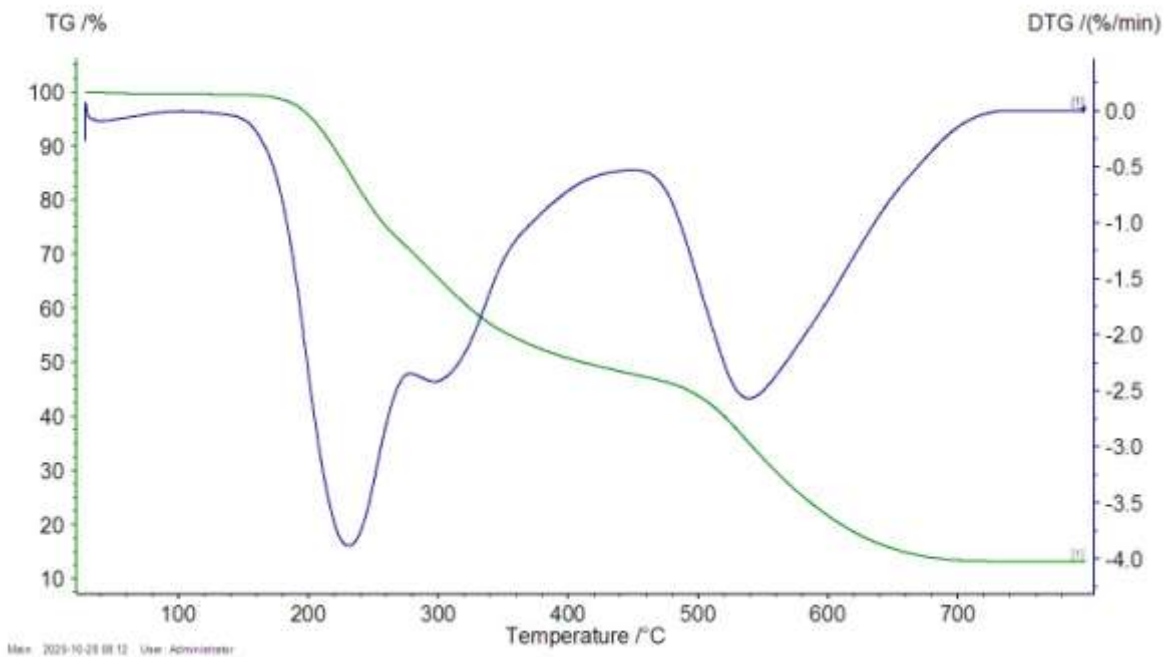

**Figure 8S.** TG and DTG curves of  $\text{Cu}(\text{T10})_2\text{Cl}_2$  in air atmosphere

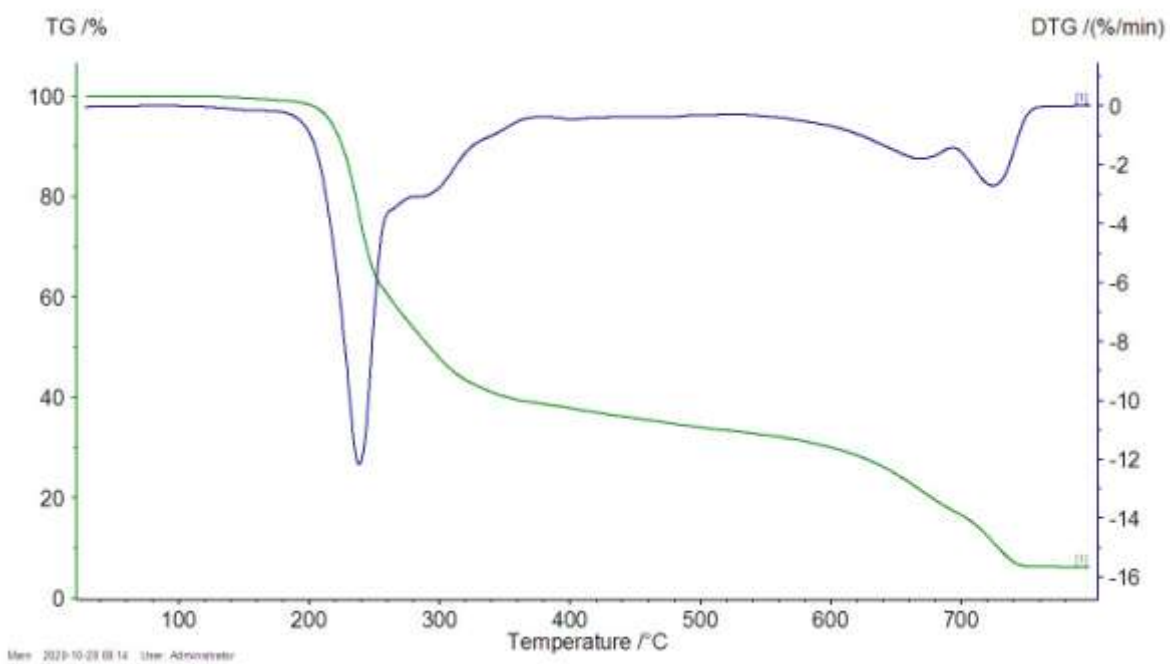

**Figure 9S.** TG and DTG curves of  $\text{Cu}(\text{T12})_2\text{Cl}_2$  in air atmosphere



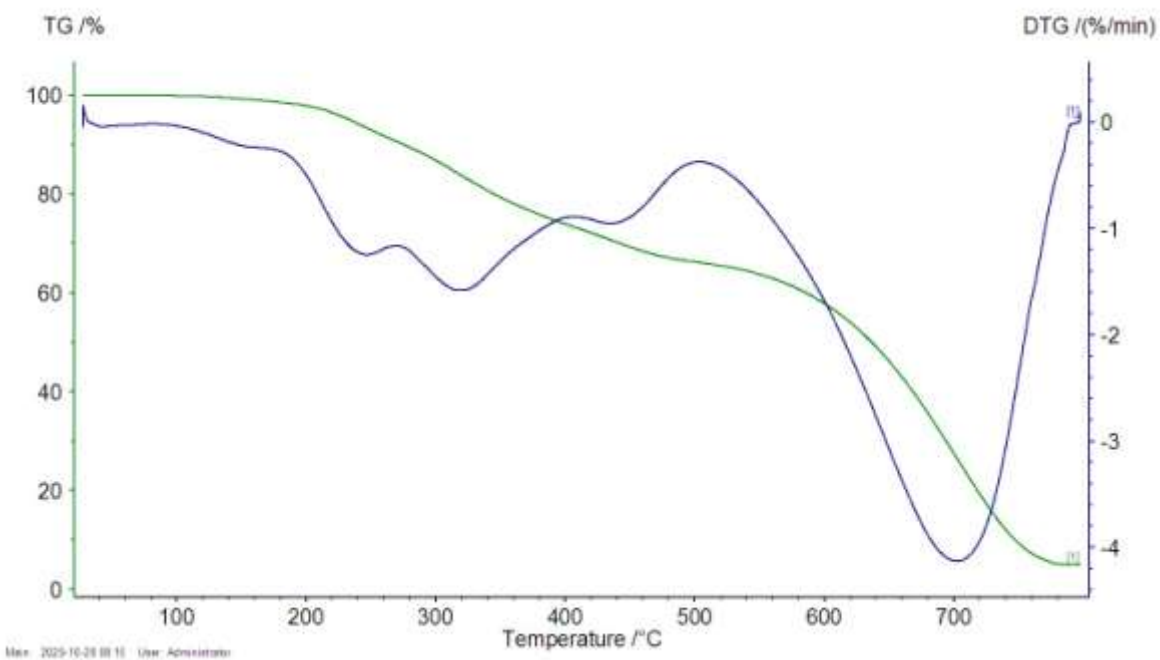

**Figure 10S.** TG and DTG curves of Cu(T13)Cl<sub>2</sub> in air atmosphere

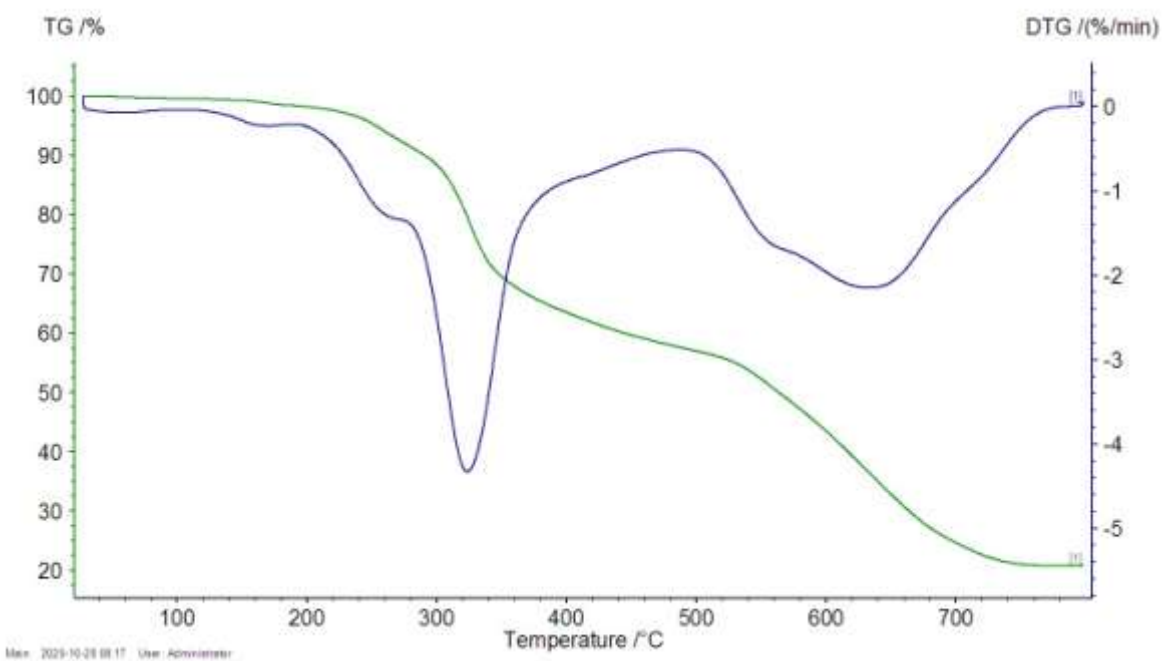

**Figure 11S.** TG and DTG curves of Cu(T16)Cl<sub>2</sub> in air atmosphere

**Table 1S. Spectrometry mass (MS) for new compounds.**

| LP. | Compound structure                                                                                 | Compound formula, theoretical and measured monoisotopic mass, and mass difference in ppm                                                                                                                        | Theoretical monoisotopic mass of protonated ion and acquired LC/QTOF HRMS spectra                                                                                                               |
|-----|----------------------------------------------------------------------------------------------------|-----------------------------------------------------------------------------------------------------------------------------------------------------------------------------------------------------------------|-------------------------------------------------------------------------------------------------------------------------------------------------------------------------------------------------|
| T3  | 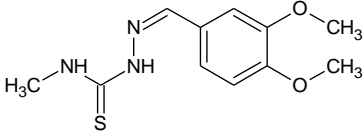 <p>M=253,32</p>  | <p>C<sub>11</sub> H<sub>15</sub> N<sub>3</sub> O<sub>2</sub>S<br/>           Calculated monoisotopic mass: 253.0885<br/>           Measured monoisotopic mass: 253.0889<br/>           Mass error: 1.55 ppm</p> | <p>Theoretical monoisotopic mass of [M+H]<sup>+</sup>: 254.0958</p>  <p>Counts vs. Mass-to-Charge (m/z)</p>  |
| T4  |  <p>M=223,31</p> | <p>C<sub>10</sub>H<sub>14</sub>N<sub>4</sub>S<br/>           Calculated monoisotopic mass: 222.0939<br/>           Measured monoisotopic mass: 222.0944<br/>           Mass error: 2.14 ppm</p>                 | <p>Theoretical monoisotopic mass of [M+H]<sup>+</sup>: 223.1012</p>  <p>Counts vs. Mass-to-Charge (m/z)</p> |

|           |                                                                                                   |                                                                                                                                                                                                             |                                                                                                                                                          |
|-----------|---------------------------------------------------------------------------------------------------|-------------------------------------------------------------------------------------------------------------------------------------------------------------------------------------------------------------|----------------------------------------------------------------------------------------------------------------------------------------------------------|
| <p>T5</p> | 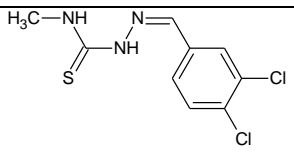 <p>M=262,26</p> | <p>C<sub>9</sub>H<sub>9</sub>N<sub>3</sub>SCl<sub>2</sub><br/>           Calculated monoisotopic mass: 260.9894<br/>           Measured monoisotopic mass: 260.9896<br/>           Mass error: 0.55 ppm</p> | <p>Theoretical monoisotopic mass of [M+H]<sup>+</sup>: 261.9967</p>   |
| <p>T6</p> |  <p>M=348,26</p> | <p>C<sub>15</sub>H<sub>14</sub>N<sub>3</sub>SBr<br/>           Calculated monoisotopic mass: 347.0092<br/>           Measured monoisotopic mass: 347.0096<br/>           Mass error: 1.14 ppm</p>           | <p>Theoretical monoisotopic mass of [M+H]<sup>+</sup>: 348.0165</p>  |

|           |                                                                                                     |                                                                                                                                                                                                                      |                                                                                                                                                                                                                                                                                      |
|-----------|-----------------------------------------------------------------------------------------------------|----------------------------------------------------------------------------------------------------------------------------------------------------------------------------------------------------------------------|--------------------------------------------------------------------------------------------------------------------------------------------------------------------------------------------------------------------------------------------------------------------------------------|
| <p>T7</p> | 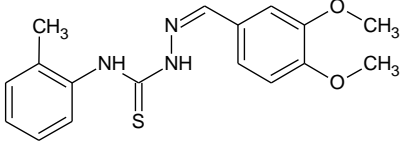 <p>M=329,41</p>   | <p><b>C<sub>17</sub>H<sub>19</sub>N<sub>3</sub>O<sub>2</sub>S</b><br/>           Calculated monoisotopic mass: 329.1198<br/>           Measured monoisotopic mass: 329.1202<br/>           Mass error: 1.31 ppm</p>  |  <p>Cpd 1: C<sub>17</sub>H<sub>19</sub>N<sub>3</sub>O<sub>2</sub>S: +ESI Scan (rt: 3.823 min) Frag=350.0V T7.d Subtract</p>                                                                       |
| <p>T8</p> |  <p>M=338,25</p>   | <p><b>C<sub>15</sub>H<sub>13</sub>N<sub>3</sub>SCl<sub>2</sub></b><br/>           Calculated monoisotopic mass: 337.0207<br/>           Measured monoisotopic mass: 337.0211<br/>           Mass error: 1.23 ppm</p> | <p>Theoretical monoisotopic mass of [M+H]<sup>+</sup>: 338.0280</p>  <p>Cpd 1: C<sub>15</sub>H<sub>13</sub>Cl<sub>2</sub>N<sub>3</sub>S: +ESI Scan (rt: 4.925 min) Frag=350.0V T8.d Subtract</p> |
| <p>T9</p> |  <p>M=368,68</p> | <p><b>C<sub>14</sub>H<sub>11</sub>N<sub>3</sub>SClBr</b><br/>           Calculated monoisotopic mass: 366.9546<br/>           Measured monoisotopic mass: 366.9545<br/>           Mass error: -0.03 ppm</p>          | <p>Theoretical monoisotopic mass of [M+H]<sup>+</sup>: 367.9618</p>                                                                                                                                                                                                                  |

|     |                 |                                                                                                                                                                                                                       |  |
|-----|-----------------|-----------------------------------------------------------------------------------------------------------------------------------------------------------------------------------------------------------------------|--|
|     |                 |                                                                                                                                                                                                                       |  |
| T10 | <p>M=349,84</p> | <p><b>C<sub>16</sub>H<sub>16</sub>N<sub>3</sub>O<sub>2</sub>SCl</b><br/>           Calculated monoisotopic mass: 349.0652<br/>           Measured monoisotopic mass: 349.0653<br/>           Mass error: 0.35 ppm</p> |  |
| T11 | <p>M=303,80</p> | <p><b>C<sub>15</sub>H<sub>14</sub>N<sub>3</sub>SCl</b><br/>           Calculated monoisotopic mass: 303.0597<br/>           Measured monoisotopic mass: 303.0601<br/>           Mass error: 1.31 ppm</p>              |  |

|            |                                                                                                   |                                                                                                                                                                                                                |                                                                                                                                                                                                 |
|------------|---------------------------------------------------------------------------------------------------|----------------------------------------------------------------------------------------------------------------------------------------------------------------------------------------------------------------|-------------------------------------------------------------------------------------------------------------------------------------------------------------------------------------------------|
| <p>T12</p> | 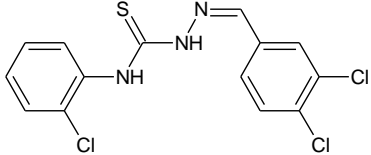 <p>M=358,67</p> | <p>C<sub>14</sub>H<sub>10</sub>N<sub>3</sub>SCl<sub>3</sub><br/>           Calculated monoisotopic mass: 356.9661<br/>           Measured monoisotopic mass: 356.9654<br/>           Mass error: -1.83 ppm</p> | <p>Theoretical monoisotopic mass of [M+H]<sup>+</sup>: 357.9734</p>  <p>Counts vs. Mass-to-Charge (m/z)</p>  |
| <p>T13</p> |  <p>M=368,68</p> | <p>C<sub>14</sub>H<sub>11</sub>N<sub>3</sub>SClBr<br/>           Calculated monoisotopic mass: 366.9546<br/>           Measured monoisotopic mass: 366.9551<br/>           Mass error: 1.46 ppm</p>            | <p>Theoretical monoisotopic mass of [M+H]<sup>+</sup>: 367.9618</p>  <p>Counts vs. Mass-to-Charge (m/z)</p> |

T17

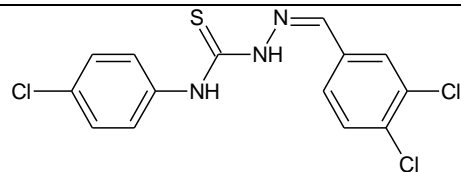

M=358,67

C<sub>14</sub>H<sub>10</sub>N<sub>3</sub>SCl<sub>3</sub>

Calculated monoisotopic mass: 356.9661

Measured monoisotopic mass: 356.9664

Mass error: 0.96 ppm

Theoretical monoisotopic mass of [M+H]<sup>+</sup>: 357.9734

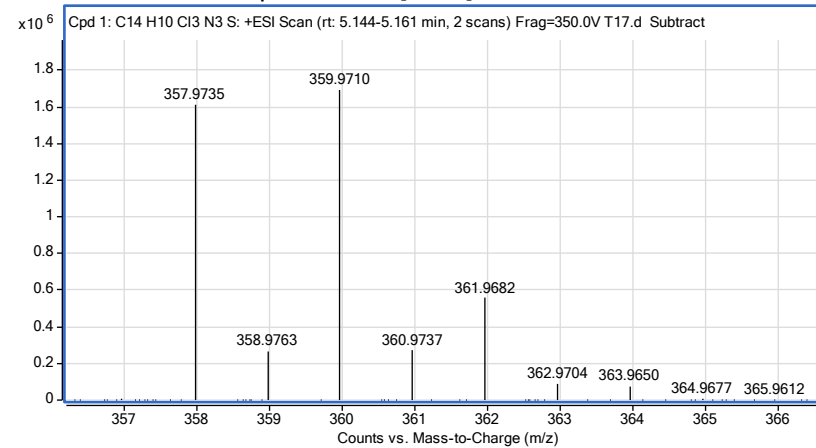

T1

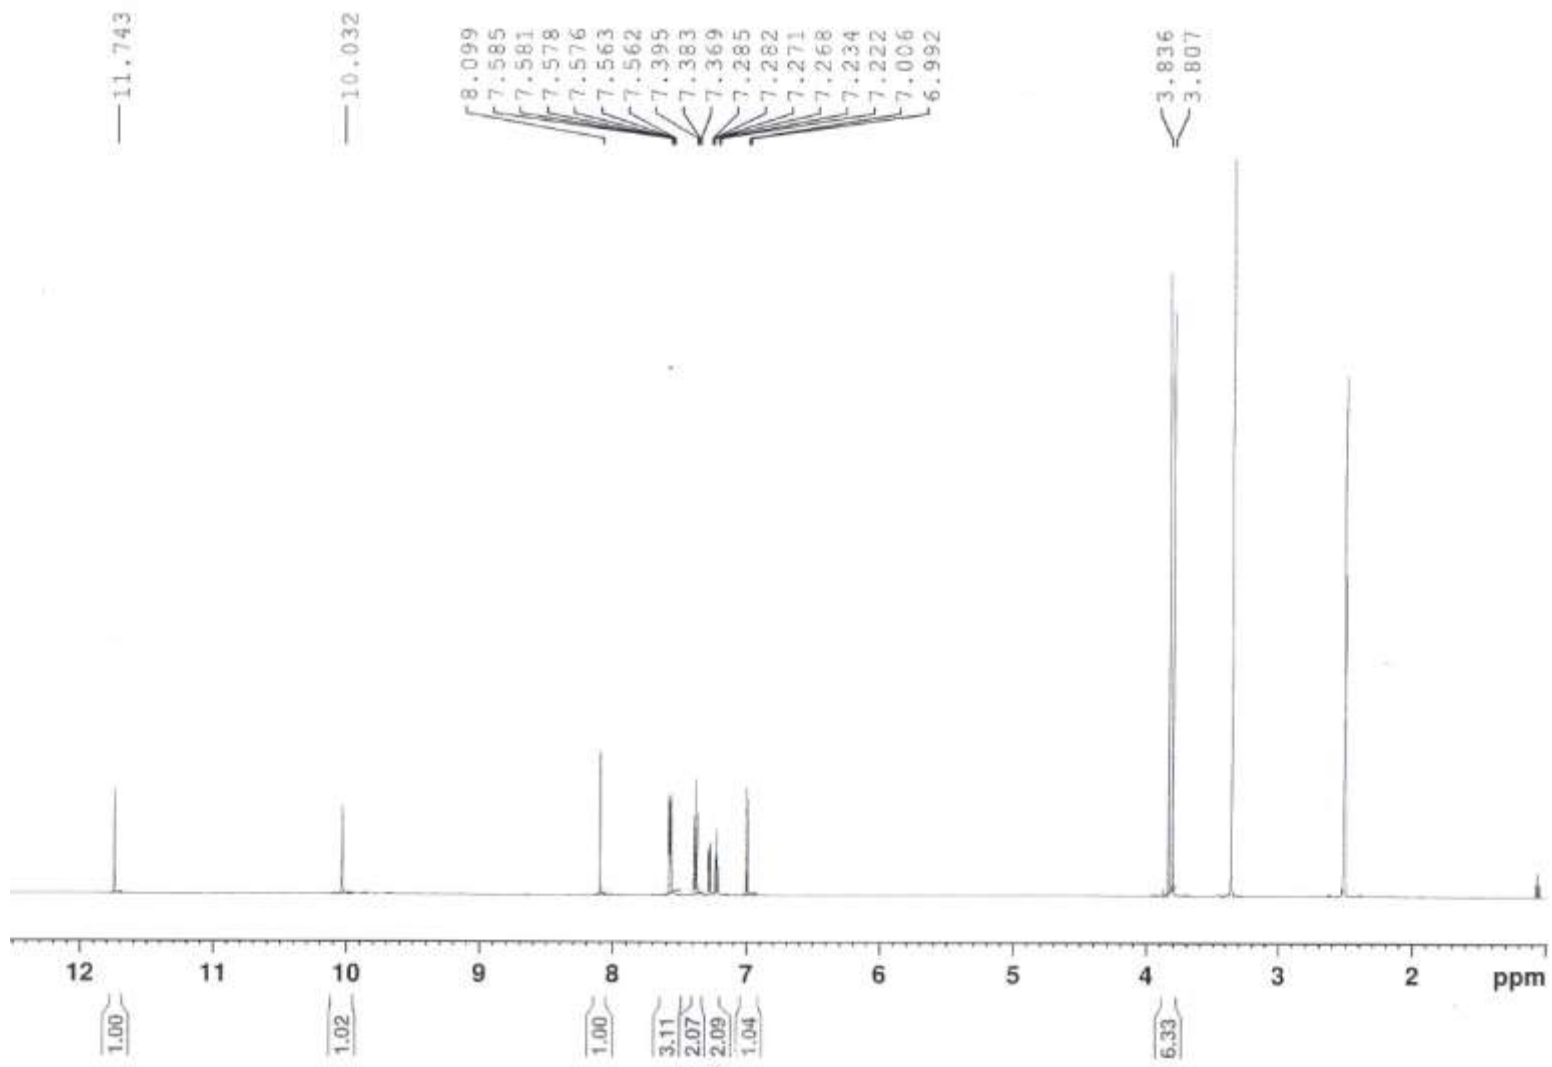



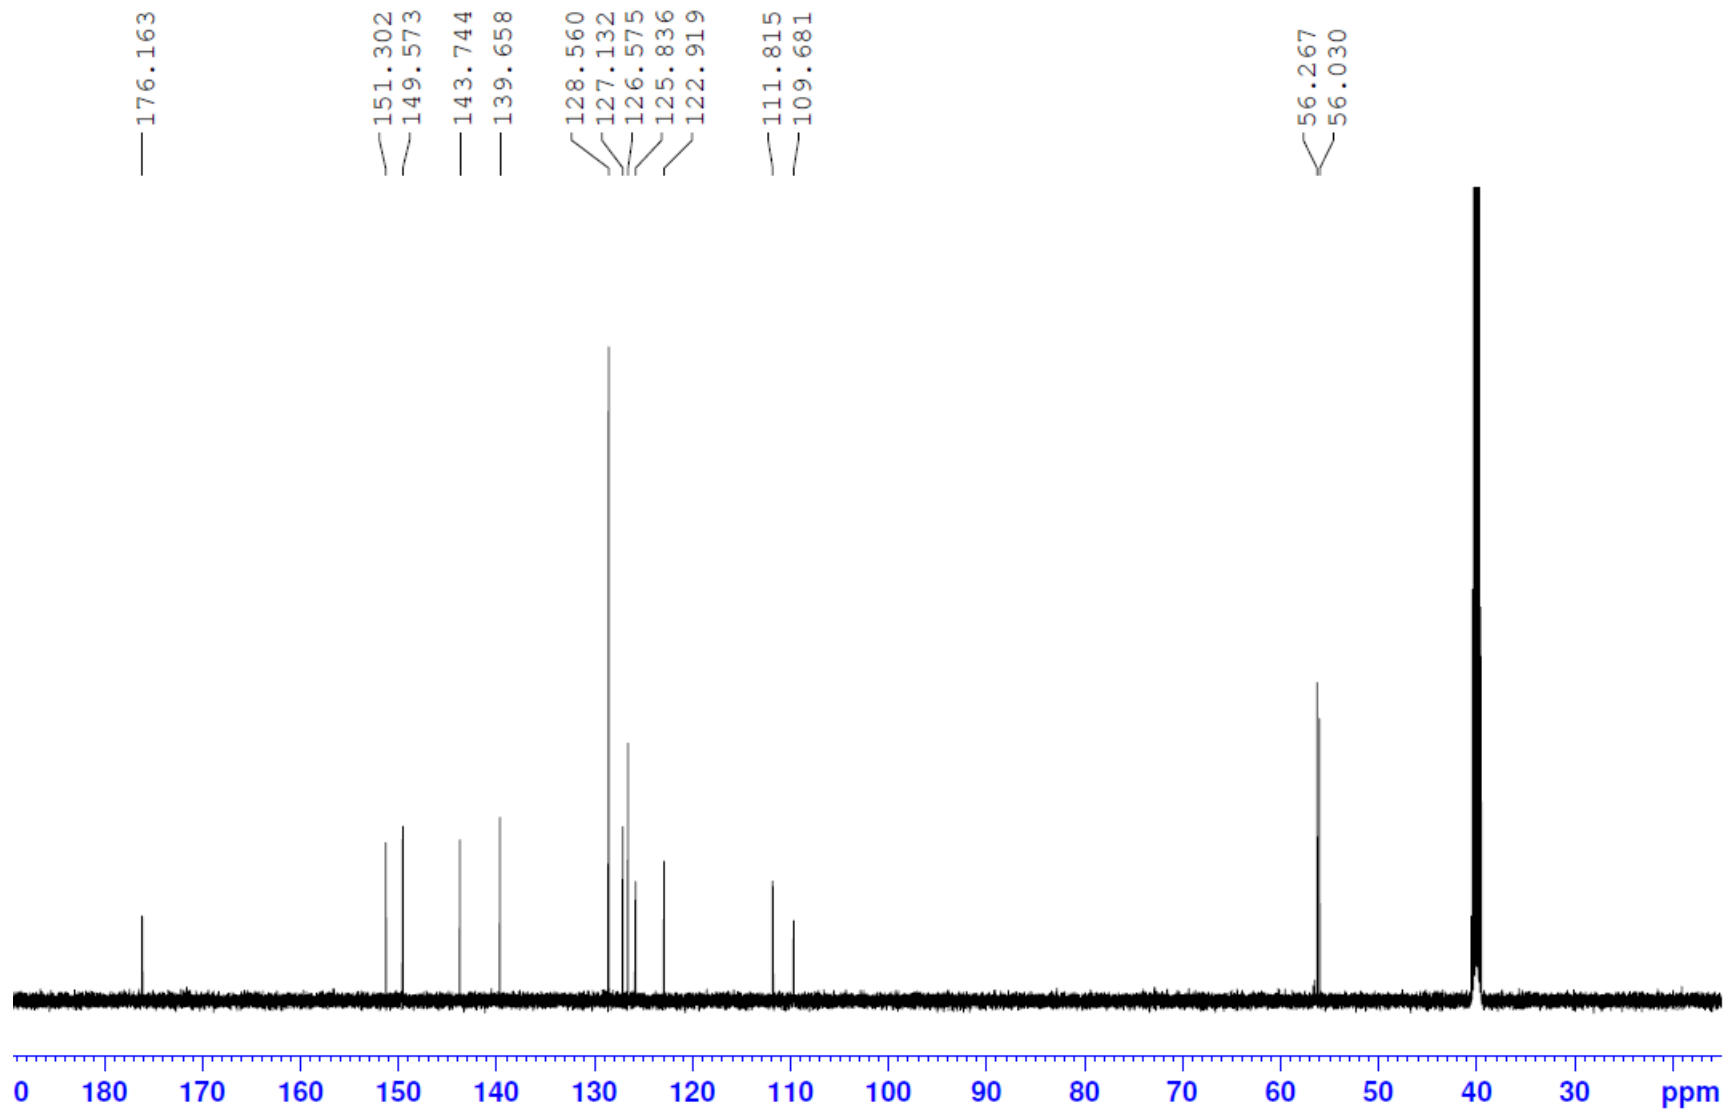

T2

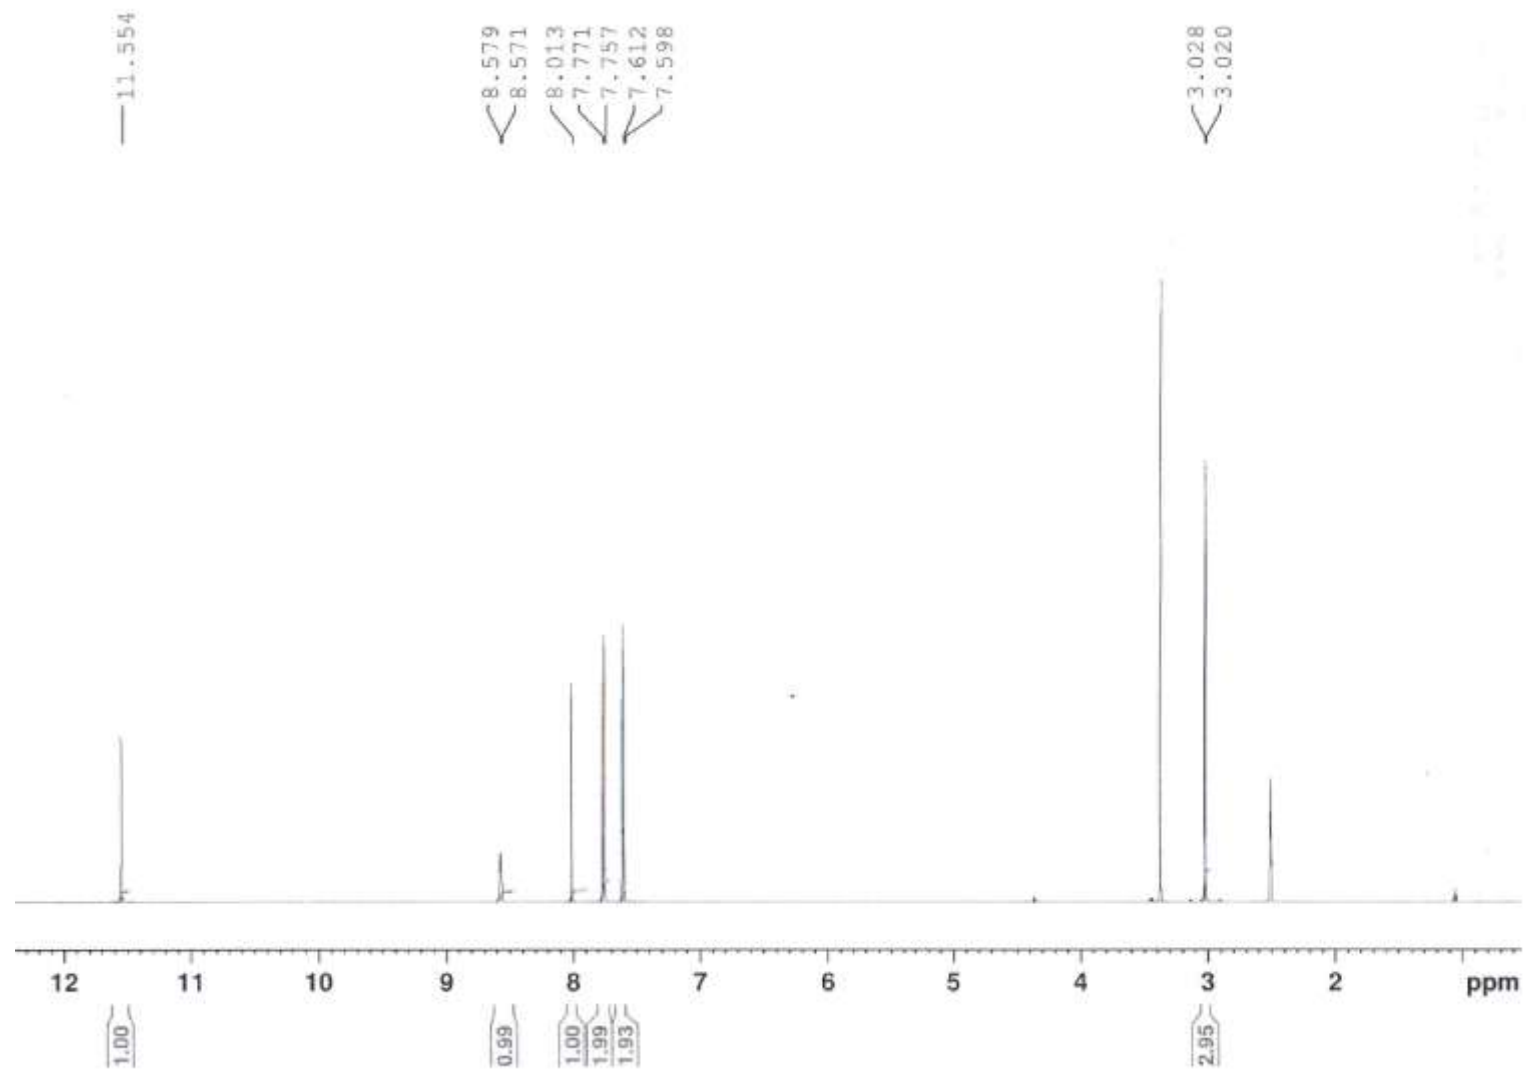

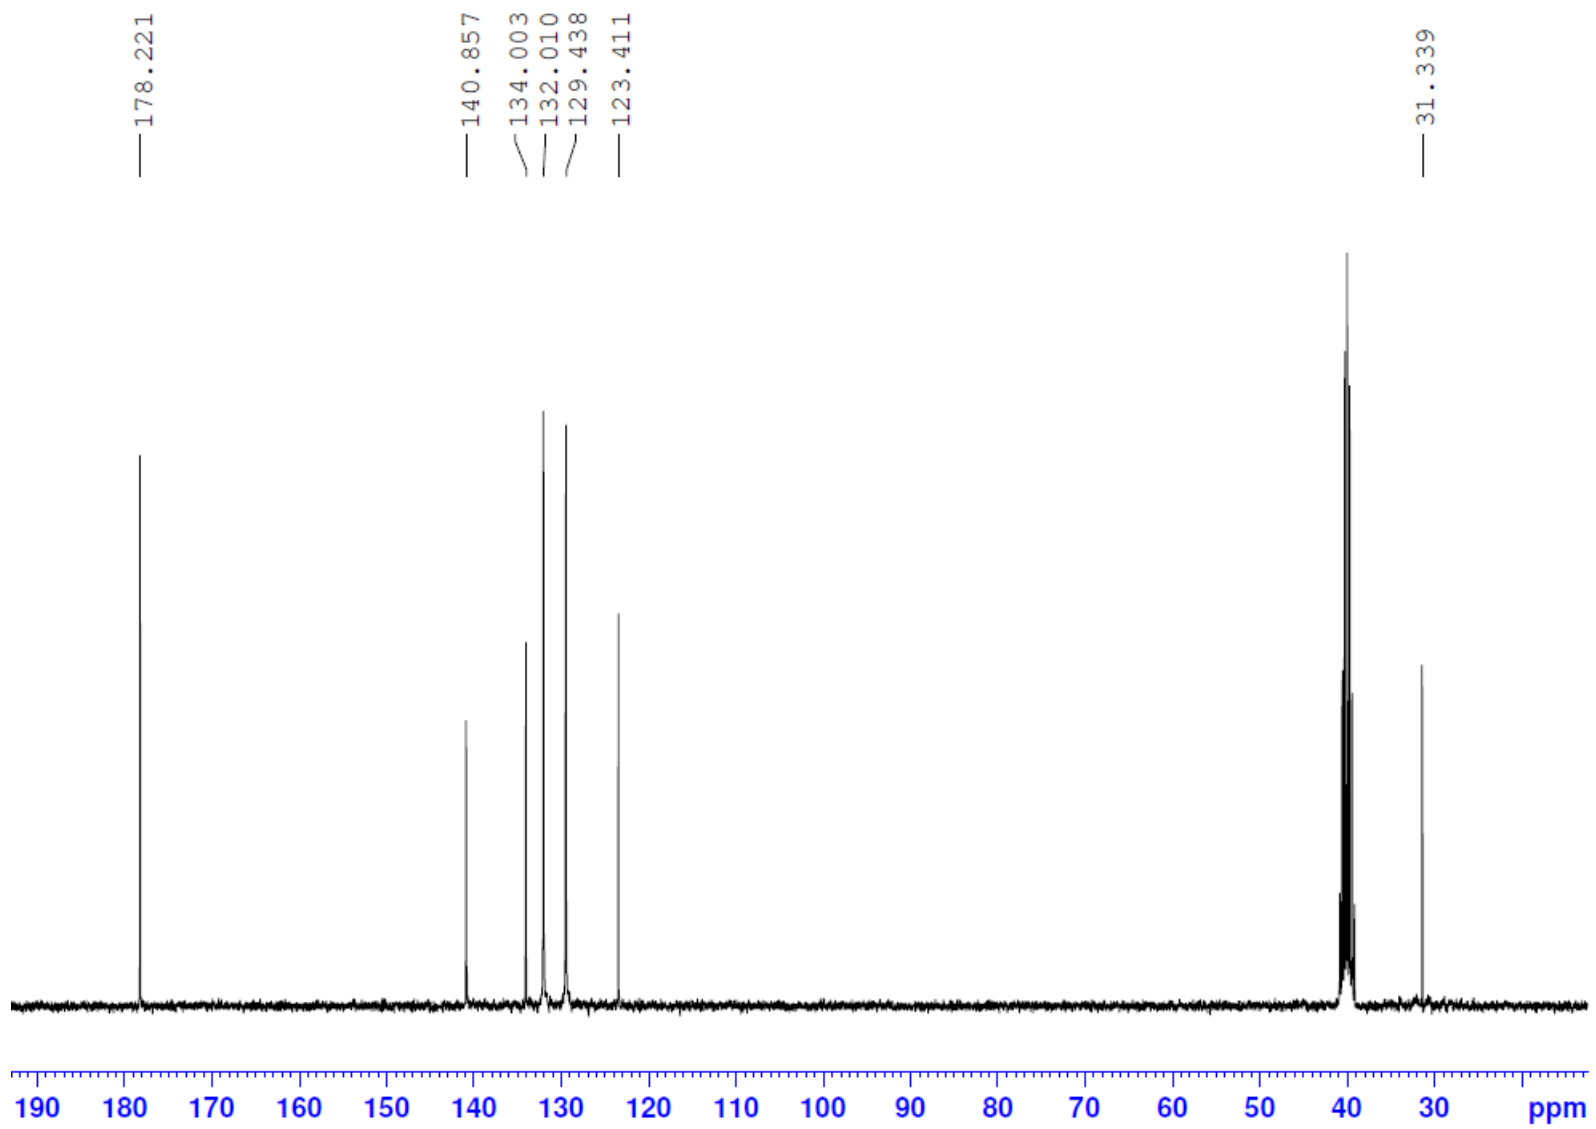

T3

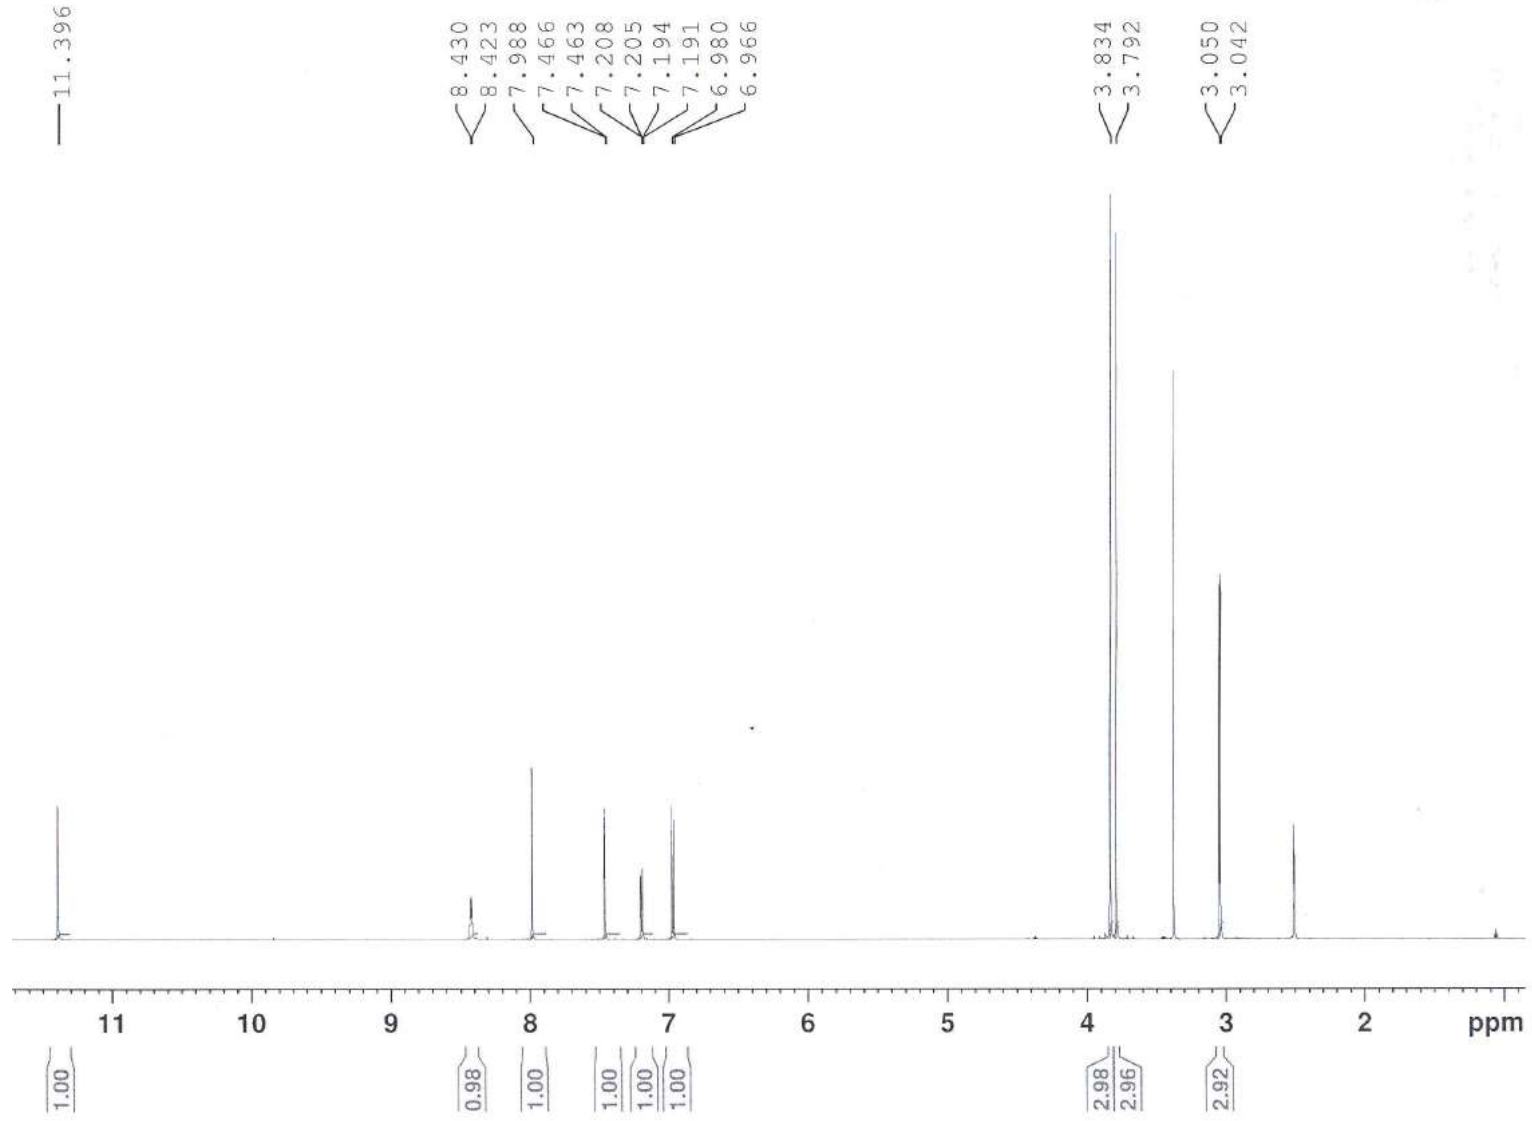

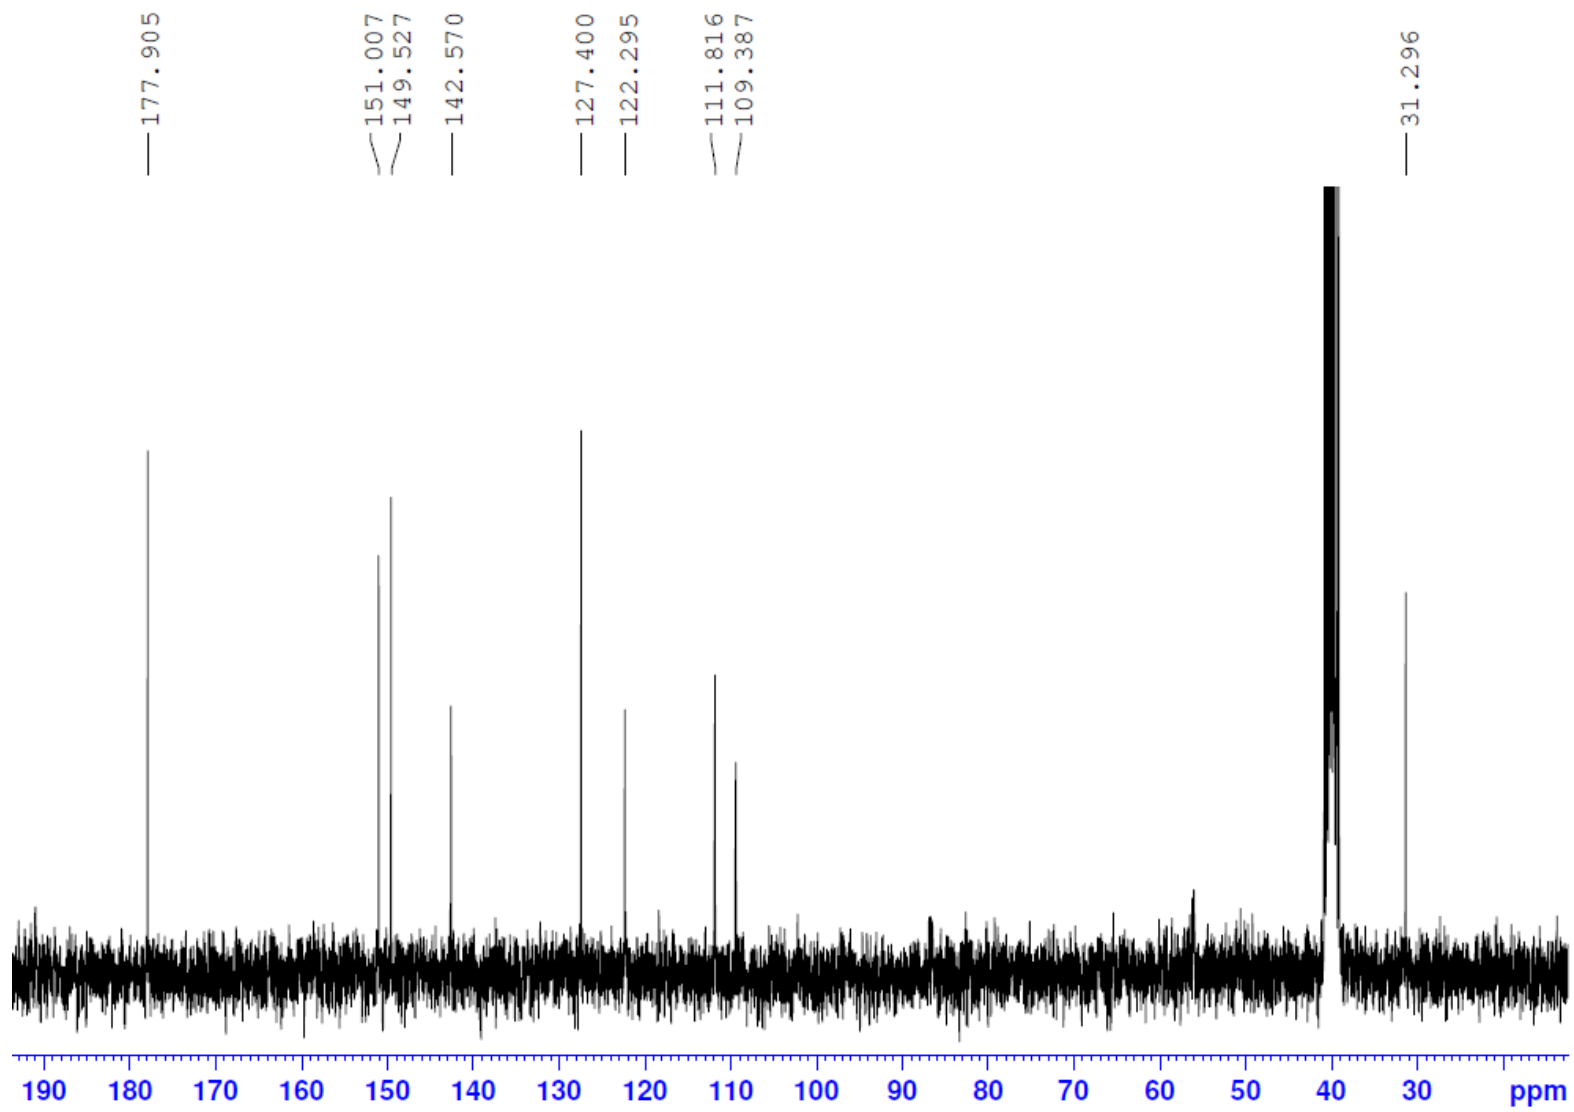

T4

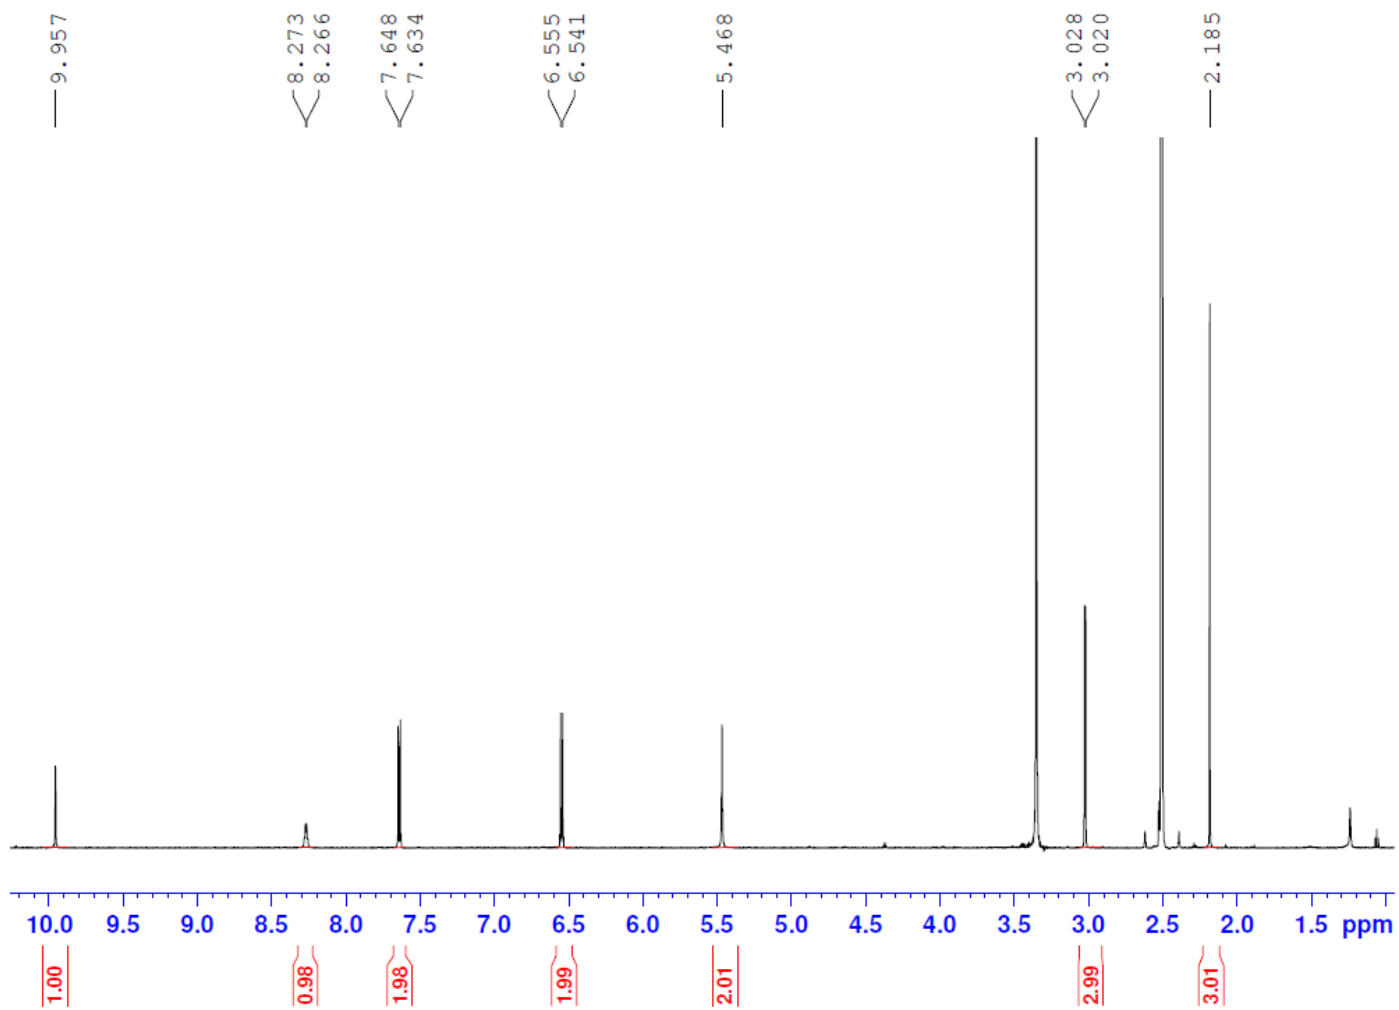

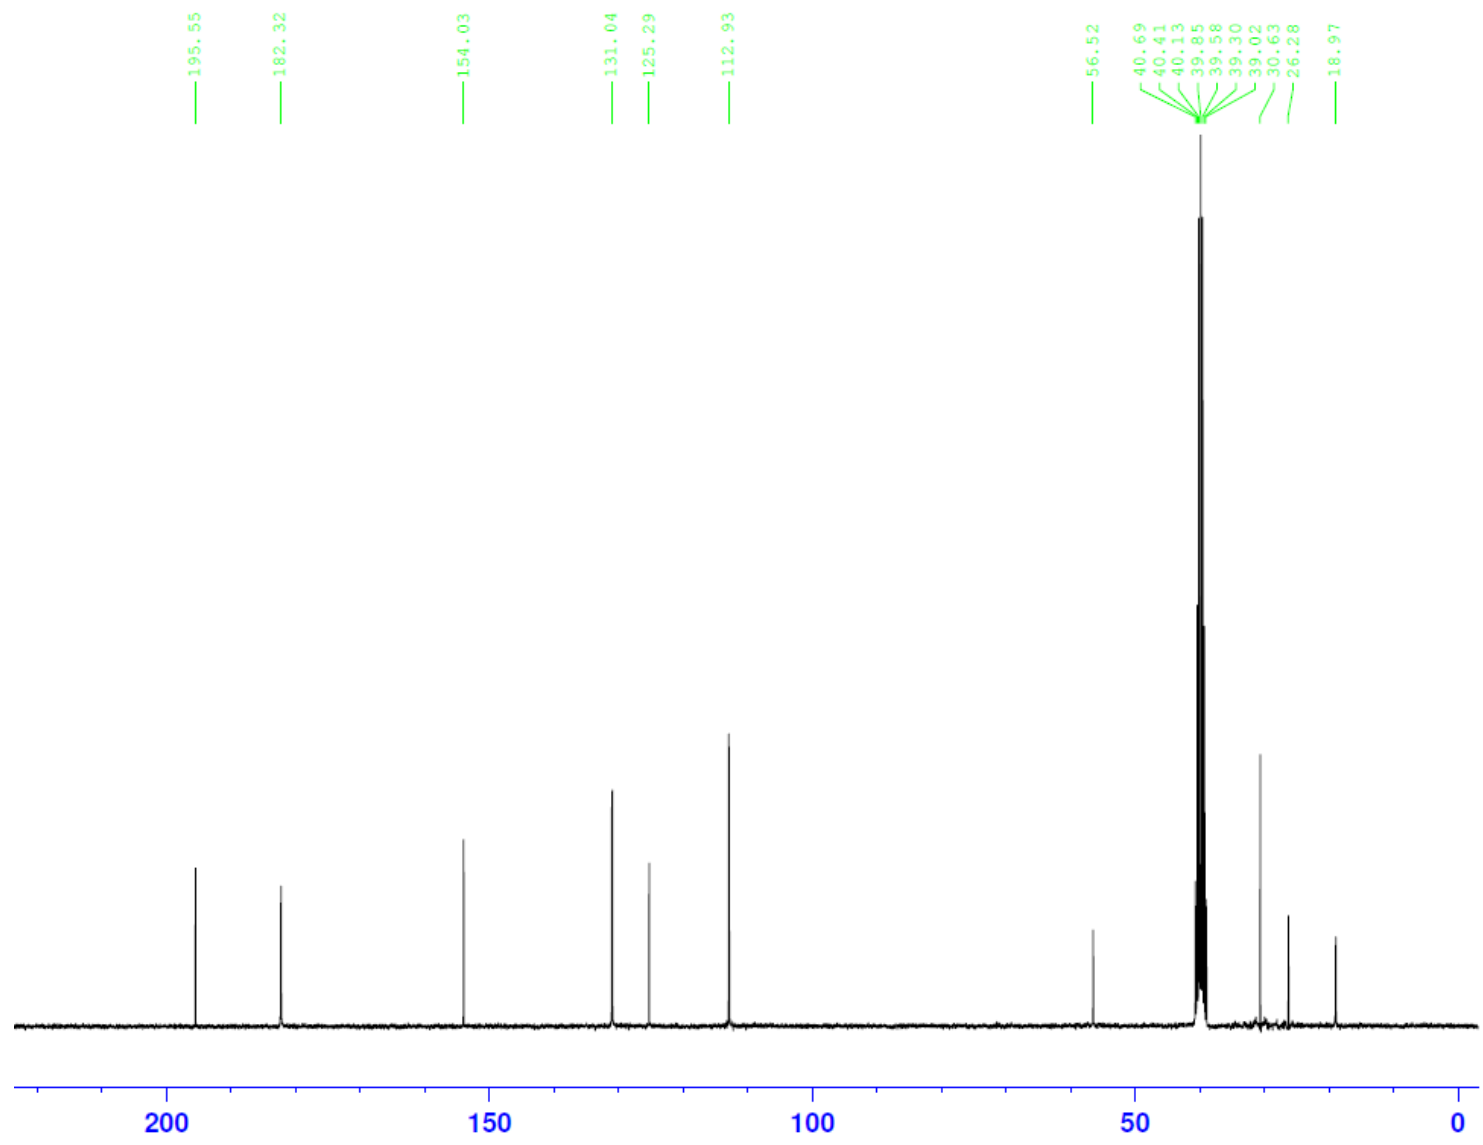

T5

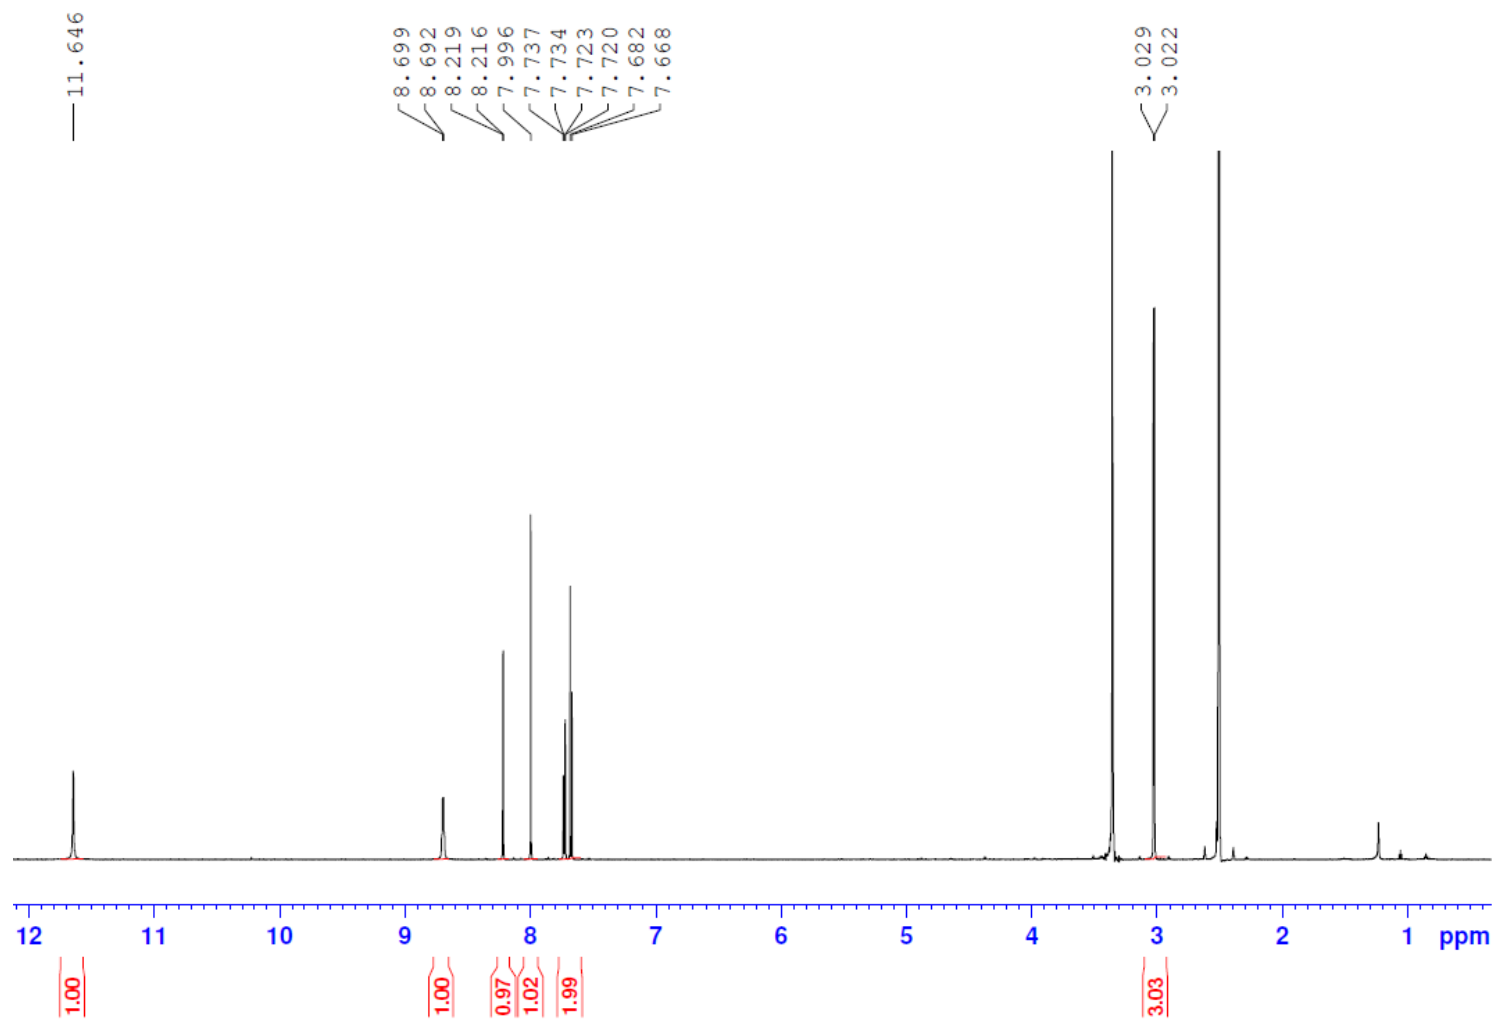



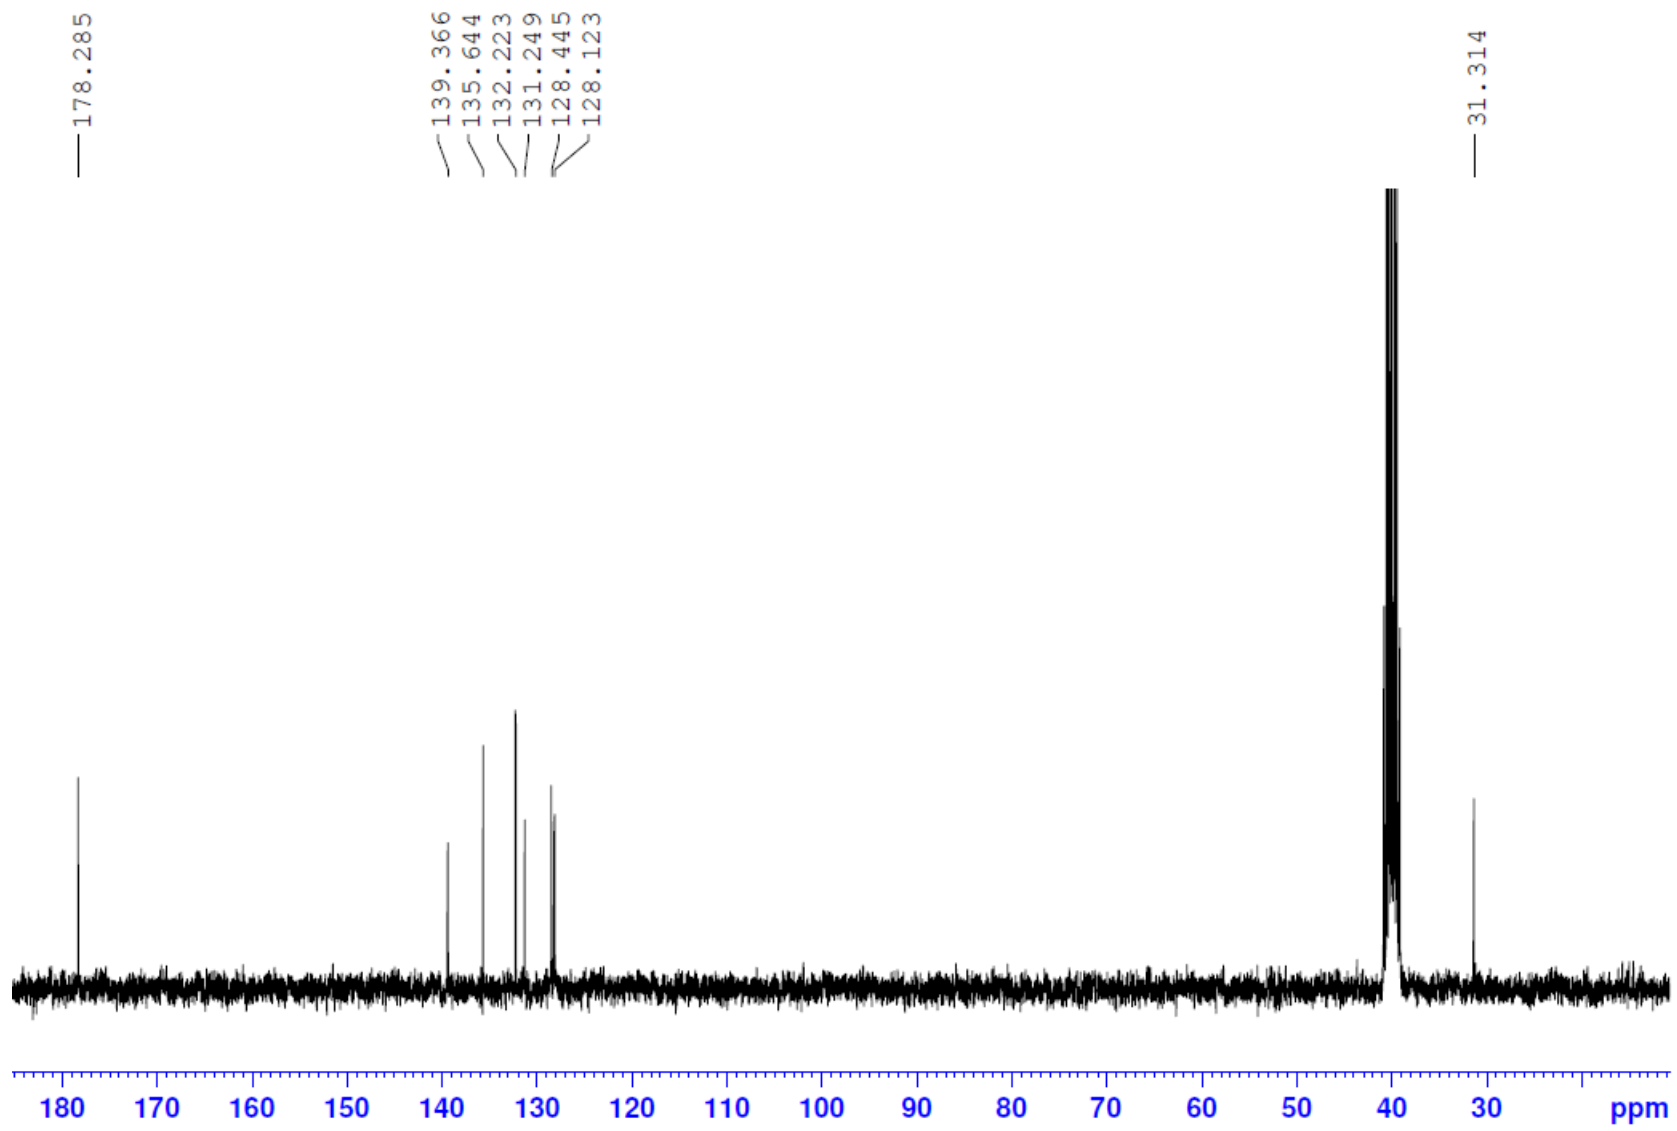

T6

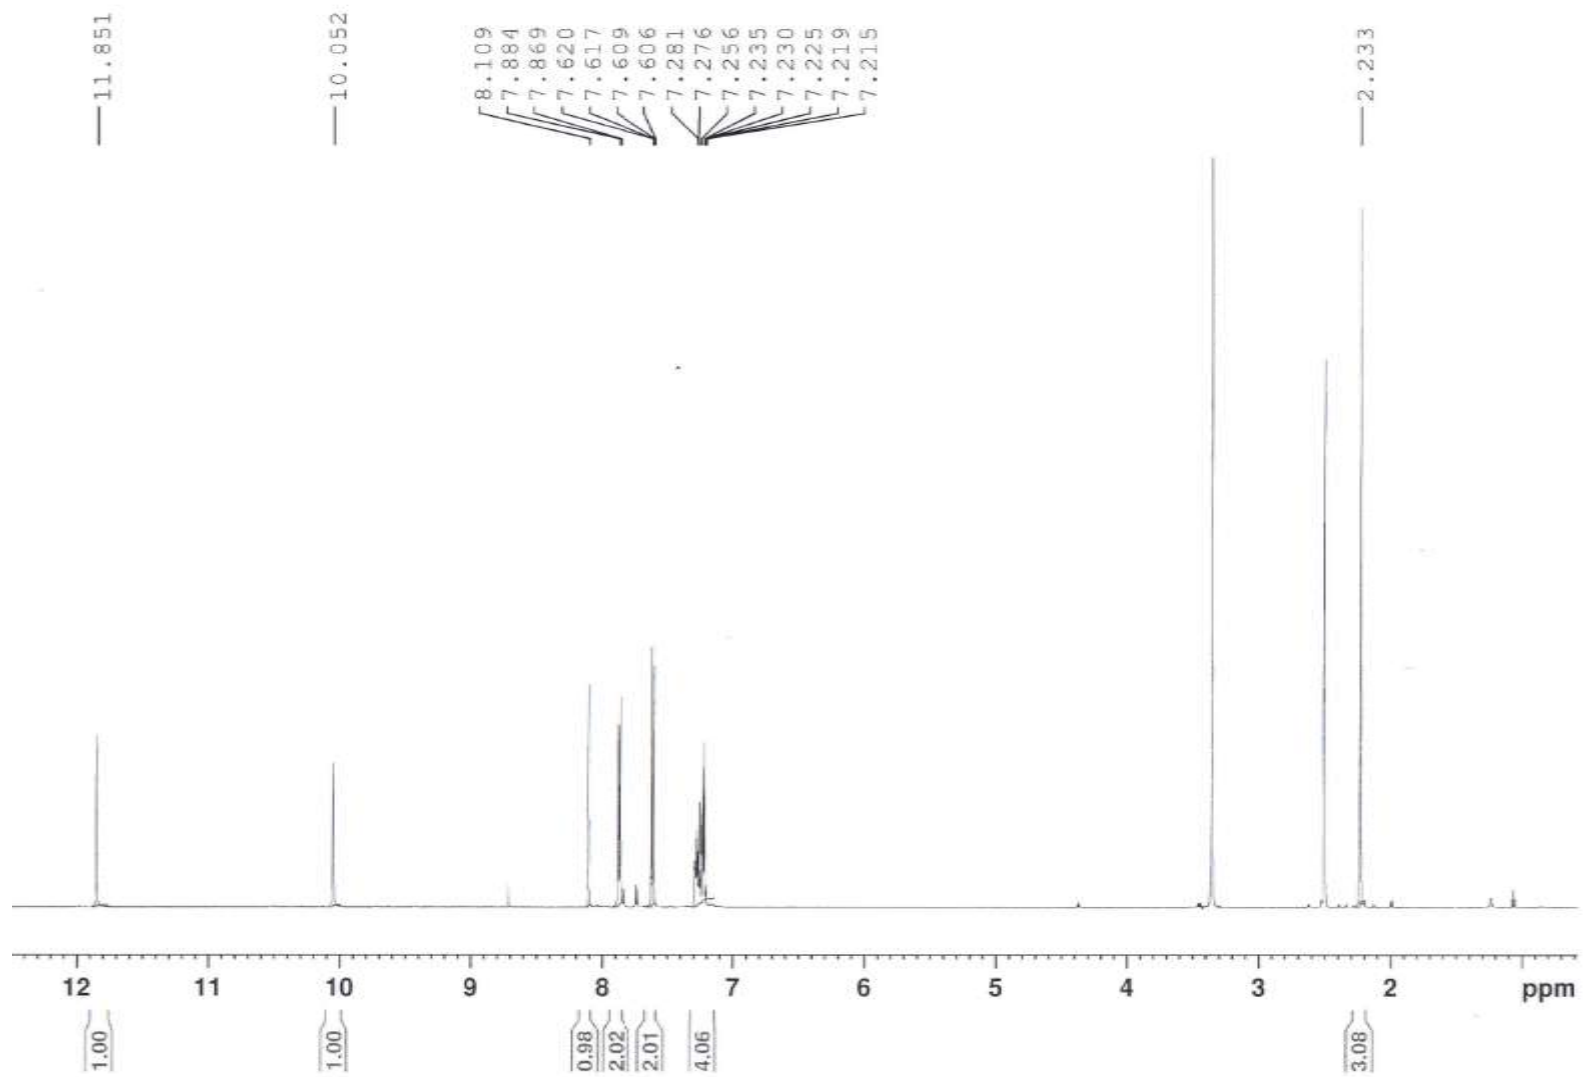

T7

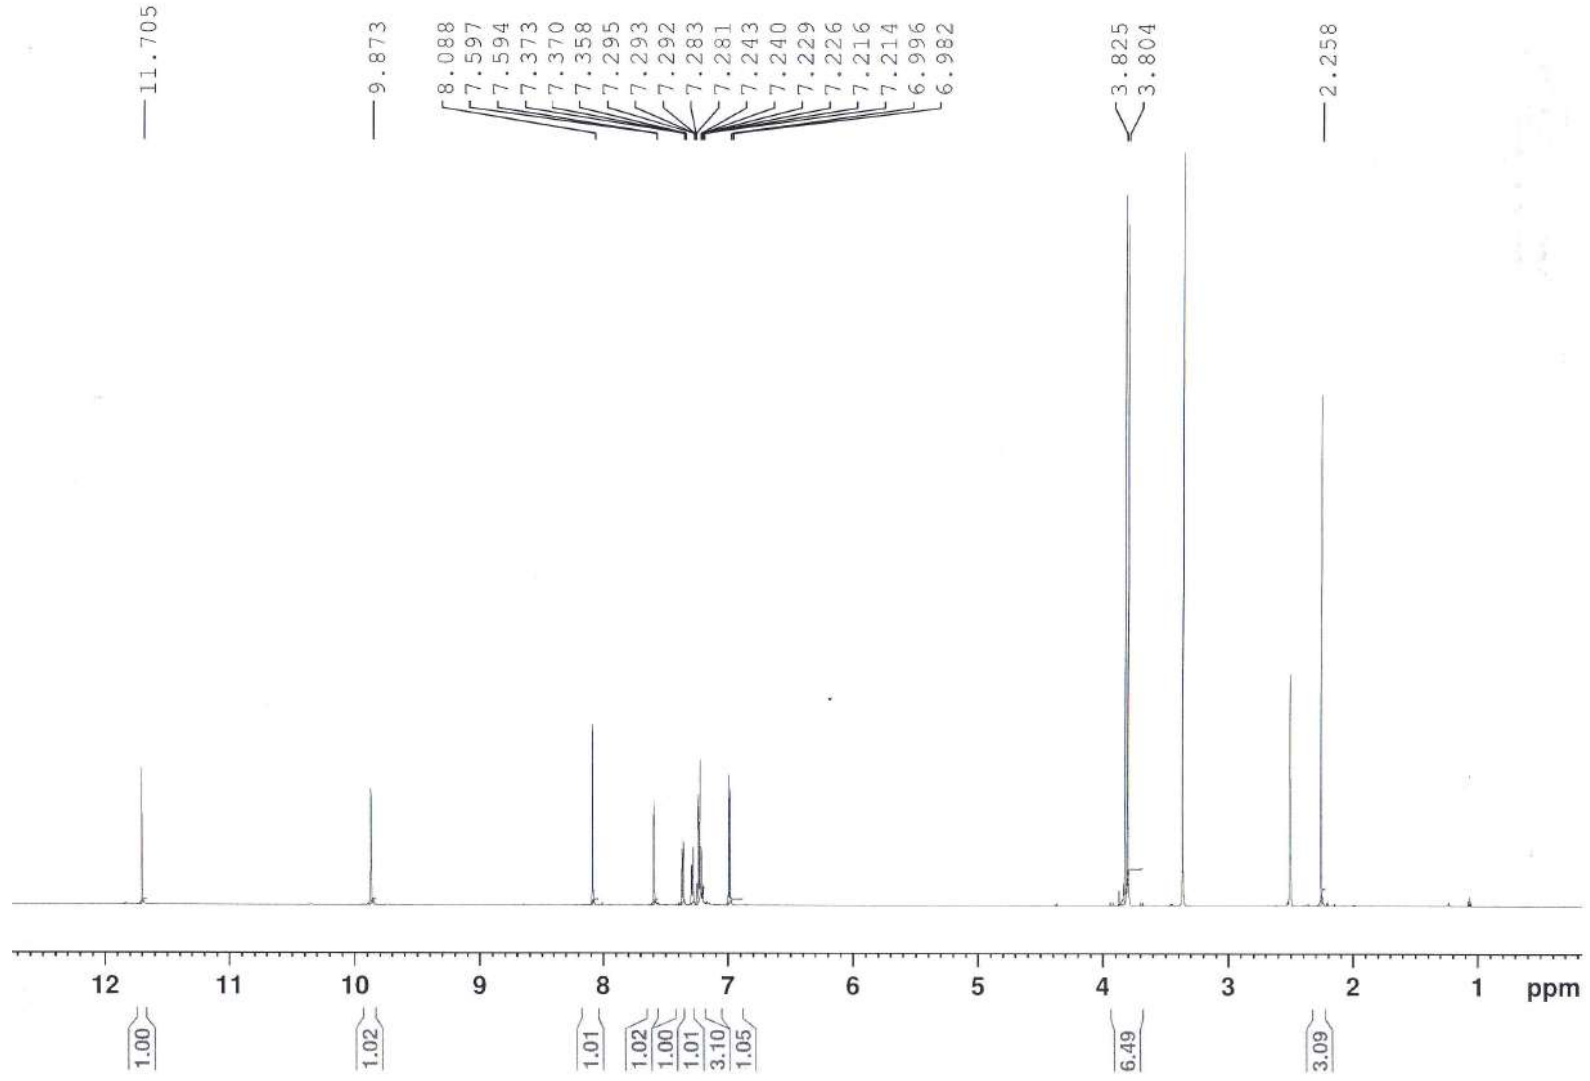

T8

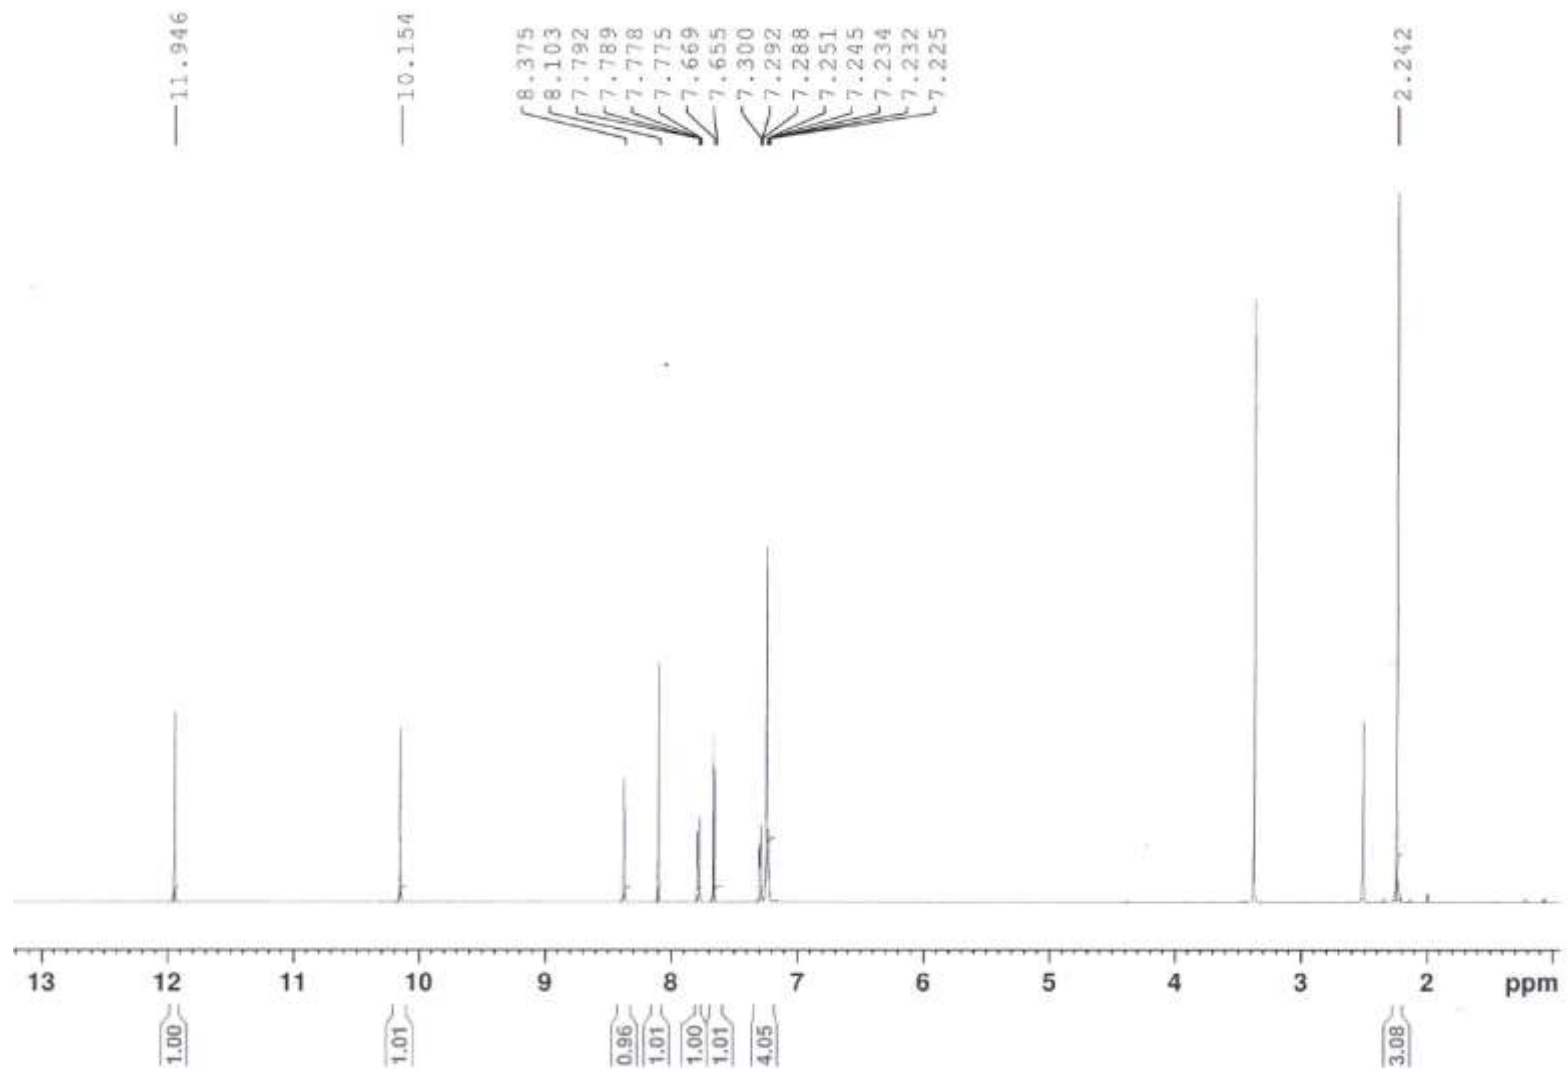

T9

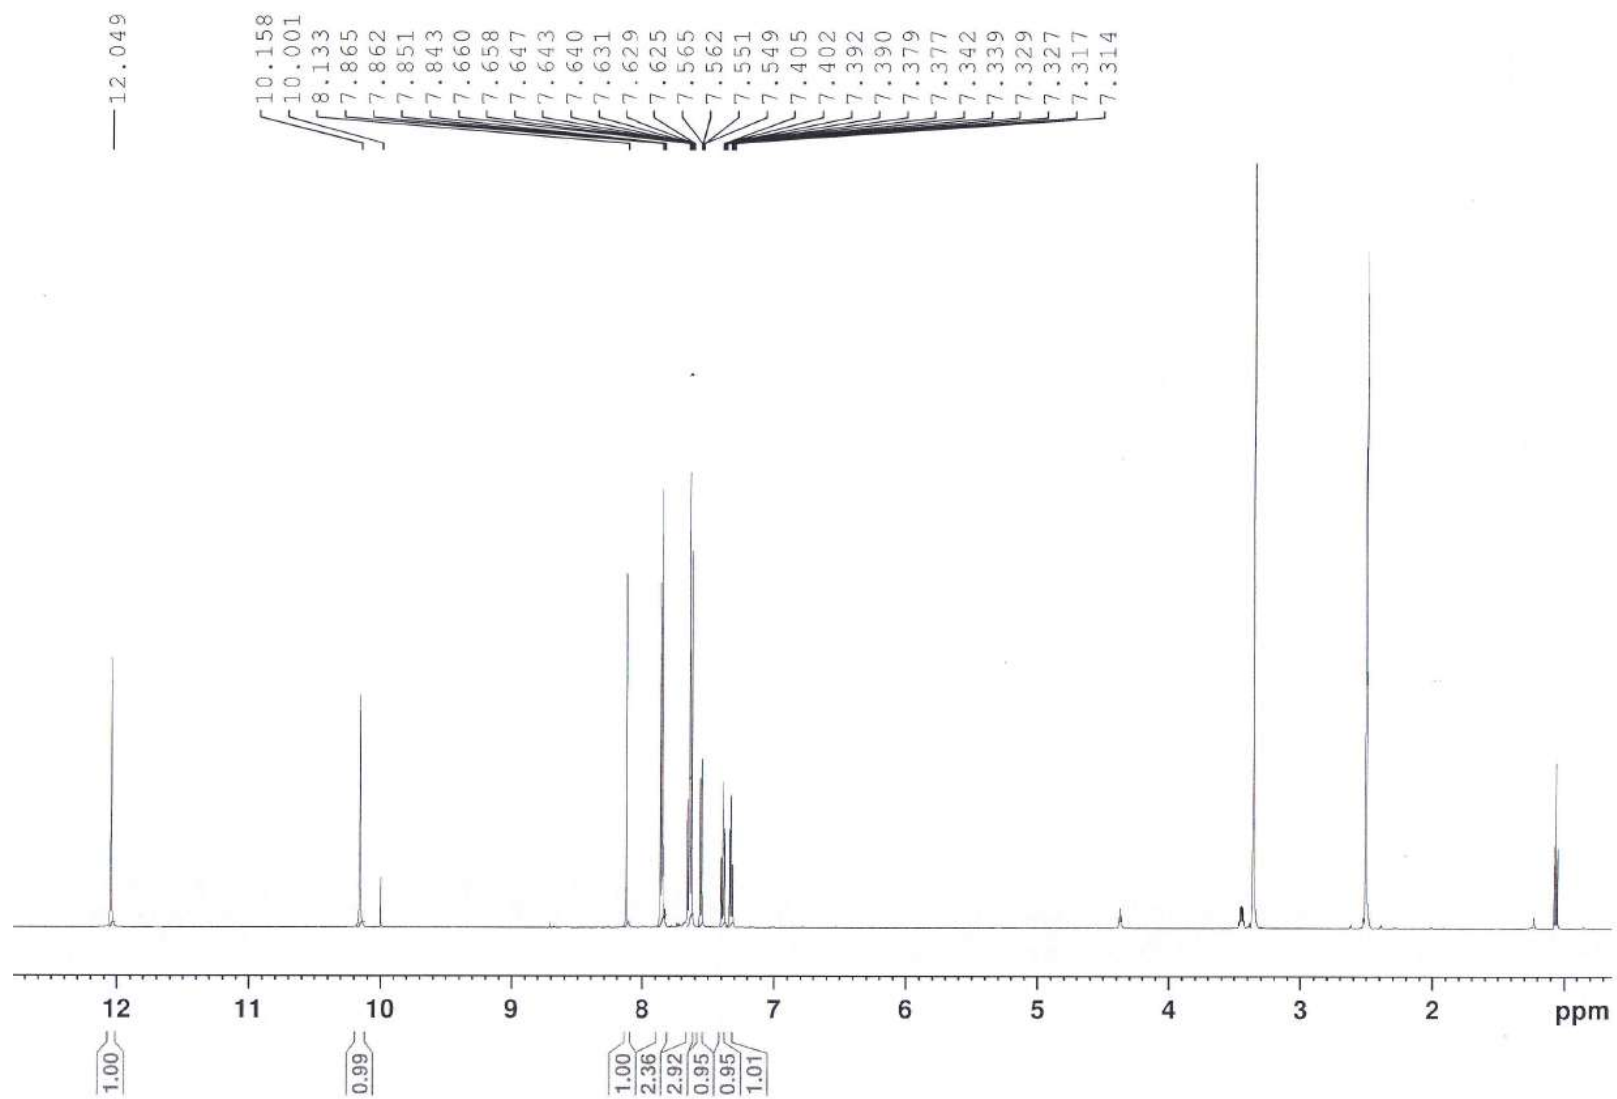

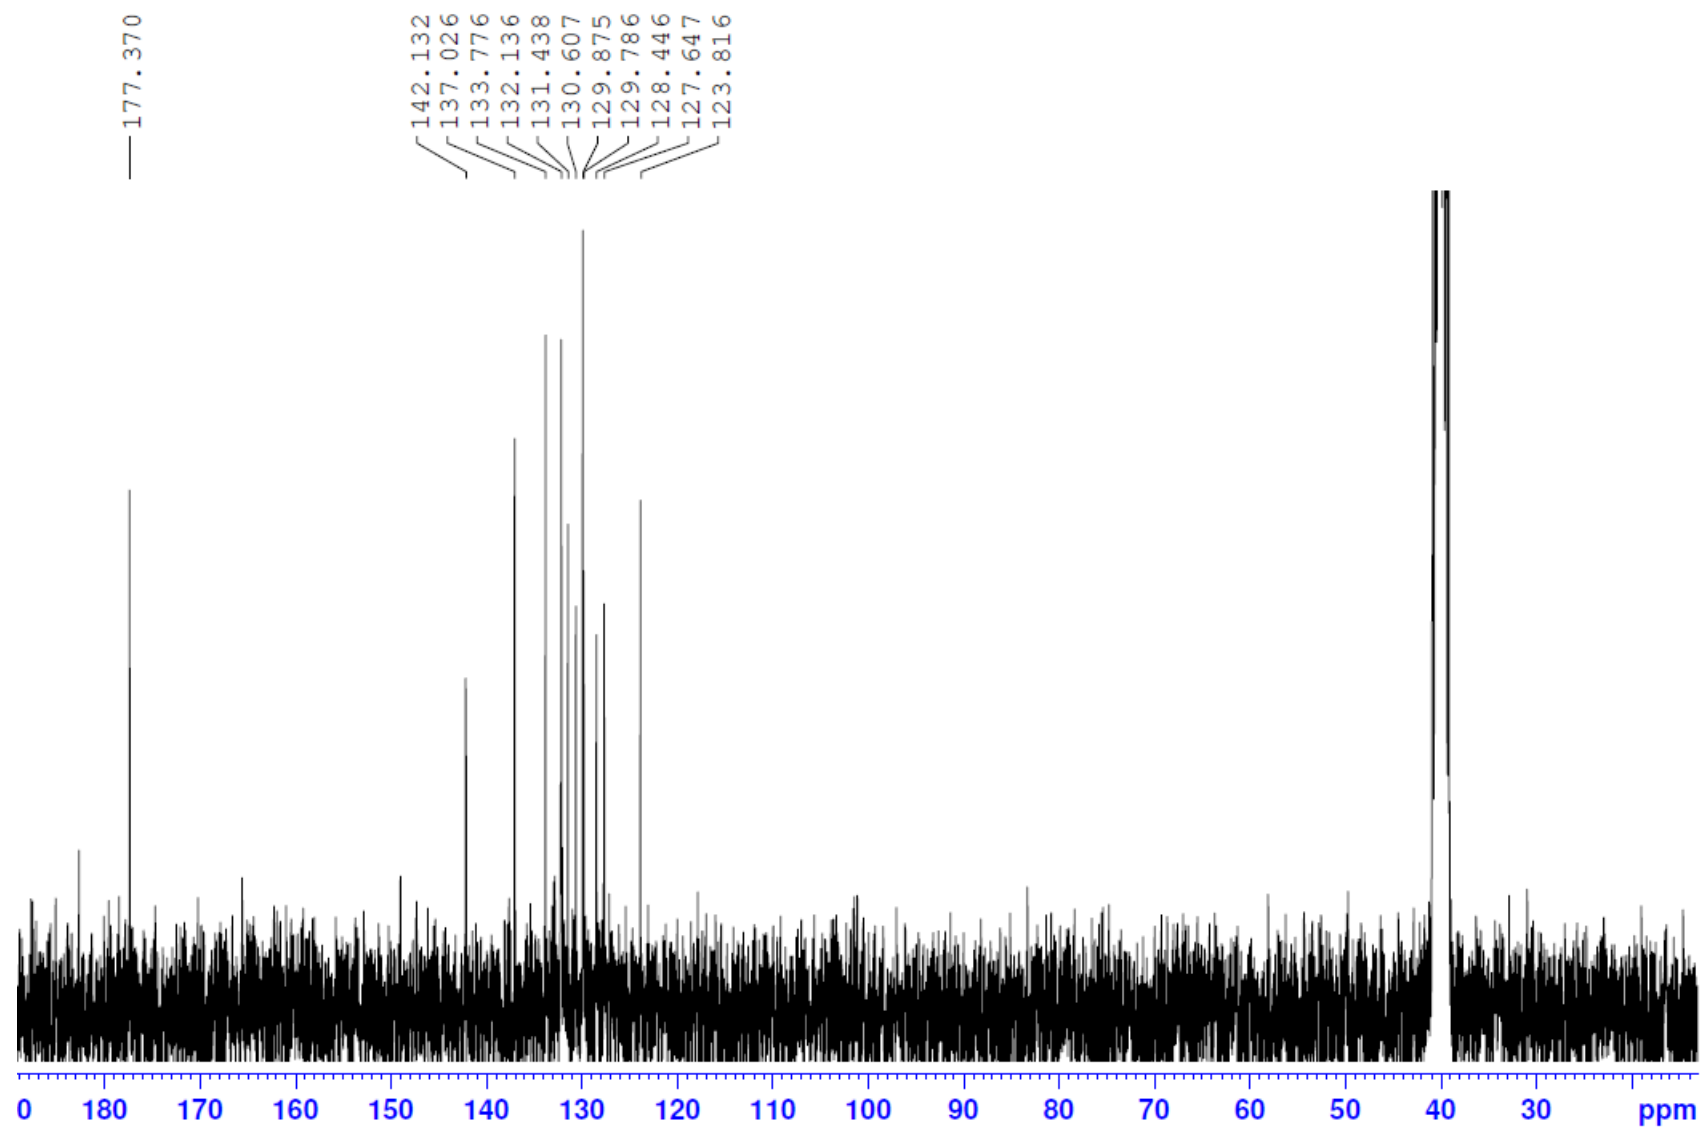

T10

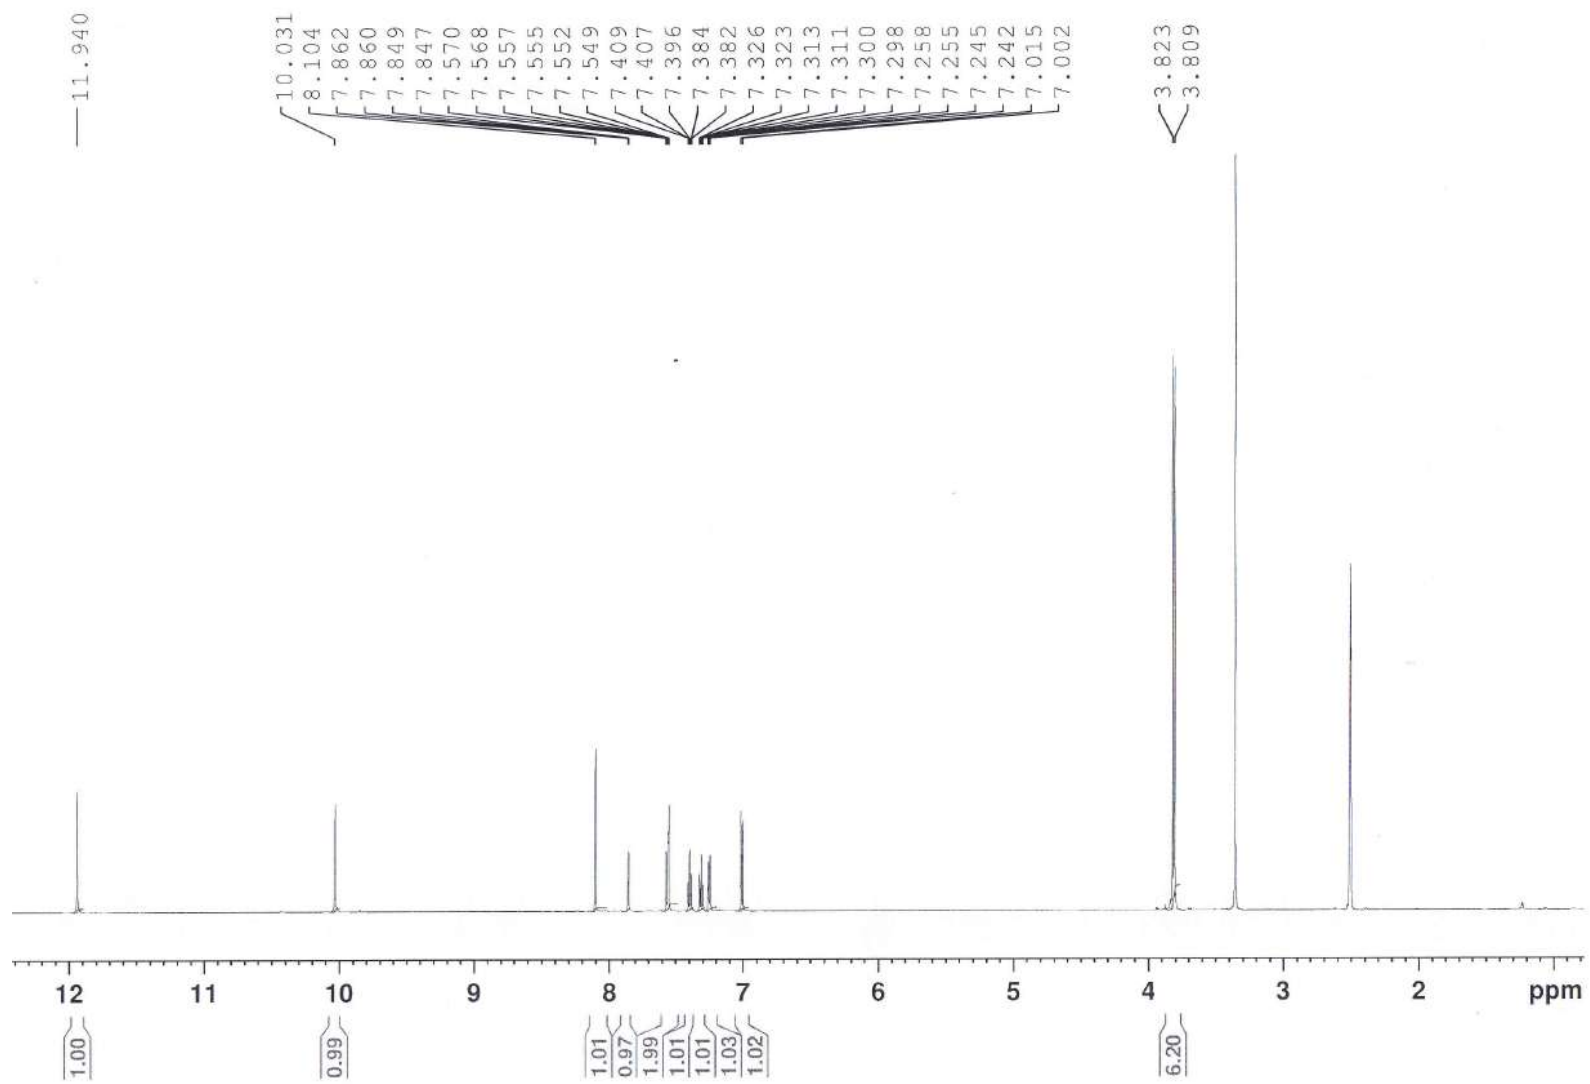

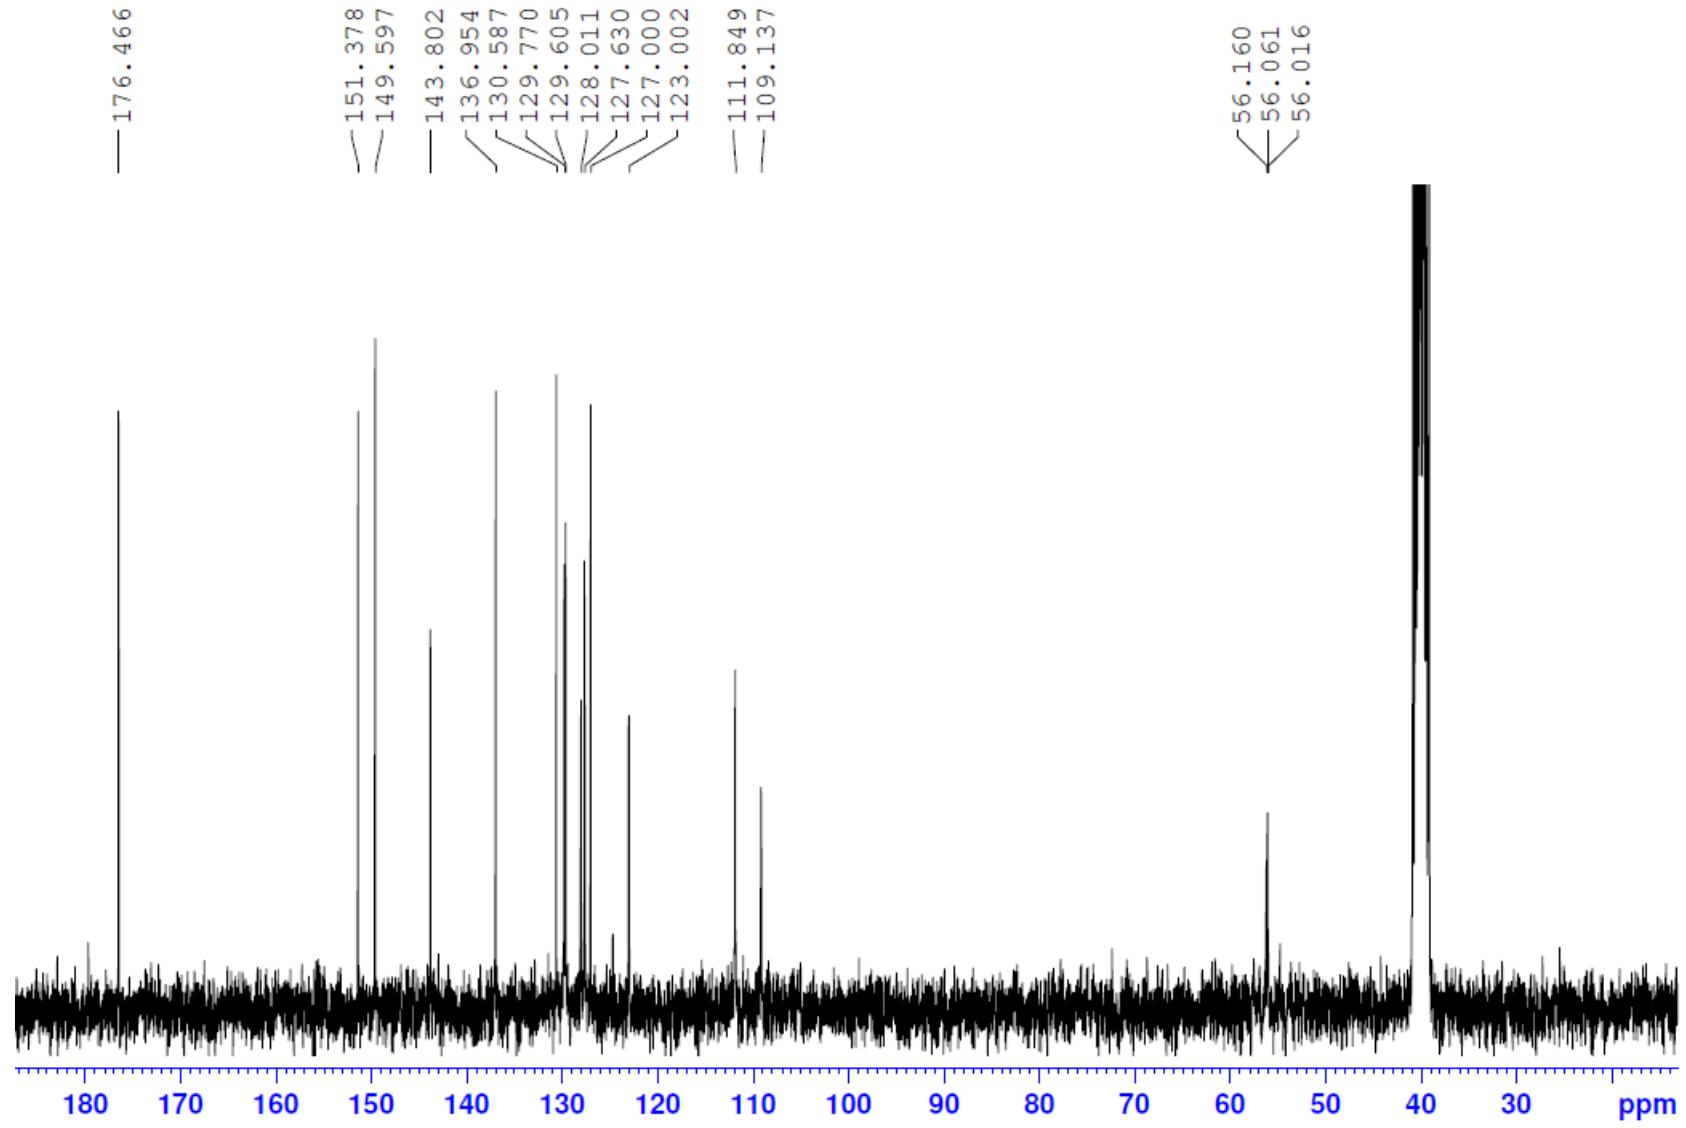



T11

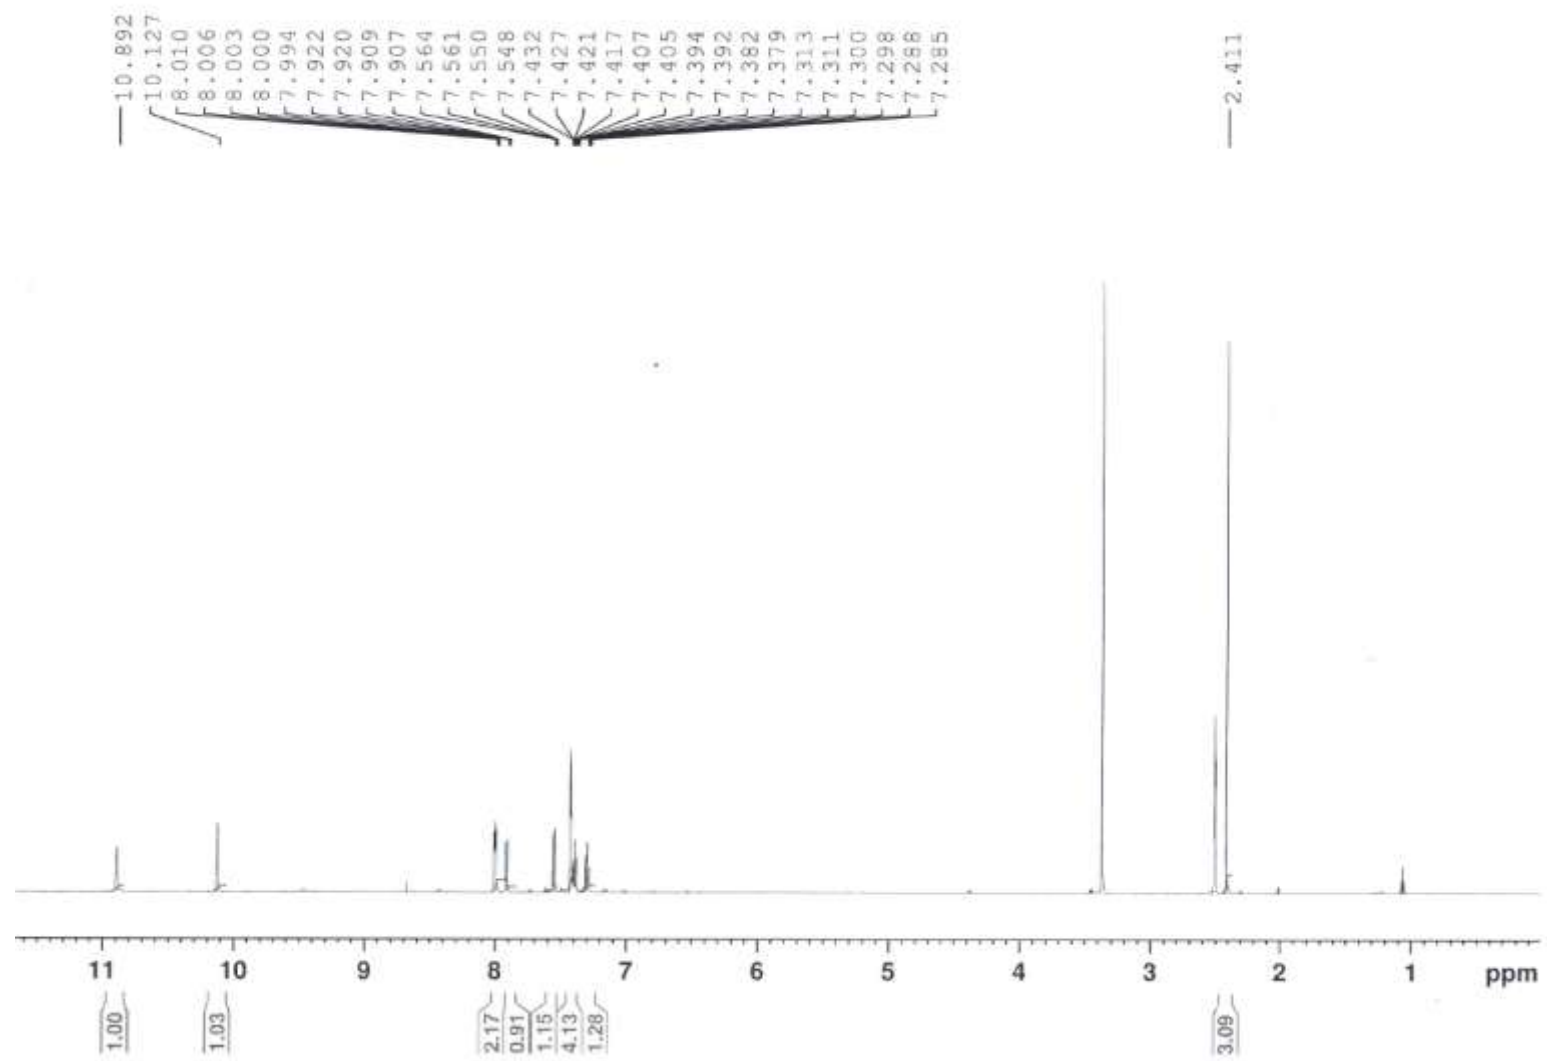

T12

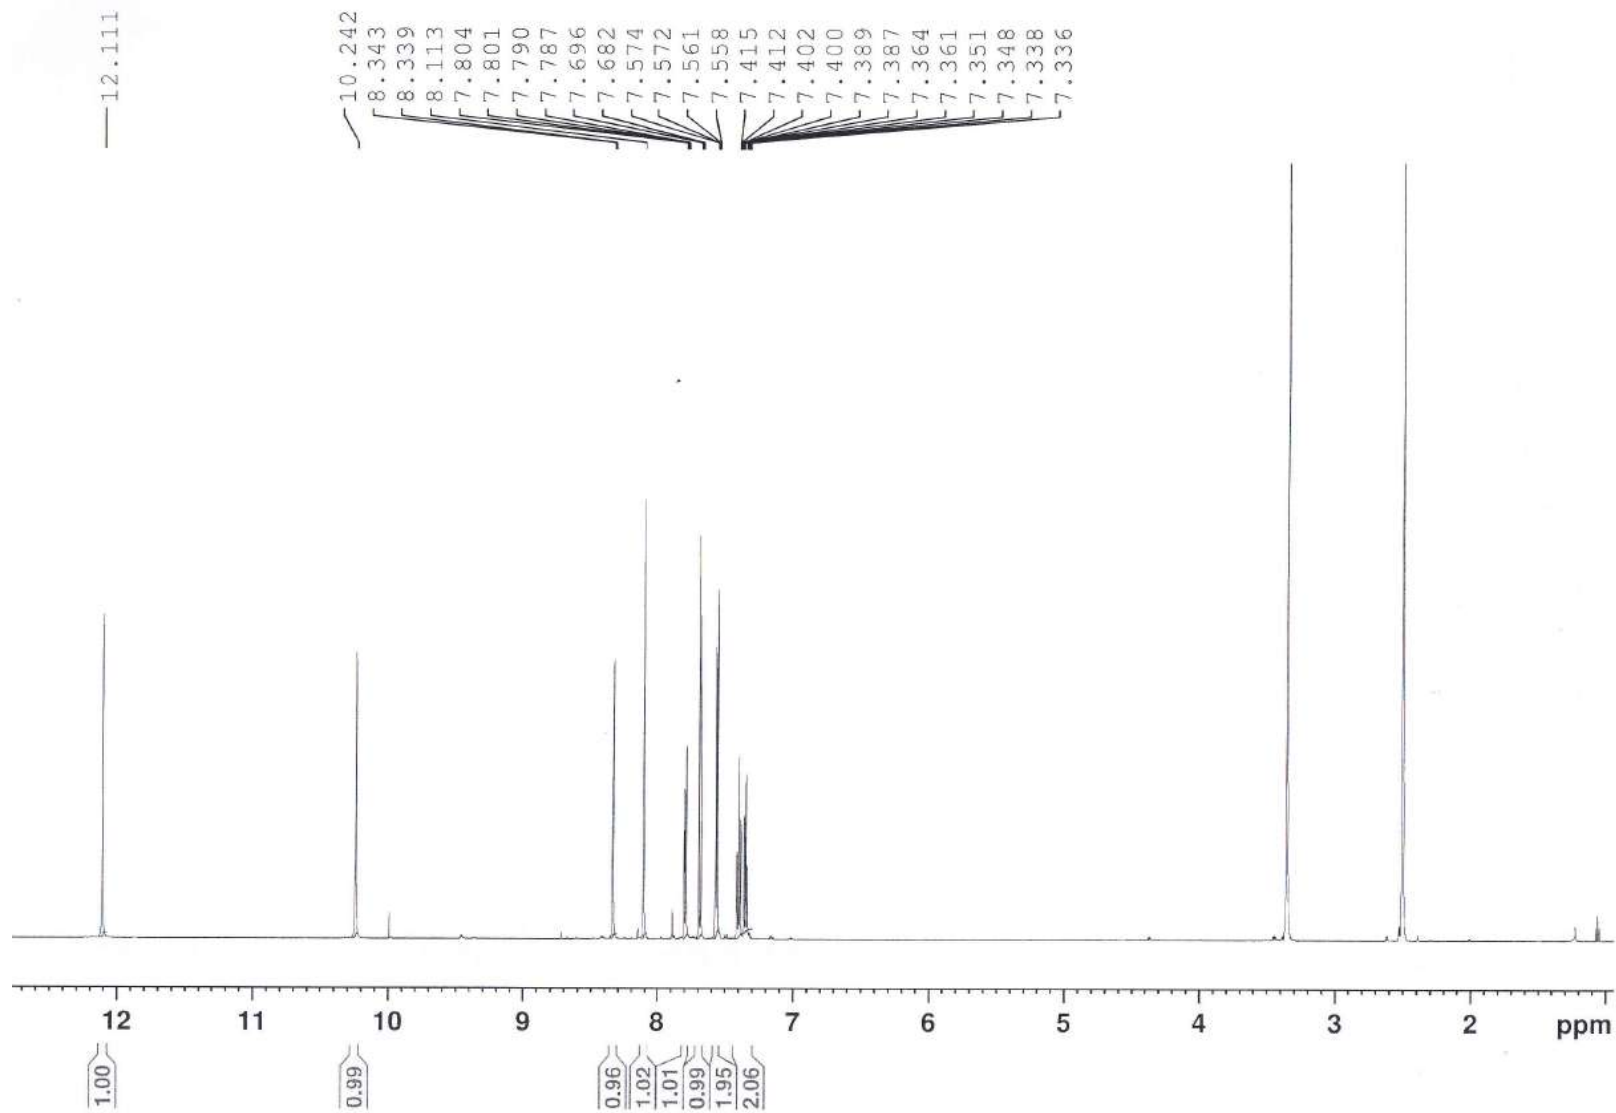

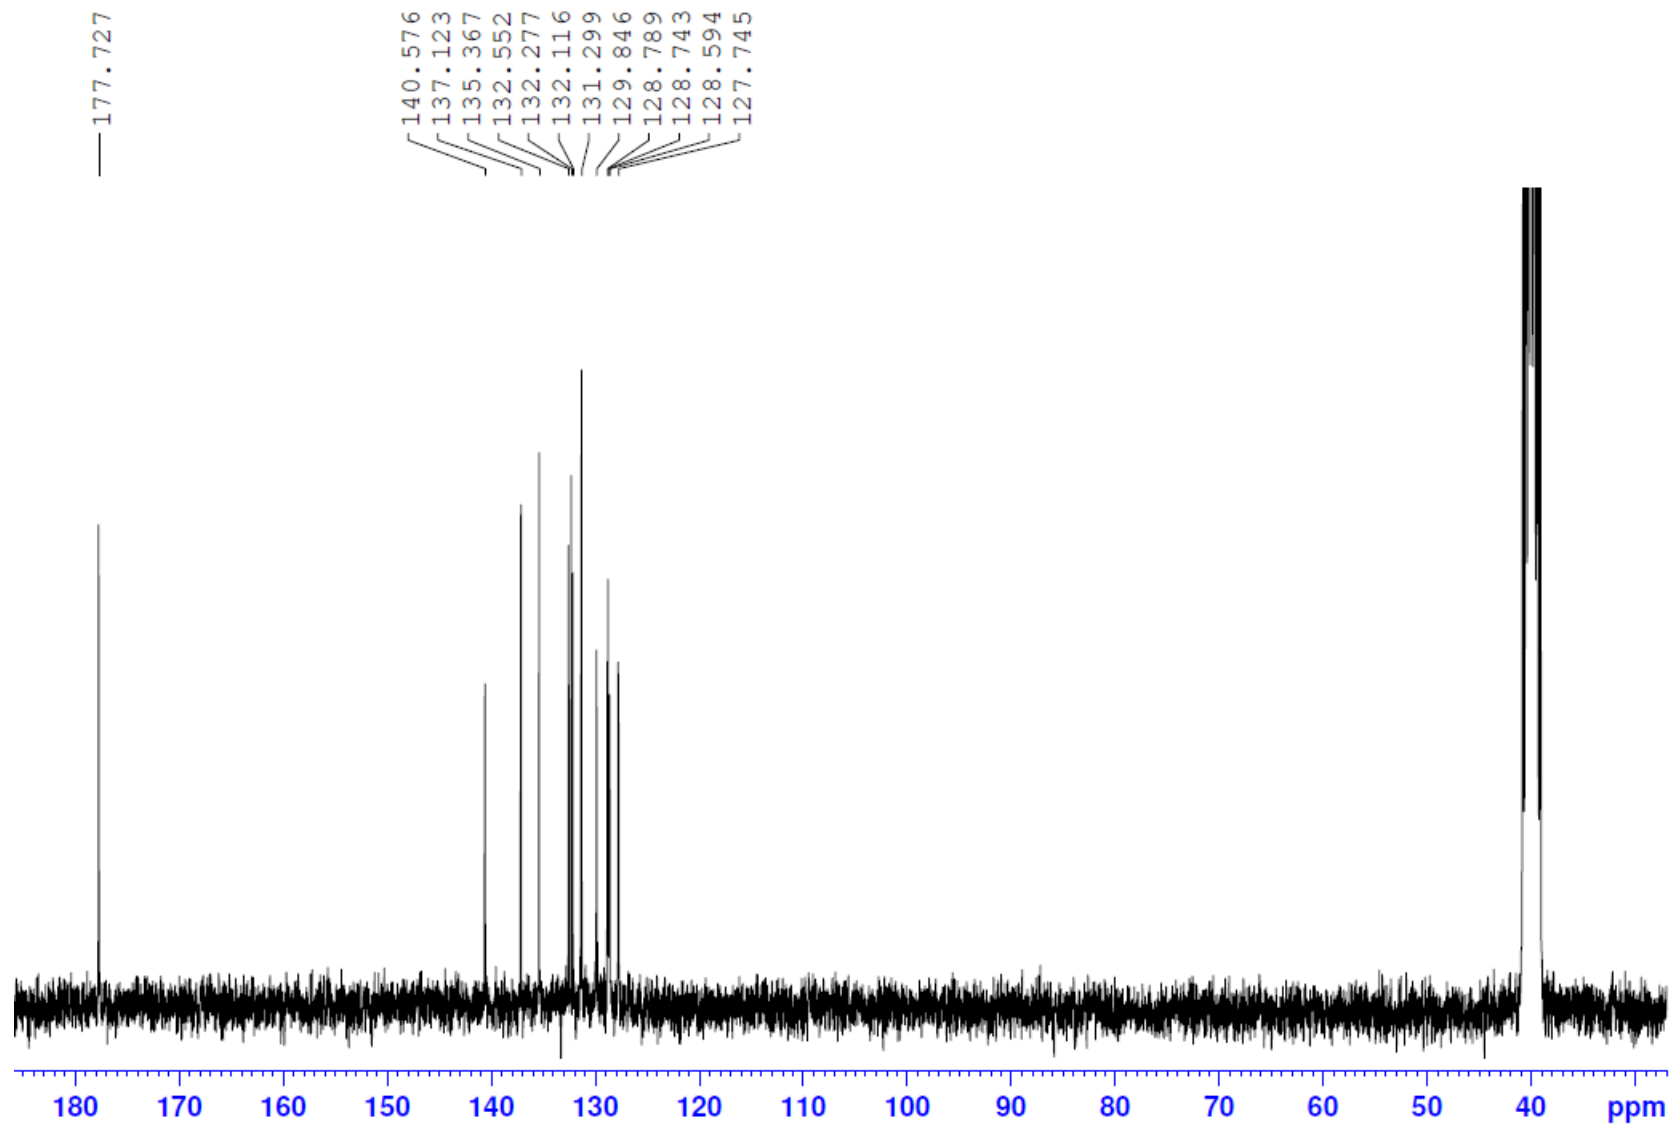

T13

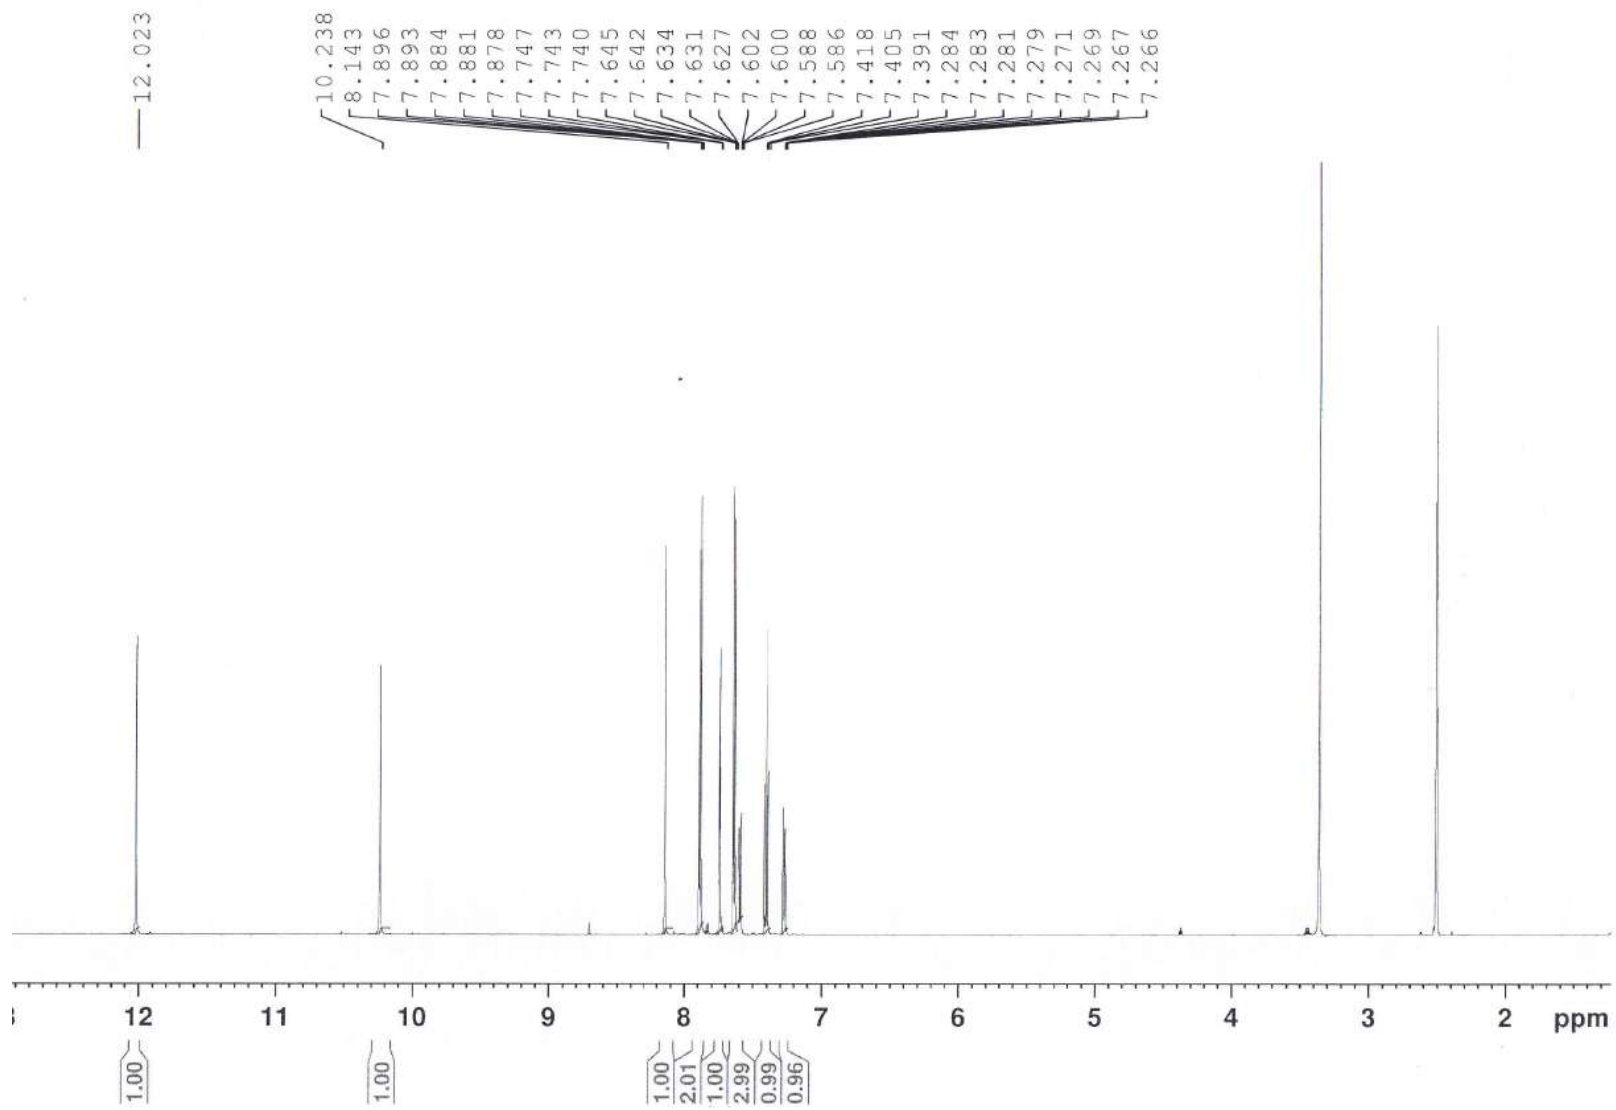

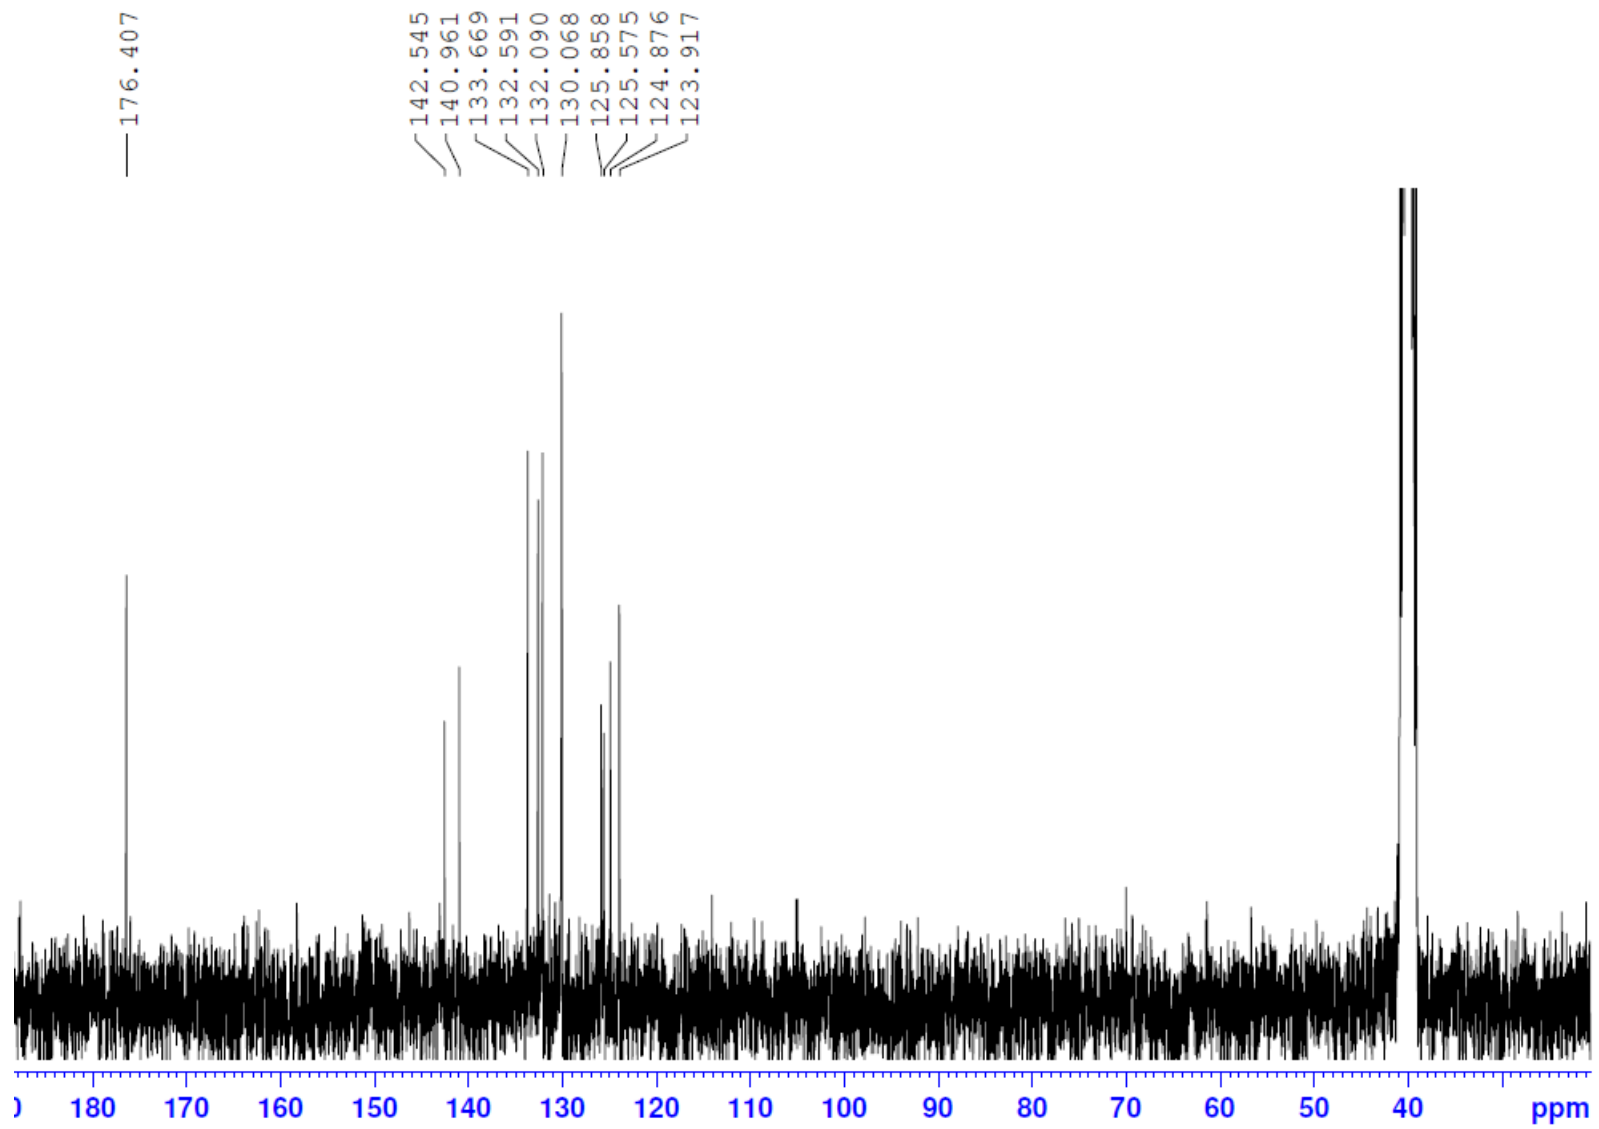

T14

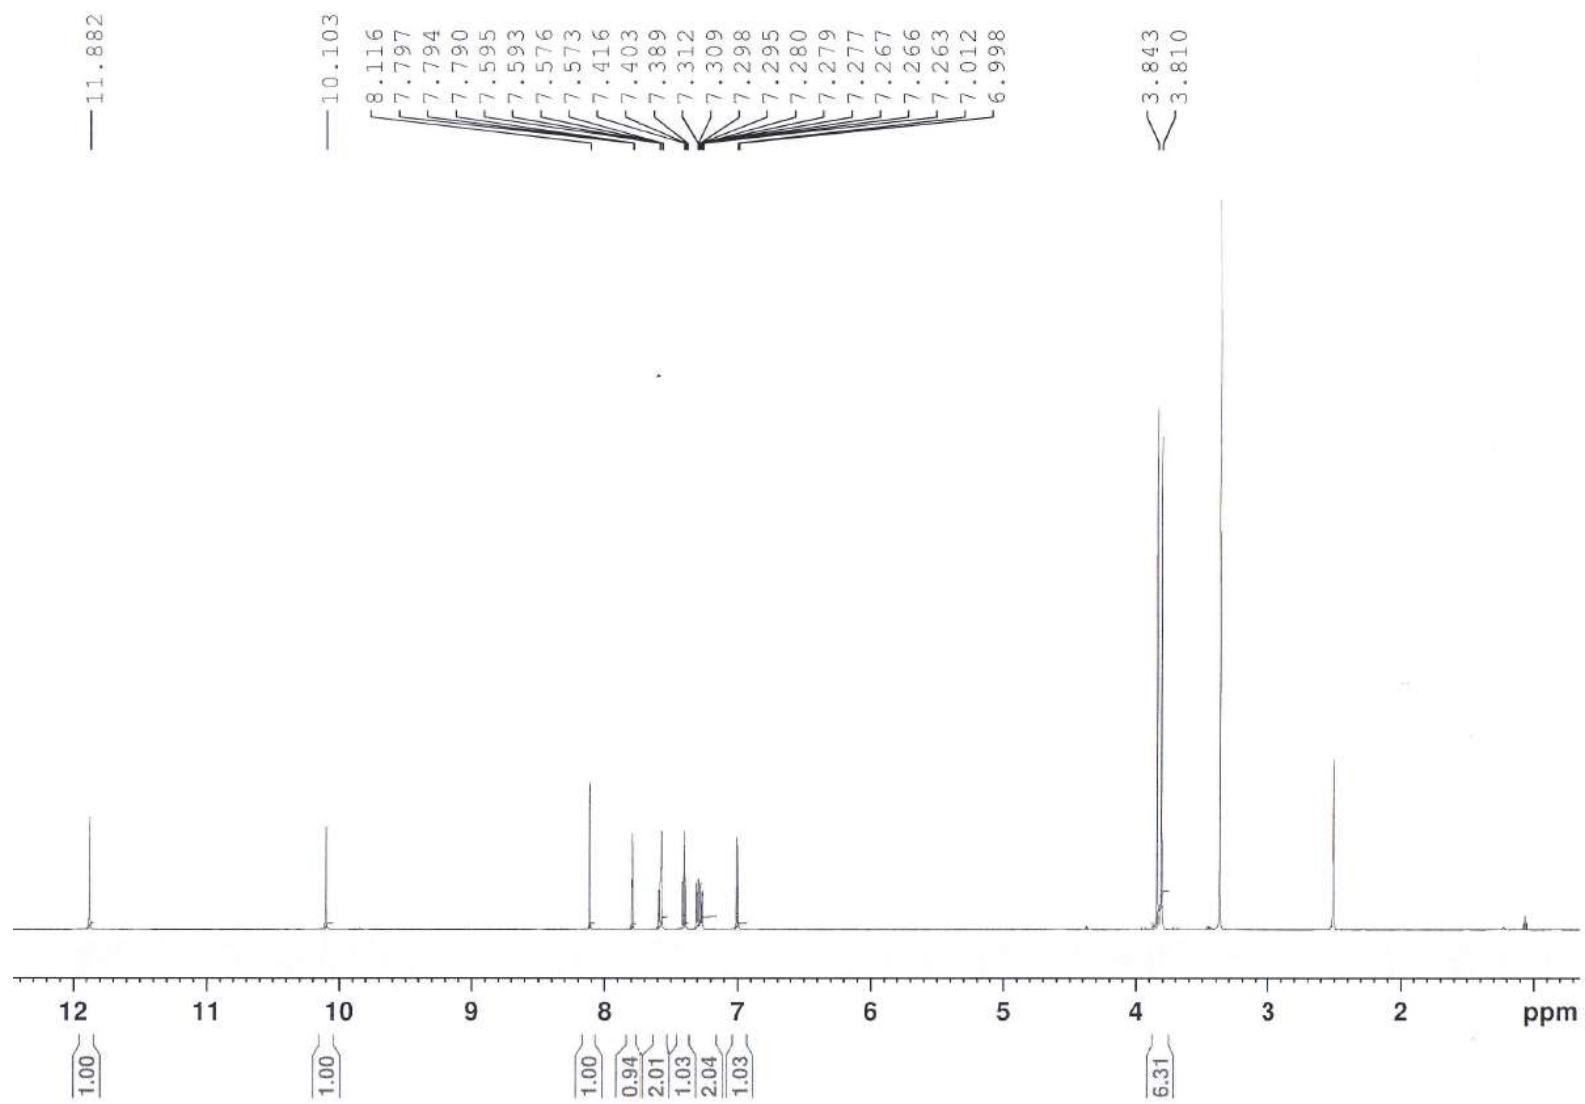

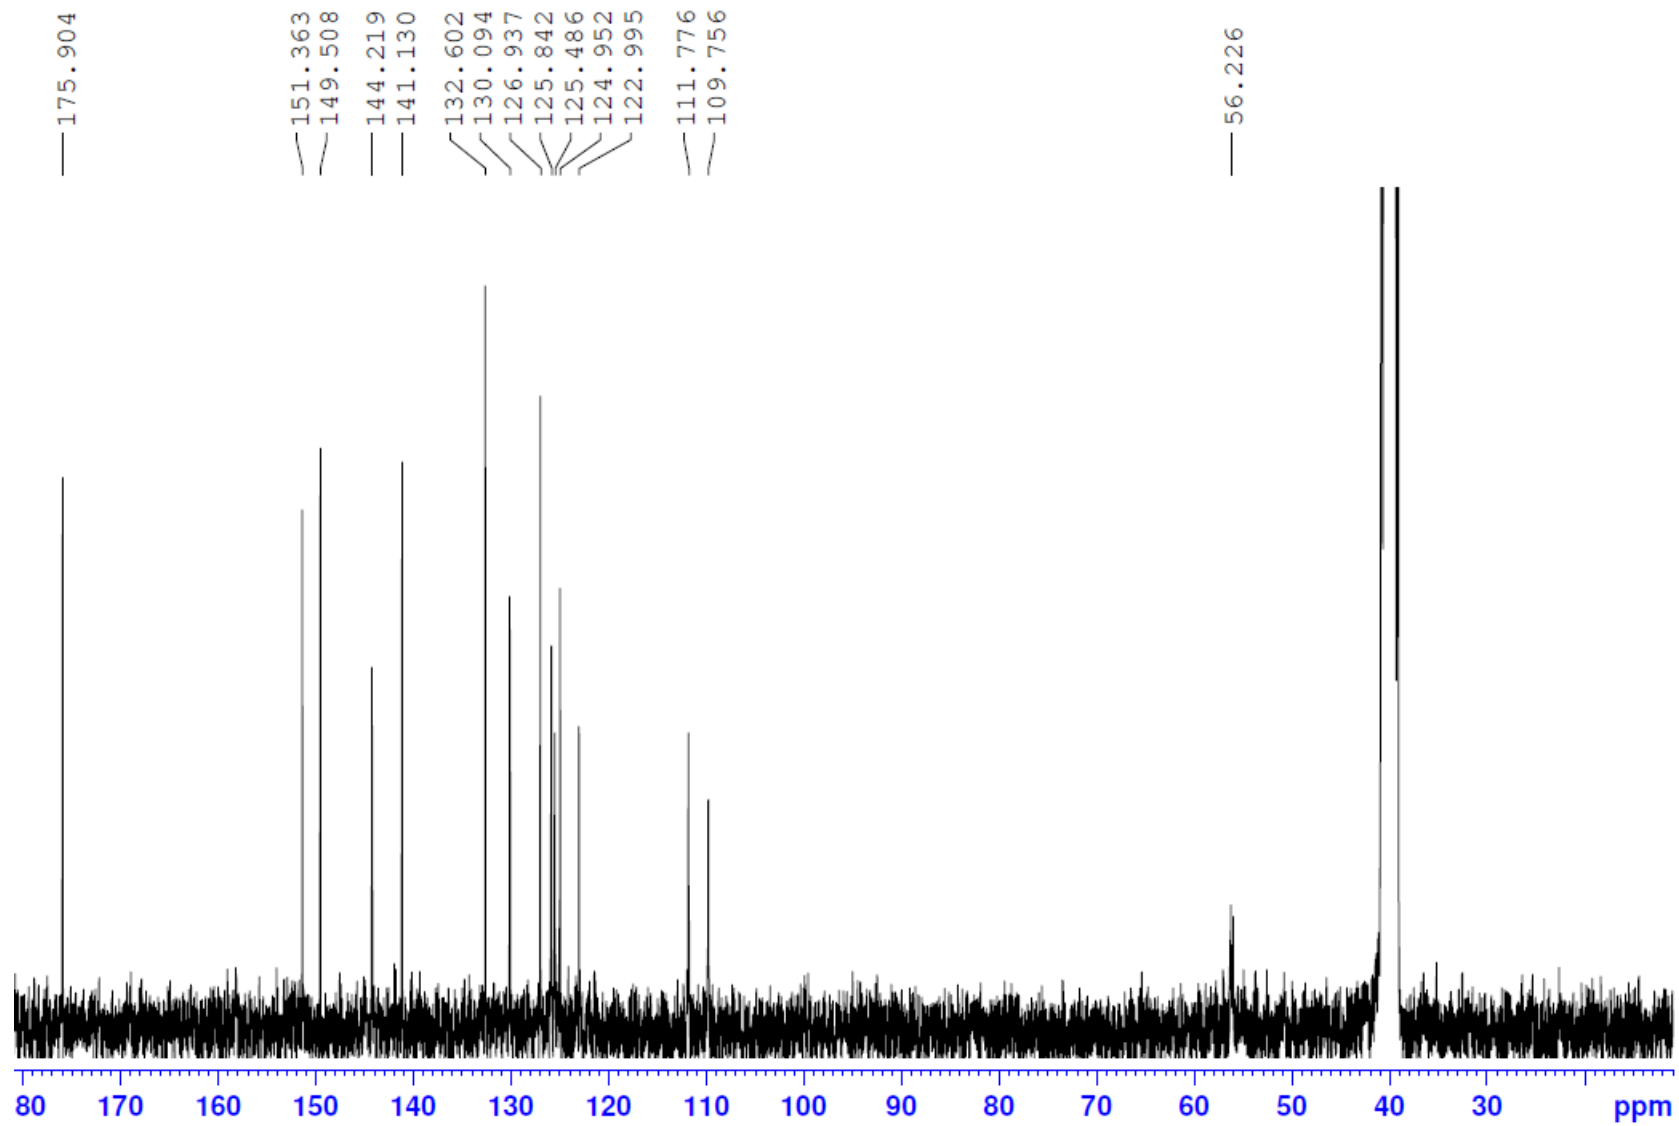

T15

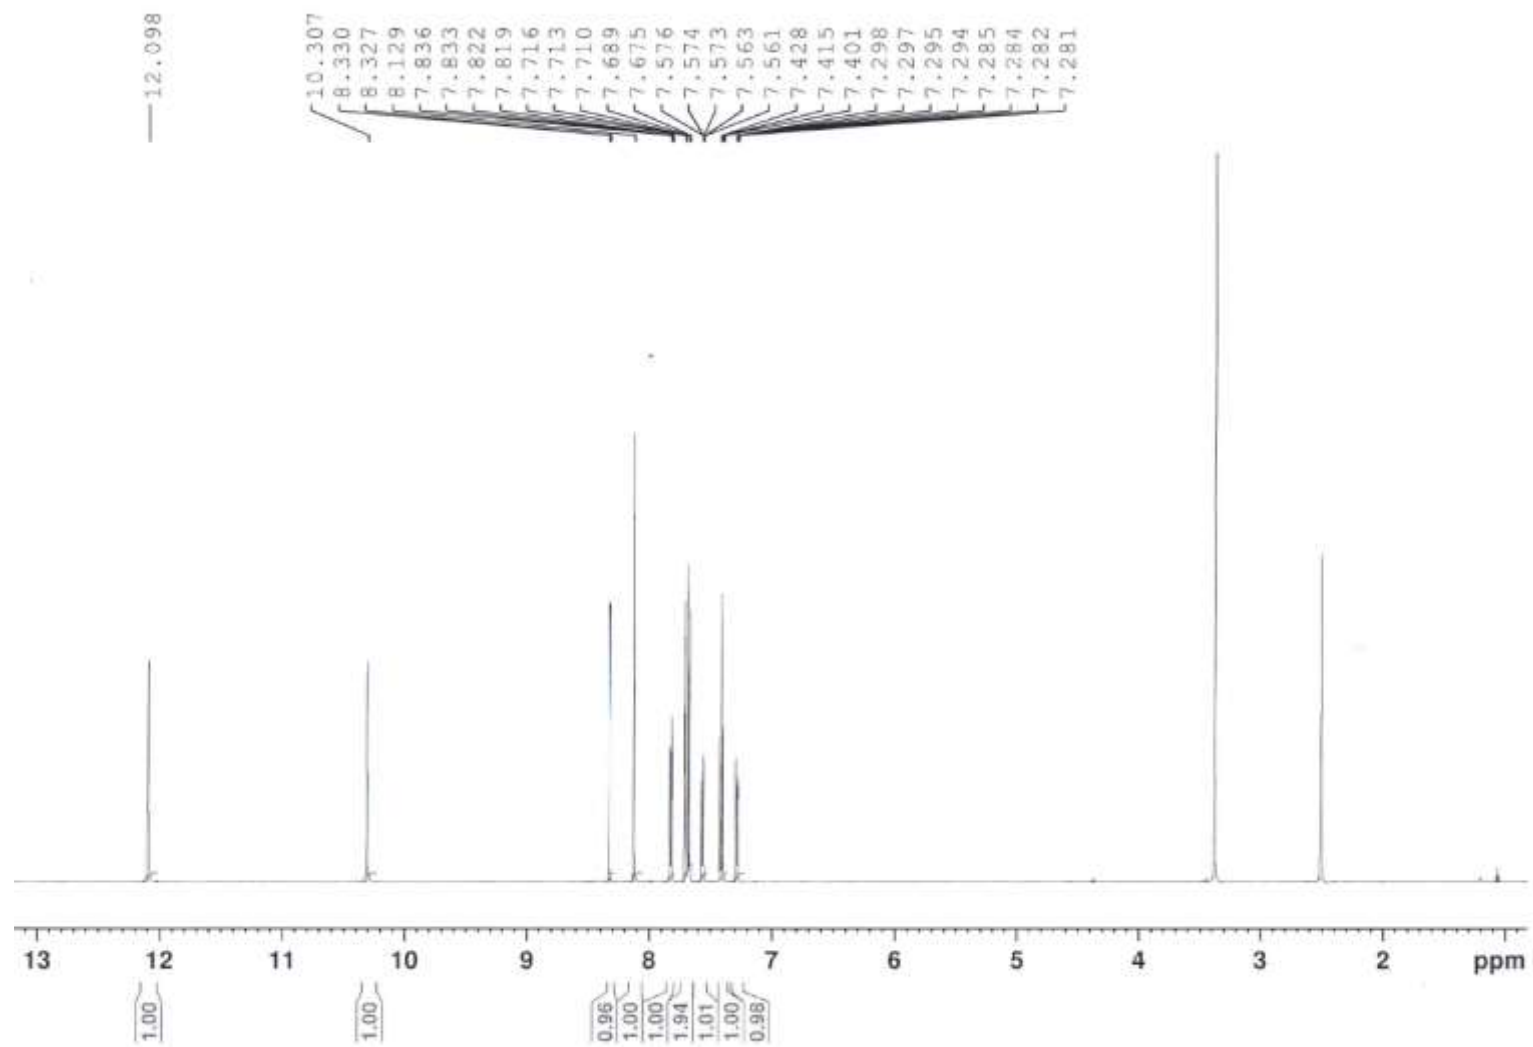



T16

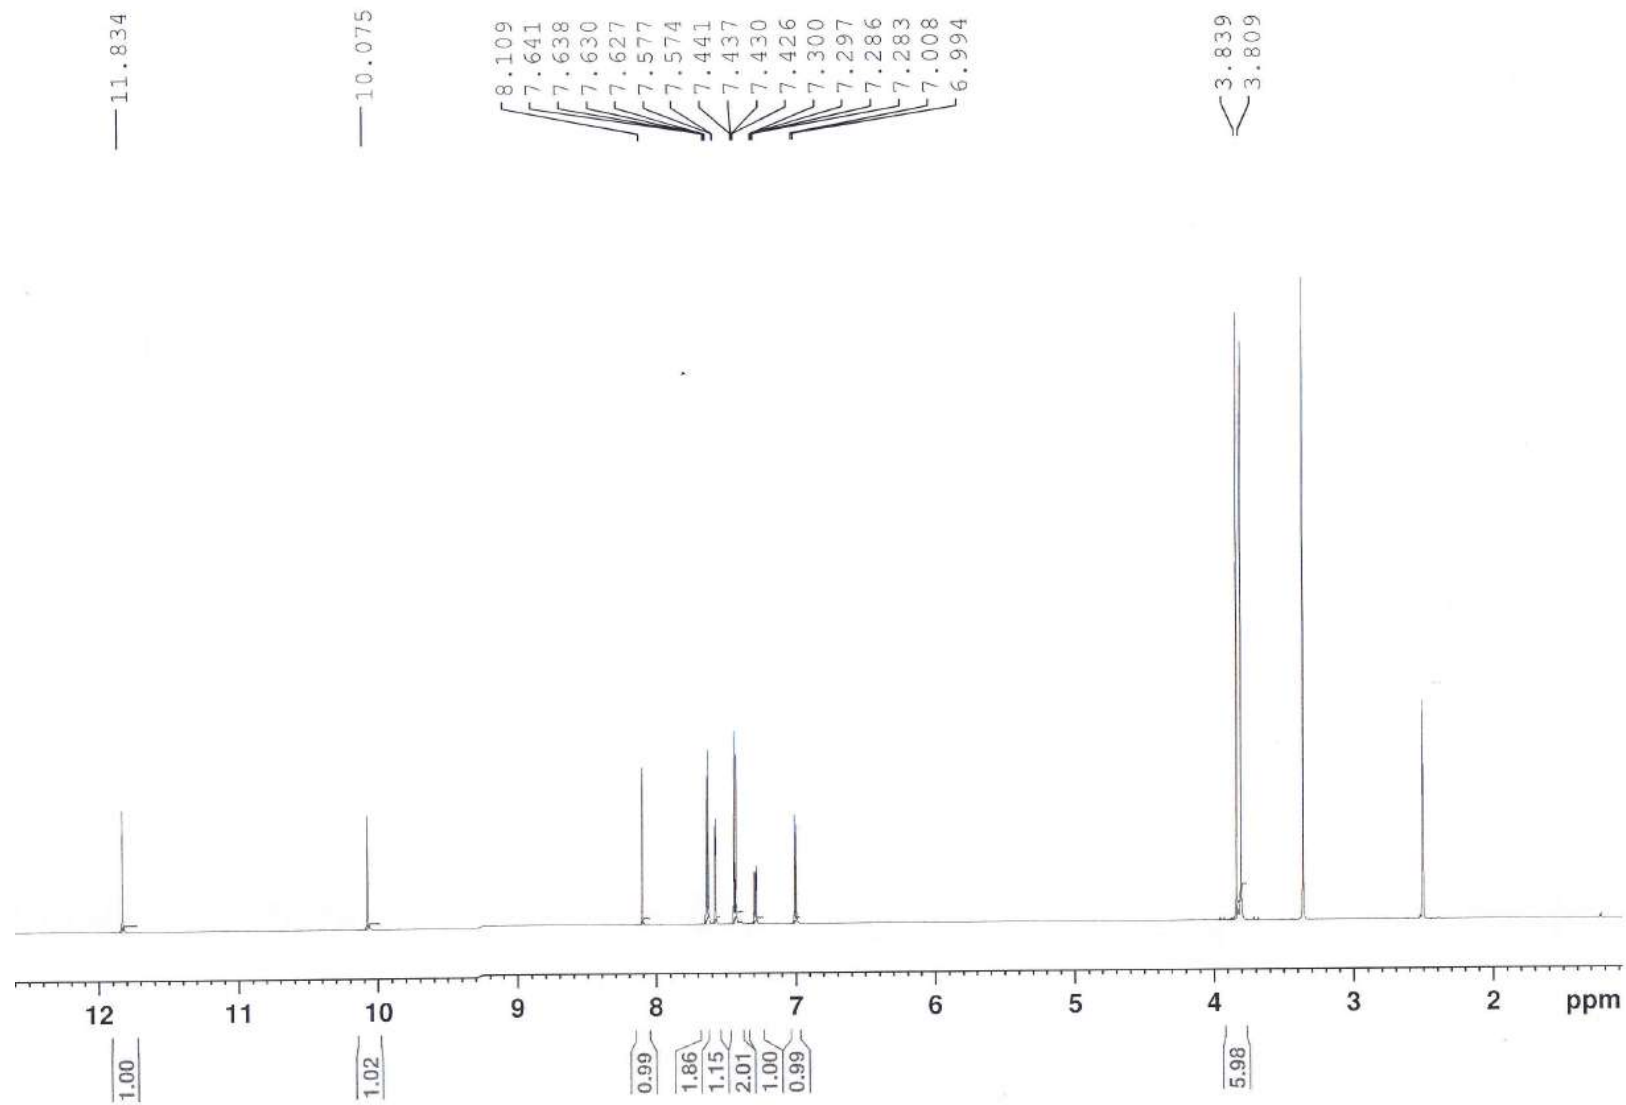

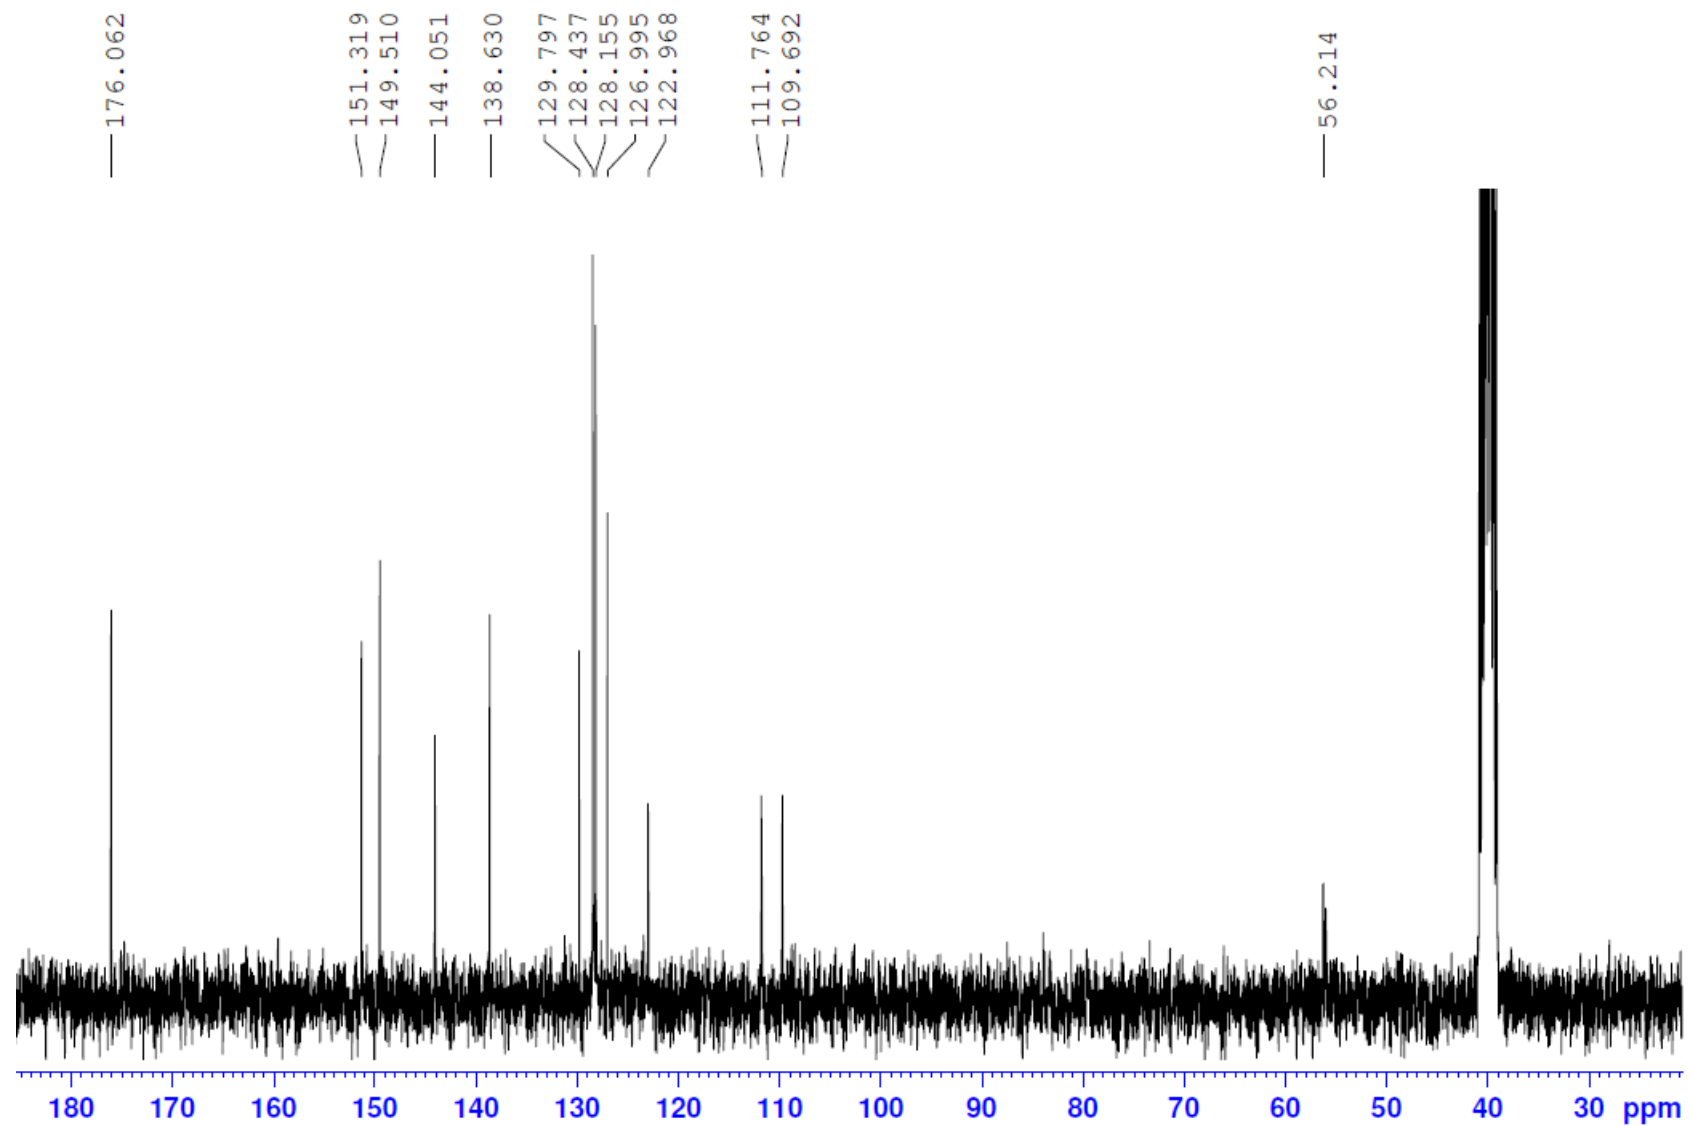

T17

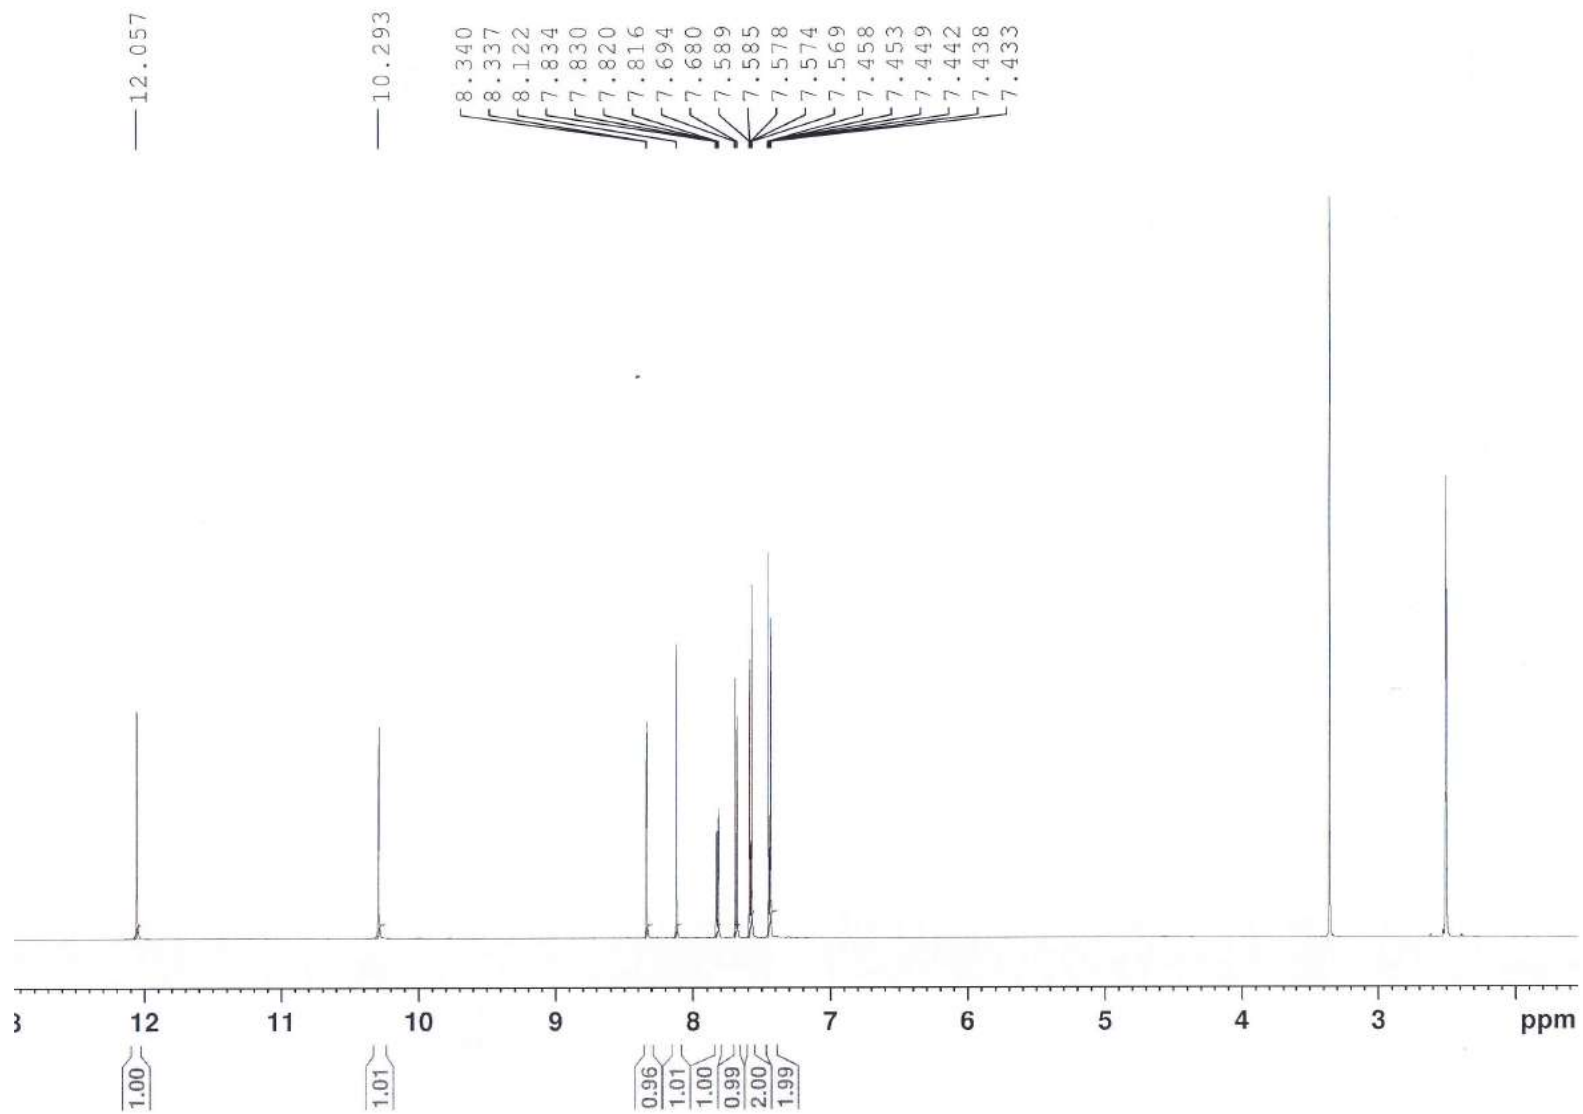

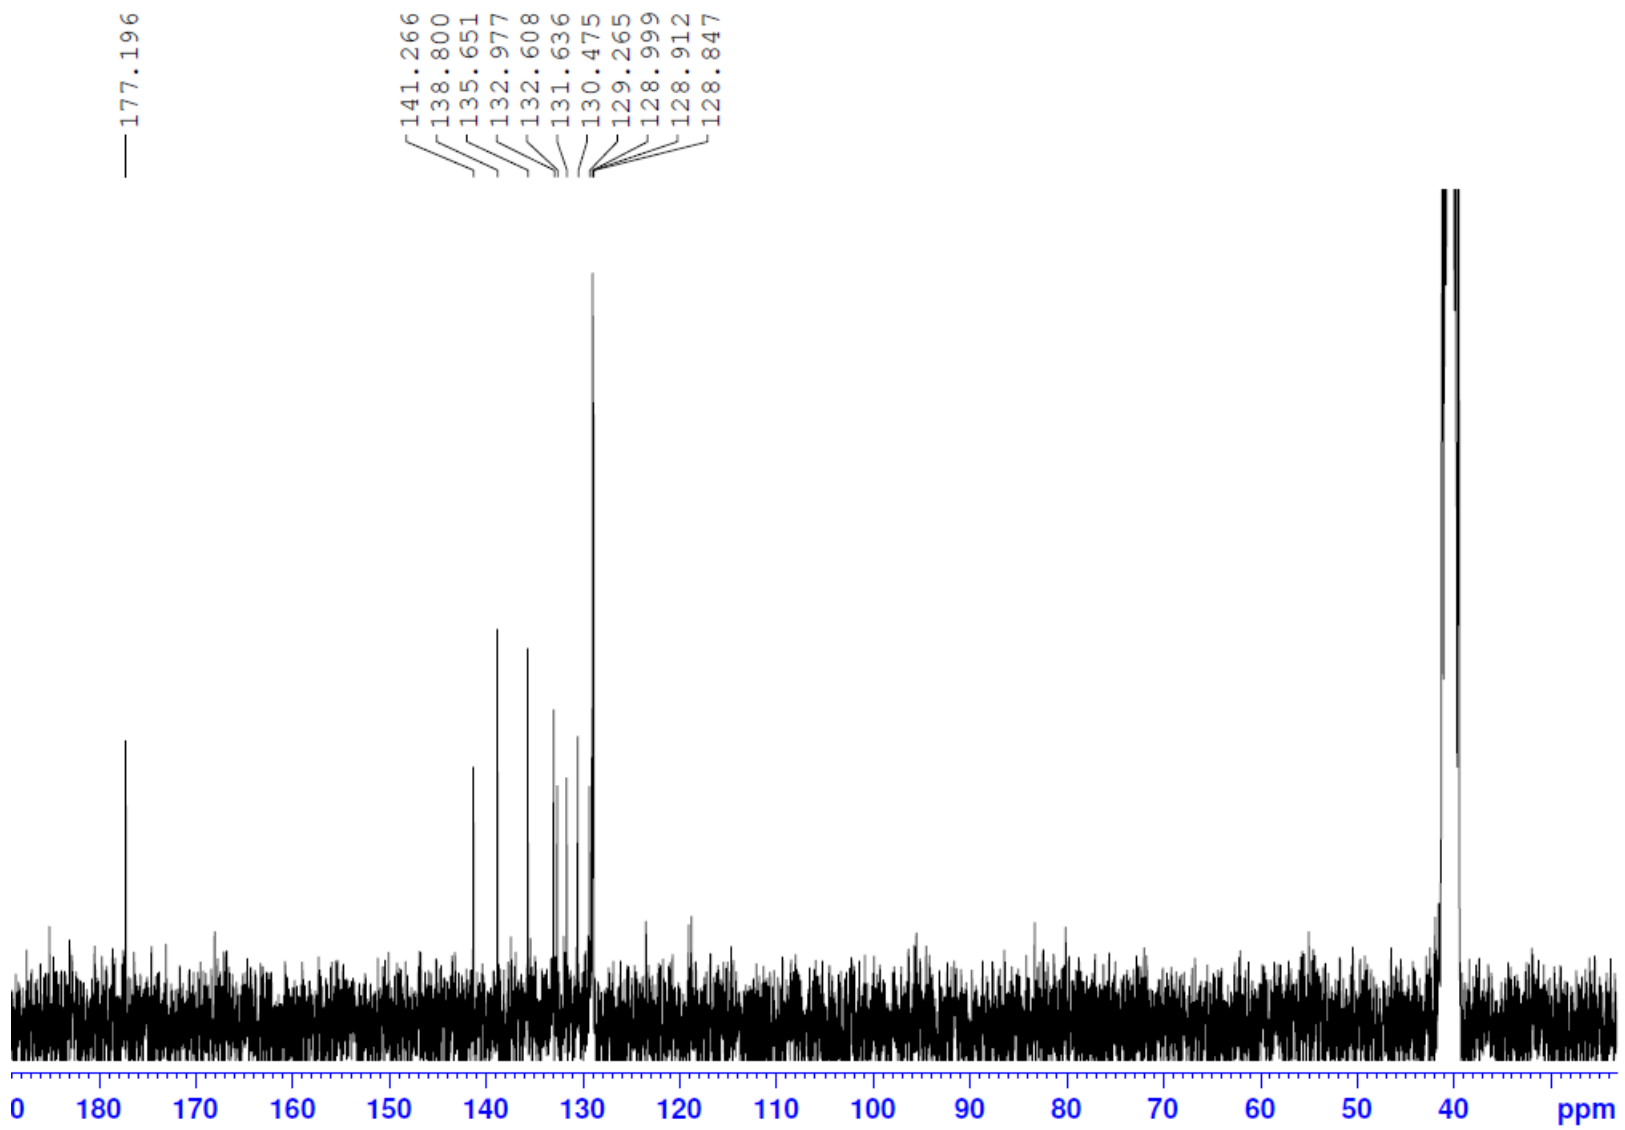

T18

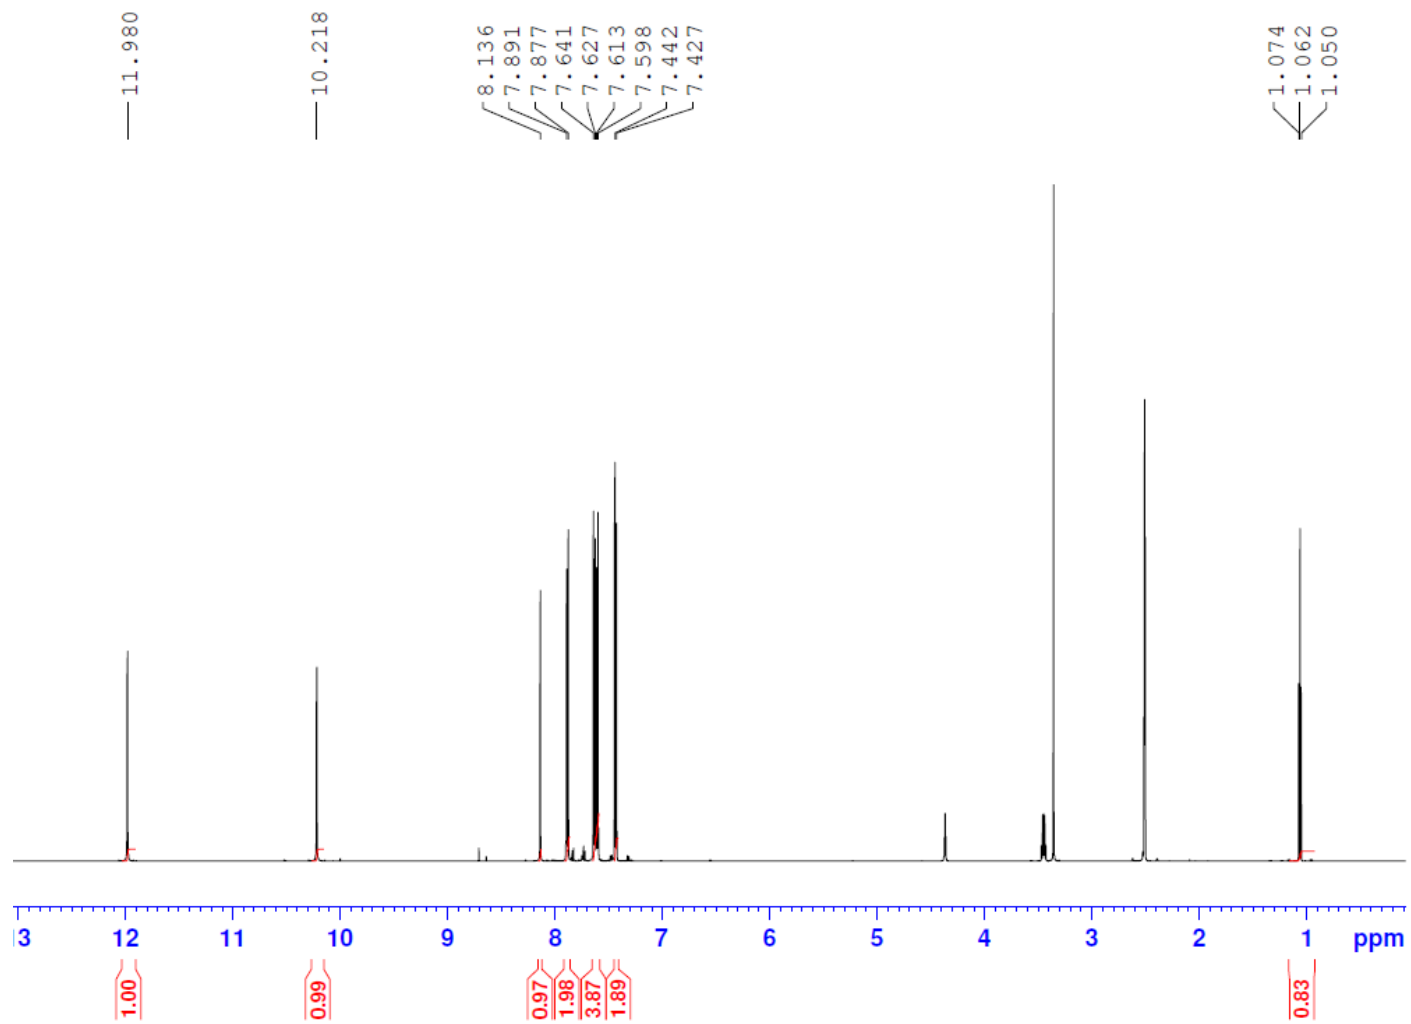

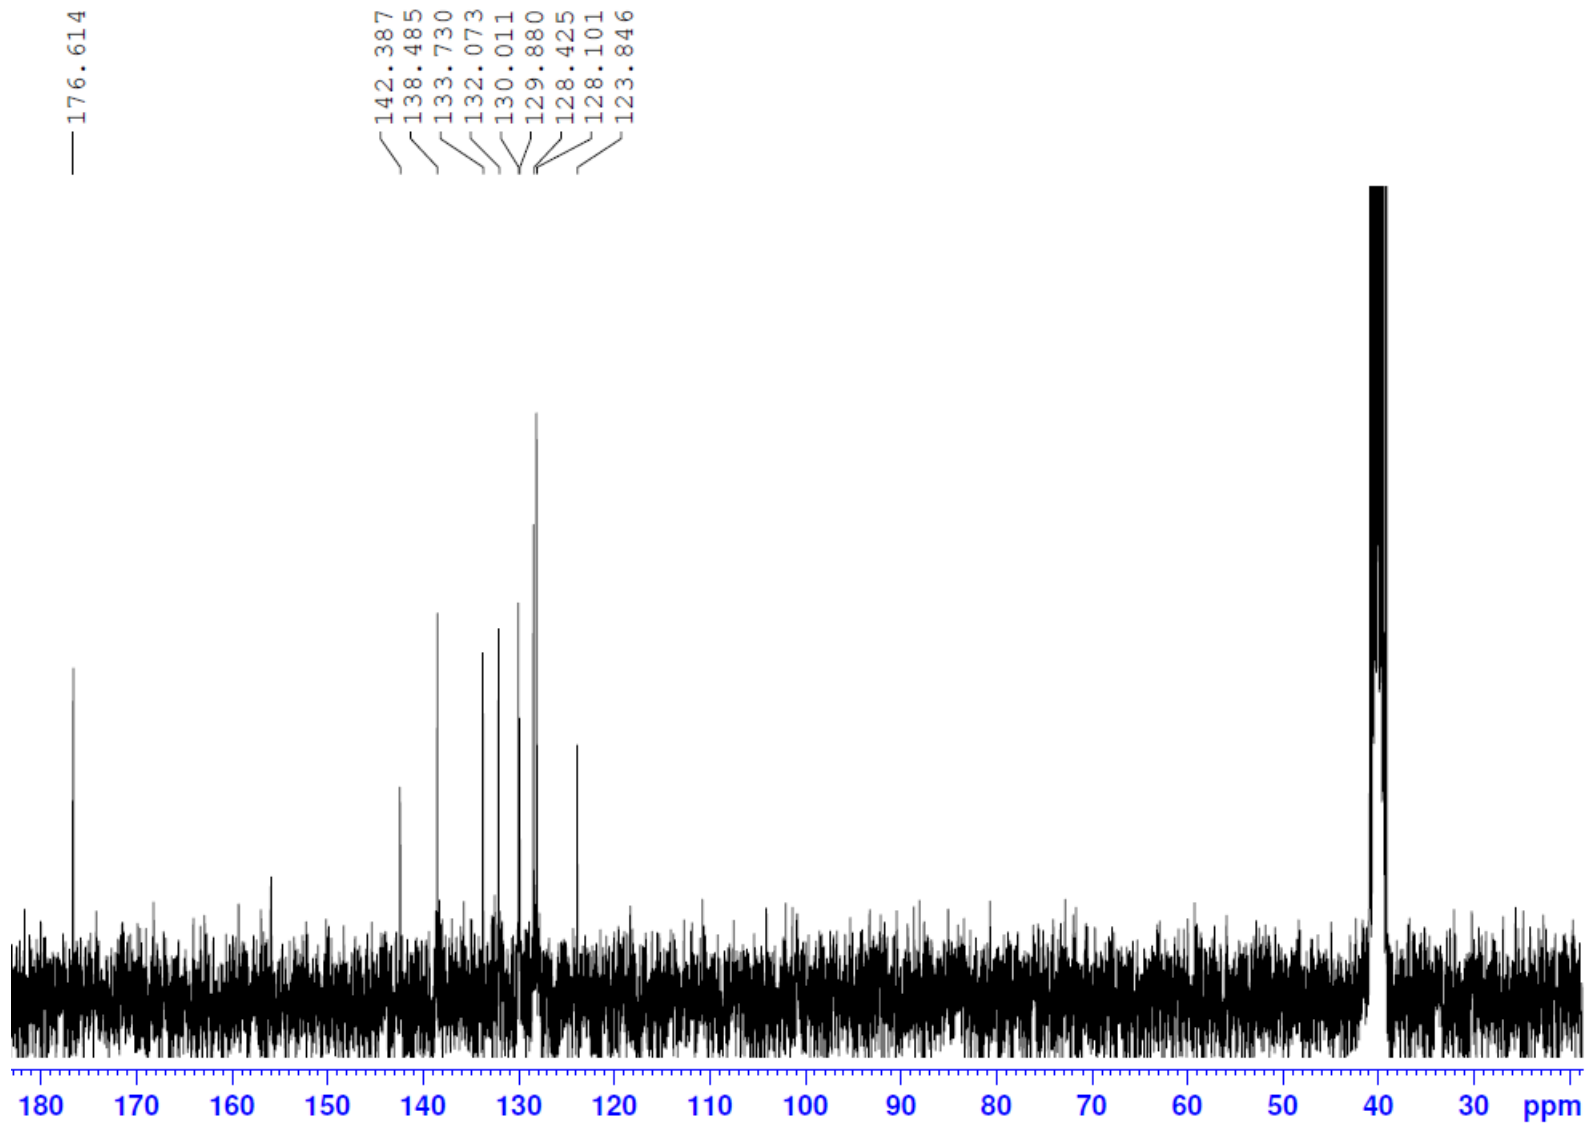

T19

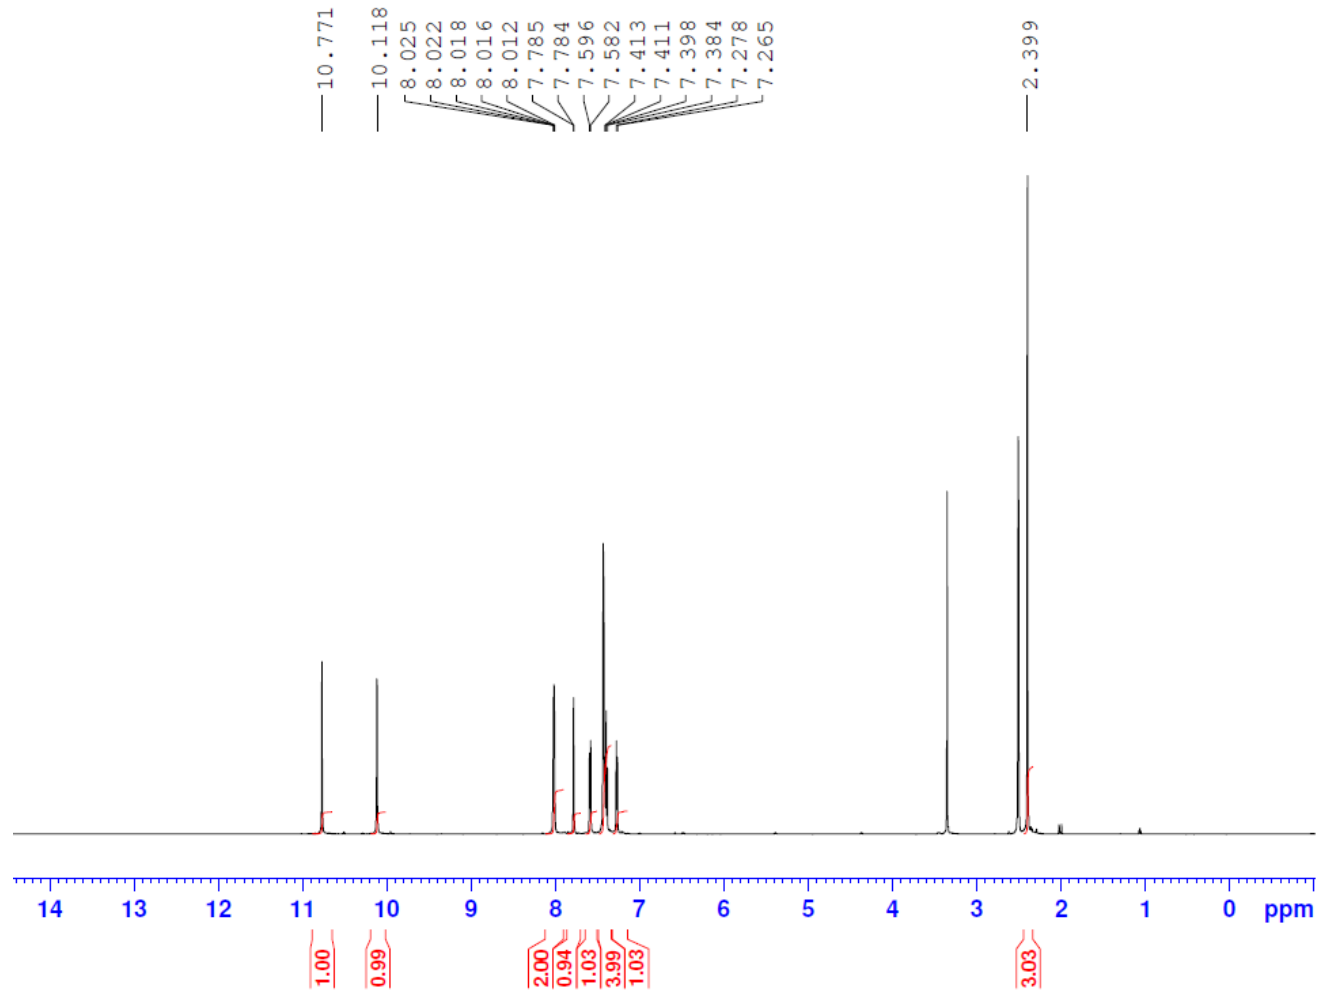

Supplement: ijms-22-03104-s001.pdf [file ijms-22-03104-s001.pdf]
